# Supplementary material
Source: PubMed Central journal article supplement (PMC8552302)
Supplement: NIHMS1747018-supplement-SI.pdf [file NIHMS1747018-supplement-SI.pdf]

## Supporting Information

### Discovery of Nanomolar Melanocortin-3 Receptor (MC3R) Selective Small Molecule Pyrrolidine Bis-Cyclic Guanidine Agonist Compounds Via a High Throughput “Unbiased” Screening Campaign

Skye R. Doering,<sup>1</sup> Katie Freeman,<sup>1</sup> Ginamarie Debevec,<sup>2</sup> Phaedra Geer,<sup>2</sup> Radleigh G. Santos,<sup>3</sup> Travis M. Lavoie,<sup>2</sup> Marc A. Giulianotti,<sup>2</sup> Clemencia Pinilla,<sup>2</sup> Jon R. Appel,<sup>4</sup> Richard A. Houghten,<sup>2</sup> Mark D. Ericson,<sup>1</sup> and Carrie Haskell-Luevano<sup>1\*</sup>

#### Author Affiliations:

<sup>1</sup>Department of Medicinal Chemistry and Institute for Translational Neuroscience, University of Minnesota, Minneapolis, Minnesota 55455, United States

<sup>2</sup>Florida International University, Port St. Lucie, Florida 34987, United States

<sup>3</sup>Nova Southeastern University 3301 College Avenue, Fort Lauderdale, Florida 33314, United States

<sup>4</sup>Torrey Pines Institute for Molecular Studies, San Diego, California 92121, United States

\*Corresponding Author: Phone: 612-626-9262. Fax: 612-626-3114. E-mail: [chaskell@umn.edu](mailto:chaskell@umn.edu).

#### Table of Contents

|      |                                                              |
|------|--------------------------------------------------------------|
| S1.  | Supporting Information Title Page                            |
| S2.  | Pyrrolidine Bis-Cyclic Guanidine Compound Characterization   |
| S14. | Penta-amine Compound Characterization                        |
| S30. | HPLC Characterization of Key Compounds                       |
| S33. | SI Table 1: Building Block to Functionality Table            |
| S36. | SI Table 2: Pyrrolidine Bis-Cyclic Guanidine Compound SMILES |
| S38. | SI Table 3: Penta-amine Compound SMILES                      |

### **Pyrrolidine Bis-Cyclic Guanidine Compound Characterization:**

**1: (R)-1-((S)-3-(adamantan-1-ylmethyl)-1-((R)-1-cyclohexyl-3-((S)-2-(((R)-2-imino-5-isobutylimidazolidin-1-yl)methyl)pyrrolidin-1-yl)propan-2-yl)-2-iminoimidazolidin-4-yl)ethanol.** Using General Scheme (scheme 1) for the synthesis of bis-cyclic guanidines compound 2509-4 was synthesized using the following reagents: Boc-D-Leucine-OH·H<sub>2</sub>O (R1), Boc-D-Cyclohexylalanine-OH (R2), Boc-D-Threonine(Bzl)-OH (R3), 1-Adamantanecarboxylic acid (R4). The final crude product was purified using HPLC as described above, with a gradient of (B) 2, 0/2, 2/2, 6/20, 30/50. **<sup>1</sup>H NMR** (400 MHz, CHLOROFORM-*d*) δ ppm 10.11 (br. s., 1 H) 8.83 (br. s., 1 H) 8.60 (br. s., 2 H) 4.33 (br. s., 2 H) 4.08 (br. s., 2 H) 3.98 (br. s., 1 H) 3.79 (br. s., 1 H) 3.56 - 3.73 (m, 2 H) 3.49 (br. s., 3 H) 3.29 (br. s., 2 H) 3.14 (br. s., 1 H) 2.91 (d, *J*=14.79 Hz, 1 H) 2.82 (br. s., 1 H) 2.65 (br. s., 1 H) 2.21 - 2.40 (m, 2 H) 1.99 (br. s., 4 H) 1.84 (br. s., 1 H) 1.71 (br. s., 6 H) 1.53 - 1.68 (m, 11 H) 1.41 - 1.53 (m, 3 H) 1.35 (br. s., 1 H) 1.19 (br. s., 6 H) 0.98 (br. s., 4 H) 0.93 (br. s., 4 H); ***m/z*** calcd C<sub>37</sub>H<sub>65</sub>N<sub>7</sub>O [M+H]<sup>+</sup> 624.54, found (MS ESI) 624.5. **Purity** LCMS: 96.45% (TIC), 98% (214 nm, peak area); **RT** = 4.30 min

**2: (R)-1-((S)-3-((4-(tert-butyl)cyclohexyl)methyl)-1-((R)-1-cyclohexyl-3-((S)-2-(((R)-2-imino-5-isobutylimidazolidin-1-yl)methyl)pyrrolidin-1-yl)propan-2-yl)-2-iminoimidazolidin-4-yl)ethanol.** Using General Scheme (scheme 1) for the synthesis of bis-cyclic guanidines compound 2509-5 was synthesized using the following reagents: Boc-D-Leucine-OH·H<sub>2</sub>O (R1), Boc-D-Cyclohexylalanine-OH (R2), Boc-D-Threonine(Bzl)-OH (R3), 4-tert-butyl-cyclohexanecarboxylic acid (R4). The final crude product was purified using HPLC as described above, with a gradient of (B) 2, 0/2, 2/2, 6/20, 30/50. **<sup>1</sup>H NMR** (400 MHz, CHLOROFORM-*d*) δ ppm 10.21 (br. s., 1 H) 8.60 (br. s., 2 H) 4.35 (br. s., 1 H) 3.84 - 4.06 (m, 3 H) 3.78 (br. s., 2 H) 3.67 (br. s., 2 H) 3.40 - 3.59 (m, 3 H) 3.27 (d, *J*=14.18 Hz, 2 H) 3.01 - 3.21 (m, 2 H) 2.83 (br. s., 1 H) 2.63 (br. s., 1 H) 2.24 - 2.38 (m, 2 H) 2.19 (br. s., 1 H) 1.95 (d, *J*=11.86 Hz, 1 H) 1.83 (br. s., 1 H) 1.70 (br. s., 3 H) 1.52 - 1.67 (m, 8 H) 1.40 - 1.52 (m, 4 H) 1.34 (br. s., 1 H) 1.24 (br. s., 3 H) 1.16 (br. s., 5 H) 0.99 (br. s., 5 H) 0.93 (br. s., 4 H) 0.85 (br. s., 8 H); ***m/z*** calcd C<sub>37</sub>H<sub>69</sub>N<sub>7</sub>O [M+H]<sup>+</sup> 628.56, found (MS ESI) 628.55. **Purity** LCMS: 98.41% (TIC), 99% (214 nm, peak area); **RT** = 4.52 min

**3: (R)-1-((S)-1-((R)-1-cyclohexyl-3-((S)-2-(((R)-2-imino-5-isobutylimidazolidin-1-yl)methyl)pyrrolidin-1-yl)propan-2-yl)-2-imino-3-(4-methylpentyl)imidazolidin-4-yl)ethanol.** Using General Scheme (scheme 1) for the synthesis of bis-cyclic guanidines compound 2509-6 was synthesized using the following reagents: Boc-D-Leucine-OH·H<sub>2</sub>O (R1), Boc-D-Cyclohexylalanine-OH (R2), Boc-D-Threonine(Bzl)-OH (R3), 4-Methylvaleric acid (R4). The final crude product was purified using HPLC as described above, with a gradient of (B) 2, 0/2, 2/2, 6/20, 30/50. **<sup>1</sup>H NMR** (400 MHz, CHLOROFORM-*d*) δ ppm 10.06 (br. s., 1 H) 8.59 (br. s., 2 H) 4.24 (br. s., 2 H) 3.96 (br. s., 2 H) 3.84 (br. s., 1 H) 3.78 (br. s., 1 H) 3.71 (d, *J*=9.78 Hz, 2 H) 3.44 - 3.58 (m, 1 H) 3.42 (br. s., 1 H) 3.28 - 3.38 (m, 2 H) 3.23 (d, *J*=15.53 Hz, 2 H) 2.81 (br. s., 1 H) 2.72 (br. s., 1 H) 2.35 (d, *J*=13.20 Hz, 2 H) 1.81 - 1.93 (m, 2 H) 1.73 (br. s., 3 H) 1.63 (br. s., 3 H) 1.50 - 1.60 (m, 4 H) 1.45 (br. s., 2 H) 1.36 (br. s., 1 H) 1.17 (s, 3 H) 1.21 (s, 5 H) 0.98 (br. s., 4 H) 0.79 - 0.95 (m, 9 H); ***m/z*** calcd C<sub>32</sub>H<sub>61</sub>N<sub>7</sub>O [M+H]<sup>+</sup> 560.49, found (MS ESI) 560.45. **Purity** LCMS: 96.78% (TIC), 99% (214 nm, peak area); **RT** = 4.08 min

**4: (R)-3-(adamantan-1-ylmethyl)-1-((R)-1-cyclohexyl-3-((S)-2-(((R)-2-imino-5-isobutylimidazolidin-1-yl)methyl)pyrrolidin-1-yl)propan-2-yl)-4-propylimidazolidin-2-imine.** Using General Scheme (scheme 1) for the synthesis of bis-cyclic guanidines compound 2509-7 was synthesized using the following reagents: Boc-D-Leucine-OH·H<sub>2</sub>O (R1), Boc-D-

Cyclohexylalanine-OH (R2), Boc-D-Norvaline-OH (R3), 1-Adamantanecarboxylic acid (R4). The final crude product was purified using HPLC as described above, with a gradient of (B) 2, 0/2, 2/2, 6/20, 30/50. **1H NMR** (400 MHz, CHLOROFORM-*d*)  $\delta$  ppm 10.75 (br. s., 1 H) 9.24 (br. s., 1 H) 8.64 (br. s., 2 H) 4.20 (br. s., 1 H) 3.95 (br. s., 1 H) 3.74 (br. s., 2 H) 3.46 - 3.65 (m, 2 H) 3.24 - 3.43 (m, 3 H) 3.07 - 3.24 (m, 2 H) 2.93 (br. s., 1 H) 2.82 (br. s., 1 H) 2.73 (d,  $J=15.77$  Hz, 1 H) 2.51 - 2.61 (m, 1 H) 2.46 (d,  $J=13.33$  Hz, 1 H) 1.99 (br. s., 3 H) 1.86 - 1.97 (m, 2 H) 1.80 (br. s., 3 H) 1.71 (br. s., 5 H) 1.62 (s, 3 H) 1.65 (s, 4 H) 1.56 (br. s., 5 H) 1.44 (br. s., 4 H) 1.31 (br. s., 2 H) 1.07 - 1.23 (m, 4 H) 0.87 - 1.06 (m, 10 H); **m/z** calcd C<sub>38</sub>H<sub>67</sub>N<sub>7</sub> [M+H]<sup>+</sup> 622.55, found (MS ESI) 622.5. **Purity** LCMS: 95.96% (TIC), 99% (214 nm, peak area); **RT** = 4.73min

**5: (R)-3-((4-(tert-butyl)cyclohexyl)methyl)-1-((R)-1-cyclohexyl-3-((S)-2-(((R)-2-imino-5-isobutylimidazolidin-1-yl)methyl)pyrrolidin-1-yl)propan-2-yl)-4-propylimidazolidin-2-imine.** Using General Scheme (scheme 1) for the synthesis of bis-cyclic guanidines compound 2509-8 was synthesized using the following reagents: Boc-D-Leucine-OH·H<sub>2</sub>O (R1), Boc-D-Cyclohexylalanine-OH (R2), Boc-D-Norvaline-OH (R3), 4-tert-butyl-cyclohexanecarboxylic acid (R4). The final crude product was purified using HPLC as described above, with a gradient of (B) 2, 0/2, 2/2, 6/20, 30/50. **1H NMR** (400 MHz, CHLOROFORM-*d*)  $\delta$  ppm 8.62 (br. s., 2 H) 4.19 (br. s., 1 H) 3.90 (br. s., 1 H) 3.84 (br. s., 1 H) 3.74 (br. s., 2 H) 3.59 (br. s., 1 H) 3.39 (d,  $J=14.79$  Hz, 1 H) 3.29 (br. s., 2 H) 3.19 (br. s., 2 H) 3.05 (d,  $J=14.67$  Hz, 1 H) 2.92 (br. s., 1 H) 2.83 (br. s., 1 H) 2.54 (br. s., 1 H) 2.47 (d,  $J=13.33$  Hz, 1 H) 2.09 (br. s., 1 H) 1.83 - 1.96 (m, 2 H) 1.81 (br. s., 2 H) 1.73 (br. s., 3 H) 1.49 - 1.66 (m, 9 H) 1.43 (br. s., 4 H) 1.35 (br. s., 2 H) 1.16 (br. s., 6 H) 0.89 - 1.04 (m, 11 H) 0.86 (br. s., 9 H); **m/z** calcd C<sub>38</sub>H<sub>71</sub>N<sub>7</sub> [M+H]<sup>+</sup> 626.58, found (MS ESI) 626.55. **Purity** LCMS: 97.36% (TIC), 99% (214 nm, peak area); **RT** = 4.92 min

**6: (R)-1-((R)-1-cyclohexyl-3-((S)-2-(((R)-2-imino-5-isobutylimidazolidin-1-yl)methyl)pyrrolidin-1-yl)propan-2-yl)-3-(4-methylpentyl)-4-propylimidazolidin-2-imine.** Using General Scheme (scheme 1) for the synthesis of bis-cyclic guanidines compound 2509-9 was synthesized using the following reagents: Boc-D-Leucine-OH·H<sub>2</sub>O (R1), Boc-D-Cyclohexylalanine-OH (R2), Boc-D-Norvaline-OH (R3), 4-Methylvaleric acid (R4). The final crude product was purified using HPLC as described above, with a gradient of (B) 2, 0/2, 2/2, 6/20, 30/50. **1H NMR** (400 MHz, CHLOROFORM-*d*)  $\delta$  ppm 8.59 (br. s., 2 H) 4.11 (br. s., 1 H) 3.79 (br. s., 1 H) 3.63 - 3.75 (m, 3 H) 3.55 (br. s., 1 H) 3.38 (d,  $J=14.79$  Hz, 1 H) 3.25 (br. s., 2 H) 3.02 - 3.19 (m, 3 H) 2.88 (br. s., 1 H) 2.80 (br. s., 1 H) 2.37 - 2.52 (m, 2 H) 1.72 - 1.88 (m, 4 H) 1.64 (d,  $J=18.46$  Hz, 4 H) 1.52 (br. s., 5 H) 1.24 - 1.46 (m, 6 H) 1.14 (br. s., 6 H) 0.81 - 1.01 (m, 17 H); **m/z** calcd C<sub>33</sub>H<sub>63</sub>N<sub>7</sub> [M+H]<sup>+</sup> 558.51, found (MS ESI) 558.45. **Purity** LCMS: 97.89% (TIC), 99% (214 nm, peak area); **RT** = 4.48 min

**7: (R)-3-(adamantan-1-ylmethyl)-1-((R)-1-cyclohexyl-3-((S)-2-(((R)-2-imino-5-isobutylimidazolidin-1-yl)methyl)pyrrolidin-1-yl)propan-2-yl)-4-isopropylimidazolidin-2-imine.** Using General Scheme (scheme 1) for the synthesis of bis-cyclic guanidines compound 2509-10 was synthesized using the following reagents: Boc-D-Leucine-OH·H<sub>2</sub>O (R1), Boc-D-Cyclohexylalanine-OH (R2), Boc-D-Valine-OH (R3), 1-Adamantanecarboxylic acid (R4). The final crude product was purified using HPLC as described above, with a gradient of (B) 2, 0/2, 2/2, 6/20, 25/45. **1H NMR** (400 MHz, CHLOROFORM-*d*)  $\delta$  ppm 10.51 (br. s., 1 H) 9.25 (br. s., 1 H) 8.63 (br. s., 2 H) 4.13 (br. s., 1 H) 4.00 (br. s., 1 H) 3.73 (br. s., 2 H) 3.60 (d,  $J=15.28$  Hz, 1 H) 3.35 - 3.52 (m, 2 H) 3.26 (br. s., 3 H) 3.15 (d,  $J=14.79$  Hz, 1 H) 2.94 (br. s., 1 H) 2.79 - 2.89 (m, 1 H) 2.71 (d,  $J=15.41$  Hz, 1 H) 2.47 (d,  $J=10.76$  Hz, 2 H) 2.25 (br. s., 1 H) 1.99 (br. s., 3 H) 1.85 - 1.95 (m, 2 H) 1.80 (br. s., 2 H) 1.60 - 1.75 (m, 12 H) 1.57 (br. s., 4 H) 1.49 (br. s., 3 H)

1.29 - 1.45 (m, 1 H) 1.08 - 1.25 (m, 4 H) 1.02 (br. s., 1 H) 0.88 - 0.99 (m, 9 H) 0.80 (br. s., 3 H); **m/z** calcd C<sub>38</sub>H<sub>67</sub>N<sub>7</sub> [M+H]<sup>+</sup> 622.55, found (MS ESI) 622.5. **Purity** LCMS: 97.72% (TIC), 99% (214 nm, peak area); **RT** = 4.72 min

**8: (R)-3-((4-(tert-butyl)cyclohexyl)methyl)-1-((R)-1-cyclohexyl-3-((S)-2-(((R)-2-imino-5-isobutylimidazolidin-1-yl)methyl)pyrrolidin-1-yl)propan-2-yl)-4-isopropylimidazolidin-2-imine.** Using General Scheme (scheme 1) for the synthesis of bis-cyclic guanidines compound 2509-11 was synthesized using the following reagents: Boc-D-Leucine-OH·H<sub>2</sub>O (R1), Boc-D-Cyclohexylalanine-OH (R2), Boc-D-Valine-OH (R3), 4-tert-butyl-cyclohexanecarboxylic acid (R4). The final crude product was purified using HPLC as described above, with a gradient of (B) 2, 0/2, 2/2, 6/20, 30/50. **1H NMR** (400 MHz, CHLOROFORM-*d*) δ ppm 8.63 (br. s., 2 H) 4.15 (br. s., 1 H) 3.97 (br. s., 1 H) 3.86 (br. s., 1 H) 3.73 (br. s., 3 H) 3.36 - 3.58 (m, 2 H) 3.28 (br. s., 3 H) 3.17 (d, *J*=14.79 Hz, 1 H) 3.01 (br. s., 1 H) 2.92 (d, *J*=18.46 Hz, 2 H) 2.39 - 2.59 (m, 2 H) 2.14 (br. s., 2 H) 1.76 - 1.92 (m, 5 H) 1.71 (br. s., 2 H) 1.66 (br. s., 3 H) 1.52 - 1.62 (m, 5 H) 1.48 (br. s., 2 H) 1.43 (br. s., 2 H) 0.95 - 1.22 (m, 14 H) 0.92 (br. s., 4 H) 0.84 (br. s., 11 H); **m/z** calcd C<sub>38</sub>H<sub>71</sub>N<sub>7</sub> [M+H]<sup>+</sup> 626.58, found (MS ESI) 626.55. **Purity** LCMS: 98.51% (TIC), 99% (214 nm, peak area); **RT** = 4.92 min

**9: (R)-1-((R)-1-cyclohexyl-3-((S)-2-(((R)-2-imino-5-isobutylimidazolidin-1-yl)methyl)pyrrolidin-1-yl)propan-2-yl)-4-isopropyl-3-(4-methylpentyl)imidazolidin-2-imine.** Using General Scheme (scheme 1) for the synthesis of bis-cyclic guanidines compound 2509-12 was synthesized using the following reagents: Boc-D-Leucine-OH·H<sub>2</sub>O (R1), Boc-D-Cyclohexylalanine-OH (R2), Boc-D-Valine-OH (R3), 4-Methylvaleric acid (R4). The final crude product was purified using HPLC as described above, with a gradient of (B) 2, 0/2, 2/2, 6/20, 25/45 **1H NMR** (400 MHz, CHLOROFORM-*d*) δ ppm 8.62 (br. s., 2 H) 4.09 (br. s., 1 H) 3.87 (br. s., 1 H) 3.73 (br. s., 3 H) 3.35 - 3.59 (m, 2 H) 3.26 (br. s., 3 H) 3.14 (d, *J*=14.43 Hz, 1 H) 3.06 (br. s., 1 H) 2.81 - 2.98 (m, 2 H) 2.40 - 2.52 (m, 2 H) 2.16 (br. s., 1 H) 1.87 (br. s., 1 H) 1.82 (br. s., 2 H) 1.68 (d, *J*=17.61 Hz, 4 H) 1.57 (br. s., 4 H) 1.35 - 1.53 (m, 5 H) 1.18 (br. s., 6 H) 0.97 (br. s., 7 H) 0.75 - 0.93 (m, 12 H); **m/z** calcd C<sub>33</sub>H<sub>63</sub>N<sub>7</sub> [M+H]<sup>+</sup> 558.51, found (MS ESI) 558.45. **Purity** LCMS: 96.02% (TIC), 98% (214 nm, peak area); **RT** = 4.49 min

**10: (R)-1-((S)-3-(adamantan-1-ylmethyl)-2-imino-1-((R)-1-((S)-2-(((R)-2-imino-5-isobutylimidazolidin-1-yl)methyl)pyrrolidin-1-yl)-3-phenylpropan-2-yl)imidazolidin-4-yl)ethanol.** Using General Scheme (scheme 1) for the synthesis of bis-cyclic guanidines compound 2509-13 was synthesized using the following reagents: Boc-D-Leucine-OH·H<sub>2</sub>O (R1), Boc-D-Phenylalanine-OH (R2), Boc-D-Threonine(Bzl)-OH (R3), 1-Adamantanecarboxylic acid (R4). The final crude product was purified using HPLC as described above, with a gradient of (B) 2, 0/2, 2/2, 6/20, 25/45. **1H NMR** (400 MHz, CHLOROFORM-*d*) δ ppm 10.14 (br. s., 1 H) 8.94 (br. s., 1 H) 8.63 (br. s., 2 H) 8.38 (br. s., 1 H) 7.35 (br. s., 2 H) 7.21 (br. s., 2 H) 4.74 (br. s., 1 H) 4.04 (br. s., 3 H) 3.84 (br. s., 2 H) 3.67 (br. s., 1 H) 3.58 (br. s., 1 H) 3.51 (br. s., 1 H) 3.42 (br. s., 1 H) 3.36 (br. s., 1 H) 3.21 - 3.33 (m, 2 H) 2.92 - 3.19 (m, 3 H) 2.70 (d, *J*=16.63 Hz, 3 H) 2.47 (d, *J*=11.13 Hz, 1 H) 2.33 (br. s., 1 H) 1.78 - 1.93 (m, 3 H) 1.64 (s, 3 H) 1.67 (s, 2 H) 1.50 - 1.60 (m, 5 H) 1.41 - 1.50 (m, 1 H) 1.30 - 1.41 (m, 3 H) 1.16 - 1.27 (m, 3 H) 1.11 (br. s., 3 H) 1.00 (br. s., 3 H) 0.94 (br. s., 3 H); **m/z** calcd C<sub>37</sub>H<sub>59</sub>N<sub>7</sub>O [M+H]<sup>+</sup> 618.48, found (MS ESI) 618.45. **Purity** LCMS: 98.23% (TIC), 99% (214 nm, peak area); **RT** = 4.12 min

**11: (R)-1-((S)-3-((4-(tert-butyl)cyclohexyl)methyl)-2-imino-1-((R)-1-((S)-2-(((R)-2-imino-5-isobutylimidazolidin-1-yl)methyl)pyrrolidin-1-yl)-3-phenylpropan-2-yl)imidazolidin-4-**

**yl)ethanol.** Using General Scheme (scheme 1) for the synthesis of bis-cyclic guanidines compound 2509-14 was synthesized using the following reagents: Boc-D-Leucine-OH·H<sub>2</sub>O (R1), Boc-D-Phenylalanine-OH (R2), Boc-D-Threonine(Bzl)-OH (R3), 4-tert-butylcyclohexanecarboxylic acid (R4). The final crude product was purified using HPLC as described above, with a gradient of (B) 2, 0/2, 2/2, 6/20, 25/40. **<sup>1</sup>H NMR** (400 MHz, CHLOROFORM-*d*) δ ppm 8.62 (br. s., 2 H) 7.23 (br. s., 2 H) 4.69 (br. s., 1 H) 3.94 (br. s., 3 H) 3.79 (br. s., 1 H) 3.74 (br. s., 1 H) 3.68 (br. s., 1 H) 3.60 (br. s., 2 H) 3.39 - 3.55 (m, 2 H) 3.30 (br. s., 2 H) 3.11 (br. s., 1 H) 2.99 (d, *J*=13.20 Hz, 3 H) 2.61 - 2.85 (m, 2 H) 2.46 (d, *J*=11.49 Hz, 1 H) 2.34 (br. s., 1 H) 1.79 - 1.99 (m, 2 H) 1.69 (br. s., 2 H) 1.36 - 1.63 (m, 7 H) 1.26 (br. s., 2 H) 1.15 (br. s., 3 H) 1.00 (br. s., 4 H) 0.86 - 0.97 (m, 5 H) 0.83 (br. s., 9 H); ***m/z*** calcd C<sub>37</sub>H<sub>63</sub>N<sub>7</sub>O [M+H]<sup>+</sup> 622.51, found (MS ESI) 622.5. **Purity** LCMS: 98.73% (TIC), 99% (214 nm, peak area); **RT** = 4.33 min

**12: (R)-1-((S)-2-imino-1-((R)-1-((S)-2-(((R)-2-imino-5-isobutylimidazolidin-1-yl)methyl)pyrrolidin-1-yl)-3-phenylpropan-2-yl)-3-(4-methylpentyl)imidazolidin-4-yl)ethanol.** Using General Scheme (scheme 1) for the synthesis of bis-cyclic guanidines compound 2509-15 was synthesized using the following reagents: Boc-D-Leucine-OH·H<sub>2</sub>O (R1), Boc-D-Phenylalanine-OH (R2), Boc-D-Threonine(Bzl)-OH (R3), 4-Methylvaleric acid (R4). The final crude product was purified using HPLC as described above, with a gradient of (B) 2, 0/2, 2/2, 6/20, 25/45. **<sup>1</sup>H NMR** (400 MHz, CHLOROFORM-*d*) δ ppm 10.01 (br. s., 1 H) 9.01 (br. s., 1 H) 8.59 (br. s., 2 H) 7.29 (br. s., 2 H) 7.23 (br. s., 2 H) 4.61 (br. s., 1 H) 4.14 (br. s., 2 H) 3.90 (br. s., 2 H) 3.78 (br. s., 1 H) 3.60 - 3.75 (m, 2 H) 3.38 - 3.59 (m, 3 H) 3.27 (br. s., 2 H) 3.12 (br. s., 2 H) 2.97 (br. s., 2 H) 2.74 (d, *J*=12.96 Hz, 2 H) 2.46 (d, *J*=12.35 Hz, 1 H) 2.40 (br. s., 1 H) 1.87 (br. s., 1 H) 1.72 (br. s., 2 H) 1.54 (d, *J*=11.74 Hz, 3 H) 1.40 - 1.50 (m, 2 H) 1.35 (br. s., 1 H) 1.24 (br. s., 1 H) 1.13 (br. s., 3 H) 0.99 (br. s., 4 H) 0.93 (br. s., 3 H) 0.86 (br. s., 5 H); ***m/z*** calcd C<sub>32</sub>H<sub>55</sub>N<sub>7</sub>O [M+H]<sup>+</sup> 554.45, found (MS ESI) 554.4. **Purity** LCMS: 98.87% (TIC), 99% (214 nm, peak area); **RT** = 3.86 min

**13: (R)-3-(adamantan-1-ylmethyl)-1-((R)-1-((S)-2-(((R)-2-imino-5-isobutylimidazolidin-1-yl)methyl)pyrrolidin-1-yl)-3-phenylpropan-2-yl)-4-propylimidazolidin-2-imine.** Using General Scheme (scheme 1) for the synthesis of bis-cyclic guanidines compound 2509-16 was synthesized using the following reagents: Boc-D-Leucine-OH·H<sub>2</sub>O (R1), Boc-D-Phenylalanine-OH (R2), Boc-D-Norvaline-OH (R3), 1-Adamantanecarboxylic acid (R4). The final crude product was purified using HPLC as described above, with a gradient of (B) 2, 0/2, 2/2, 6/20, 30/35. **<sup>1</sup>H NMR** (400 MHz, CHLOROFORM-*d*) δ ppm 10.74 (br. s., 1 H) 9.43 (br. s., 1 H) 8.66 (br. s., 2 H) 7.40 (br. s., 2 H) 7.29 (br. s., 2 H) 7.21 (br. s., 1 H) 4.75 (br. s., 1 H) 3.73 (br. s., 4 H) 3.58 (br. s., 2 H) 3.27 (br. s., 4 H) 3.20 (br. s., 1 H) 3.10 (d, *J*=13.94 Hz, 1 H) 2.99 (br. s., 2 H) 2.77 (t, *J*=11.80 Hz, 1 H) 2.47 - 2.70 (m, 3 H) 2.00 (br. s., 1 H) 1.90 (br. s., 3 H) 1.74 - 1.86 (m, 2 H) 1.66 (d, *J*=11.62 Hz, 4 H) 1.49 - 1.60 (m, 5 H) 1.28 - 1.46 (m, 4 H) 1.22 (br. s., 5 H) 0.88 - 1.07 (m, 8 H); ***m/z*** calcd C<sub>38</sub>H<sub>61</sub>N<sub>7</sub> [M+H]<sup>+</sup> 616.50, found (MS ESI) 616.5. **Purity** LCMS: 98.41% (TIC), 99% (214 nm, peak area); **RT** = 4.50 min

**14: (R)-3-((4-(tert-butyl)cyclohexyl)methyl)-1-((R)-1-((S)-2-(((R)-2-imino-5-isobutylimidazolidin-1-yl)methyl)pyrrolidin-1-yl)-3-phenylpropan-2-yl)-4-propylimidazolidin-2-imine.** Using General Scheme (scheme 1) for the synthesis of bis-cyclic guanidines compound 2509-17 was synthesized using the following reagents: Boc-D-Leucine-OH·H<sub>2</sub>O (R1), Boc-D-Phenylalanine-OH (R2), Boc-D-Norvaline-OH (R3), 4-tert-butylcyclohexanecarboxylic acid (R4). The final crude product was purified using HPLC as

described above, with a gradient of (B). **<sup>1</sup>H NMR** (400 MHz, CHLOROFORM-*d*) δ ppm 8.65 (br. s., 2 H) 7.35 (br. s., 3 H) 7.22 (br. s., 1 H) 4.70 (br. s., 1 H) 3.73 (br. s., 3 H) 3.48 - 3.68 (m, 3 H) 3.25 - 3.45 (m, 3 H) 3.16 - 3.25 (m, 1 H) 3.01 - 3.15 (m, 2 H) 2.98 (br. s., 1 H) 2.89 (d, *J*=14.79 Hz, 1 H) 2.73 - 2.85 (m, 1 H) 2.62 (d, *J*=11.37 Hz, 2 H) 1.86 - 1.99 (m, 1 H) 1.81 (br. s., 3 H) 1.66 (br. s., 1 H) 1.48 - 1.62 (m, 4 H) 1.33 - 1.47 (m, 3 H) 1.24 (br. s., 3 H) 1.05 - 1.19 (m, 1 H) 0.88 - 1.02 (m, 11 H) 0.84 (br. s., 9 H); ***m/z*** calcd C<sub>38</sub>H<sub>65</sub>N<sub>7</sub> [M+H]<sup>+</sup> 620.53, found (MS ESI) 620.5. **Purity** LCMS: 98.68% (TIC), 99% (214 nm, peak area); **RT** = 4.69 min

**15: (R)-1-((R)-1-((S)-2-(((R)-2-imino-5-isobutylimidazolidin-1-yl)methyl)pyrrolidin-1-yl)-3-phenylpropan-2-yl)-3-(4-methylpentyl)-4-propylimidazolidin-2-imine.** Using General Scheme (scheme 1) for the synthesis of bis-cyclic guanidines compound 2509-18 was synthesized using the following reagents: Boc-D-Leucine-OH·H<sub>2</sub>O (R1), Boc-D-Phenylalanine-OH (R2), Boc-D-Norvaline-OH (R3), 4-Methylvaleric acid (R4). The final crude product was purified using HPLC as described above, with a gradient of (B) 2, 0/2, 2/2, 6/20, 30/30. **<sup>1</sup>H NMR** (400 MHz, CHLOROFORM-*d*) δ ppm 10.53 (br. s., 1 H) 9.34 (br. s., 1 H) 8.61 (br. s., 2 H) 7.30 (br. s., 2 H) 7.20 (br. s., 2 H) 4.54 (br. s., 1 H) 4.08 (br. s., 1 H) 3.72 (br. s., 2 H) 3.56 (br. s., 2 H) 3.45 (br. s., 1 H) 3.14 - 3.39 (m, 4 H) 2.89 - 3.09 (m, 4 H) 2.72 - 2.89 (m, 1 H) 2.60 (d, *J*=14.06 Hz, 2 H) 1.90 (br. s., 1 H) 1.78 (br. s., 2 H) 1.65 (br. s., 1 H) 1.33 - 1.60 (m, 5 H) 1.22 (br. s., 4 H) 0.91 (s, 5 H) 0.95 (s, 5 H) 0.83 (br. s., 5 H); ***m/z*** calcd C<sub>33</sub>H<sub>57</sub>N<sub>7</sub> [M+H]<sup>+</sup> 552.47, found (MS ESI) 552.4. **Purity** LCMS: 98.02% (TIC), 99% (214 nm, peak area); **RT** = 4.29 min

**16: (R)-3-(adamantan-1-ylmethyl)-1-((R)-1-((S)-2-(((R)-2-imino-5-isobutylimidazolidin-1-yl)methyl)pyrrolidin-1-yl)-3-phenylpropan-2-yl)-4-isopropylimidazolidin-2-imine.** Using General Scheme (scheme 1) for the synthesis of bis-cyclic guanidines compound 2509-19 was synthesized using the following reagents: Boc-D-Leucine-OH·H<sub>2</sub>O (R1), Boc-D-Phenylalanine-OH (R2), Boc-D-Valine-OH (R3), 1-Adamantanecarboxylic acid (R4). The final crude product was purified using HPLC as described above, with a gradient of (B) 2, 0/2, 2/2, 6/20, 30/30, 35/35. **<sup>1</sup>H NMR** (400 MHz, CHLOROFORM-*d*) δ ppm 10.00 (br. s., 1 H) 9.13 (br. s., 1 H) 8.64 (br. s., 1 H) 7.42 (br. s., 2 H) 7.29 (br. s., 1 H) 7.20 (br. s., 2 H) 4.71 (br. s., 1 H) 3.75 (br. s., 2 H) 3.70 (br. s., 1 H) 3.50 (br. s., 2 H) 3.32 - 3.45 (m, 3 H) 3.27 (br. s., 3 H) 3.13 (d, *J*=14.18 Hz, 1 H) 3.02 (br. s., 2 H) 2.77 - 2.95 (m, 1 H) 2.48 - 2.74 (m, 3 H) 2.15 (br. s., 1 H) 2.01 (br. s., 1 H) 1.89 (br. s., 3 H) 1.79 (br. s., 2 H) 1.63 (br. s., 3 H) 1.55 (br. s., 5 H) 1.37 (d, *J*=11.00 Hz, 4 H) 1.10 - 1.30 (m, 3 H) 0.83 - 1.04 (m, 8 H) 0.74 (br. s., 3 H); ***m/z*** calcd C<sub>38</sub>H<sub>61</sub>N<sub>7</sub> [M+H]<sup>+</sup> 616.50, found (MS ESI) 616.45. **Purity** LCMS: 98.05% (TIC), 98% (214 nm, peak area); **RT** = 4.51 min

**17: (R)-3-(((4-(tert-butyl)cyclohexyl)methyl)-1-((R)-1-((S)-2-(((R)-2-imino-5-isobutylimidazolidin-1-yl)methyl)pyrrolidin-1-yl)-3-phenylpropan-2-yl)-4-isopropylimidazolidin-2-imine.** Using General Scheme (scheme 1) for the synthesis of bis-cyclic guanidines compound 2509-20 was synthesized using the following reagents: Boc-D-Leucine-OH·H<sub>2</sub>O (R1), Boc-D-Phenylalanine-OH (R2), Boc-D-Valine-OH (R3), 4-tert-butylcyclohexanecarboxylic acid (R4). The final crude product was purified using HPLC as described above, with a gradient of (B) 2, 0/2, 2/2, 6/20, 30/30. **<sup>1</sup>H NMR** (400 MHz, CHLOROFORM-*d*) δ ppm 8.64 (br. s., 2 H) 7.32 (br. s., 2 H) 7.20 (br. s., 2 H) 4.63 (br. s., 1 H) 3.69 (d, *J*=9.90 Hz, 3 H) 3.56 (br. s., 1 H) 3.41 (br. s., 1 H) 3.27 - 3.37 (m, 1 H) 3.23 (br. s., 3 H) 3.07 (d, *J*=13.69 Hz, 1 H) 2.94 (br. s., 2 H) 2.71 - 2.90 (m, 2 H) 2.46 - 2.69 (m, 2 H) 2.00 (br. s., 1 H) 1.90 (br. s., 1 H) 1.78 (br. s., 3 H) 1.44 - 1.65 (m, 4 H) 1.37 (d, *J*=15.65 Hz, 3 H) 1.23 (br. s., 1 H) 1.03 - 1.17 (m, 1 H) 0.96 (br. s., 4 H) 0.90 (br. s., 7 H) 0.82 (br. s., 9 H) 0.75 (br. s., 4 H);

**m/z** calcd C<sub>38</sub>H<sub>65</sub>N<sub>7</sub> [M+H]<sup>+</sup> 620.53, found (MS ESI) 620.5. **Purity** LCMS: 98.57% (TIC), 99% (214 nm, peak area); **RT** = 4.71 min

**18: (R)-1-((R)-1-((S)-2-(((R)-2-imino-5-isobutylimidazolidin-1-yl)methyl)pyrrolidin-1-yl)-3-phenylpropan-2-yl)-4-isopropyl-3-(4-methylpentyl)imidazolidin-2-imine.** Using General Scheme (scheme 1) for the synthesis of bis-cyclic guanidines compound 2509-21 was synthesized using the following reagents: Boc-D-Leucine-OH·H<sub>2</sub>O (R1), Boc-D-Phenylalanine-OH (R2), Boc-D-Valine-OH (R3), 4-Methylvaleric acid (R4). The final crude product was purified using HPLC as described above, with a gradient of (B) 2, 0/2, 2/2, 6/20, 30/30. **<sup>1</sup>H NMR** (400 MHz, DMSO-*d*<sub>6</sub>): δ 8.5 (br. s., 2 H) 7.4 (d, *J*=7.1 Hz, 4 H) 7.2-7.3 (m, 17 H) 7.2 (d, *J*=7.2 Hz, 6 H) 3.7-3.9 (m, 5 H) 3.7 (d, *J*=9.4 Hz, 2 H) 3.5 (d, *J*=12.7 Hz, 3 H) 3.3 (d, *J*=12.6 Hz, 4 H) 3.1 (d, *J*=12.8 Hz, 2 H) 2.9-3.0 (m, 7 H) 2.7-2.9 (m, 11 H) 2.6 (br. s., 4 H) 2.0-2.2 (m, 4 H) 1.9 (d, *J*=11.74 Hz, 4 H) 1.5-1.7 (m, 12 H) 1.2 (br. s., 5 H) 1.2 (br. s., 6 H) 0.8-1.1 (m, 4 H) **<sup>13</sup>C NMR** (100 MHz, DMSO-*d*<sub>6</sub>) δ 158.0, 157.8, 157.3, 156.8, 139.2, 137.9, 137.7, 129.8, 129.4, 129.1, 129.0, 128.8, 127.3, 127.1, 126.8, 62.8, 58.5, 55.6, 53.8, 51.2, 48.4, 40.7, 40.5, 37.9, 37.8, 37.5, 34.5, 33.6, 33.5, 32.8, 29.6, 26.6, 26.3, 26.1, 22.8; **m/z** calcd C<sub>33</sub>H<sub>57</sub>N<sub>7</sub> [M+H]<sup>+</sup> 552.47, found (MS ESI) 552.45. **Purity** LCMS: 97.09% (TIC), 99% (214 nm, peak area); **RT** = 4.26 min

**19: (R)-1-((S)-3-(adamantan-1-ylmethyl)-1-((R)-1-cyclohexyl-3-((S)-2-(((R)-2-imino-5-isopropylimidazolidin-1-yl)methyl)pyrrolidin-1-yl)propan-2-yl)-2-iminoimidazolidin-4-yl)ethanol.** Using General Scheme (scheme 1) for the synthesis of bis-cyclic guanidines compound 2509-22 was synthesized using the following reagents: Boc-D-Valine-OH (R1), Boc-D-Cyclohexylalanine-OH (R2), Boc-D-Threonine(Bzl)-OH (R3), 1-Adamantanecarboxylic acid (R4). The final crude product was purified using HPLC as described above, with a gradient of (B) 2, 0/2, 2/2, 6/20, 30/30. **<sup>1</sup>H NMR** (400 MHz, CHLOROFORM-*d*) δ ppm 10.01 (br. s., 1 H) 8.74 - 9.01 (m, 1 H) 8.58 (br. s., 2 H) 4.27 (br. s., 2 H) 4.06 (br. s., 2 H) 3.92 (br. s., 1 H) 3.79 (br. s., 1 H) 3.59 (d, *J*=15.04 Hz, 1 H) 3.42 - 3.54 (m, 3 H) 3.38 (br. s., 1 H) 3.18 (d, *J*=16.63 Hz, 2 H) 2.95 (d, *J*=14.79 Hz, 1 H) 2.78 (br. s., 1 H) 2.69 (br. s., 1 H) 2.30 (br. s., 2 H) 2.06 (br. s., 1 H) 1.97 (br. s., 3 H) 1.82 (br. s., 1 H) 1.69 (br. s., 6 H) 1.43 - 1.65 (m, 11 H) 1.33 (br. s., 1 H) 1.15 (br. s., 6 H) 0.98 (d, *J*=11.74 Hz, 2 H) 0.90 (br. s., 3 H) 0.84 (br. s., 3 H); **m/z** calcd C<sub>36</sub>H<sub>63</sub>N<sub>7</sub>O [M+H]<sup>+</sup> 610.51, found (MS ESI) 610.5. **Purity** LCMS: 97.44% (TIC), 99% (214 nm, peak area); **RT** = 4.11 min

**20: (R)-1-((S)-3-((4-(tert-butyl)cyclohexyl)methyl)-1-((R)-1-cyclohexyl-3-((S)-2-(((R)-2-imino-5-isopropylimidazolidin-1-yl)methyl)pyrrolidin-1-yl)propan-2-yl)-2-iminoimidazolidin-4-yl)ethanol.** Using General Scheme (scheme 1) for the synthesis of bis-cyclic guanidines compound 2509-23 was synthesized using the following reagents: Boc-D-Valine-OH (R1), Boc-D-Cyclohexylalanine-OH (R2), Boc-D-Threonine(Bzl)-OH (R3), 4-tert-butyl-cyclohexanecarboxylic acid (R4). The final crude product was purified using HPLC as described above, with a gradient of (B) 2, 0/2, 2/2, 6/20, 30/30. **<sup>1</sup>H NMR** (400 MHz, CHLOROFORM-*d*) δ ppm 8.58 (br. s., 2 H) 4.05 - 4.34 (m, 3 H) 3.98 (br. s., 2 H) 3.88 (br. s., 1 H) 3.80 (br. s., 2 H) 3.42 - 3.65 (m, 3 H) 3.40 (br. s., 1 H) 3.31 (br. s., 1 H) 3.18 (br. s., 2 H) 2.69 - 2.87 (m, 2 H) 2.34 (d, *J*=13.08 Hz, 2 H) 2.19 (br. s., 1 H) 2.08 (br. s., 1 H) 1.78 - 1.97 (m, 2 H) 1.71 (br. s., 4 H) 1.48 - 1.67 (m, 6 H) 1.42 (br. s., 1 H) 1.34 (br. s., 1 H) 1.05 - 1.23 (m, 8 H) 0.96 (br. s., 3 H) 0.90 (br. s., 4 H) 0.83 (br. s., 11 H); **m/z** calcd C<sub>36</sub>H<sub>67</sub>N<sub>7</sub>O [M+H]<sup>+</sup> 614.54, found (MS ESI) 614.55. **Purity** LCMS: 98.01% (TIC), 99% (214 nm, peak area); **RT** = 4.35 min

**21: (R)-1-((S)-1-((R)-1-cyclohexyl-3-((S)-2-(((R)-2-imino-5-isopropylimidazolidin-1-yl)methyl)pyrrolidin-1-yl)propan-2-yl)-2-imino-3-(4-methylpentyl)imidazolidin-4-yl)ethanol.** Using General Scheme (scheme 1) for the synthesis of bis-cyclic guanidines compound 2509-24 was synthesized using the following reagents: Boc-D-Valine-OH (R1), Boc-D-Cyclohexylalanine-OH (R2), Boc-D-Threonine(Bzl)-OH (R3), 4-Methylvaleric acid (R4). The final crude product was purified using HPLC as described above, with a gradient of (B) 2, 0/2, 2/2, 6/20, 30/30. **<sup>1</sup>H NMR** (400 MHz, CHLOROFORM-*d*) δ ppm 9.05 (br. s., 1 H) 8.59 (br. s., 2 H) 4.21 (br. s., 3 H) 3.95 (br. s., 2 H) 3.80 (br. s., 3 H) 3.55 (br. s., 1 H) 3.48 (br. s., 1 H) 3.30 - 3.44 (m, 3 H) 3.20 (br. s., 2 H) 2.77 (br. s., 2 H) 2.26 - 2.48 (m, 2 H) 2.07 (br. s., 1 H) 1.87 (br. s., 2 H) 1.72 (br. s., 3 H) 1.63 (br. s., 3 H) 1.49 - 1.59 (m, 3 H) 1.42 (br. s., 1 H) 1.36 (br. s., 1 H) 1.17 (br. s., 8 H) 0.99 (br. s., 1 H) 0.76 - 0.95 (m, 12 H); **m/z** calcd C<sub>31</sub>H<sub>59</sub>N<sub>7</sub>O [M+H]<sup>+</sup> 546.48, found (MS ESI) 546.45. **Purity** LCMS: 97.57% (TIC), 99% (214 nm, peak area); **RT** = 3.88 min

**22: (R)-3-(adamantan-1-ylmethyl)-1-((R)-1-cyclohexyl-3-((S)-2-(((R)-2-imino-5-isopropylimidazolidin-1-yl)methyl)pyrrolidin-1-yl)propan-2-yl)-4-propylimidazolidin-2-imine.** Using General Scheme (scheme 1) for the synthesis of bis-cyclic guanidines compound 2509-25 was synthesized using the following reagents: Boc-D-Valine-OH (R1), Boc-D-Cyclohexylalanine-OH (R2), Boc-D-Norvaline-OH (R3), 1-Adamantanecarboxylic acid (R4). The final crude product was purified using HPLC as described above, with a gradient of (B) 2, 0/2, 2/2, 6/20, 30/30. **<sup>1</sup>H NMR** (400 MHz, CHLOROFORM-*d*) δ ppm 10.54 (br. s., 1 H) 9.28 (br. s., 1 H) 8.61 (br. s., 2 H) 4.16 (br. s., 1 H) 3.93 (br. s., 1 H) 3.75 (br. s., 1 H) 3.48 - 3.60 (m, 3 H) 3.33 - 3.46 (m, 2 H) 3.25 (br. s., 1 H) 3.06 - 3.22 (m, 2 H) 2.92 (br. s., 1 H) 2.80 (br. s., 1 H) 2.71 (d, *J*=15.28 Hz, 1 H) 2.48 - 2.55 (m, 1 H) 2.44 (d, *J*=13.08 Hz, 1 H) 2.06 (br. s., 1 H) 1.97 (br. s., 3 H) 1.83 - 1.93 (m, 2 H) 1.78 (br. s., 3 H) 1.68 (br. s., 5 H) 1.59 (s, 3 H) 1.63 (s, 4 H) 1.54 (br. s., 4 H) 1.40 (br. s., 3 H) 1.24 - 1.34 (m, 2 H) 1.07 - 1.23 (m, 4 H) 0.92 - 1.06 (m, 4 H) 0.89 (br. s., 3 H) 0.81 (br. s., 3 H); **m/z** calcd C<sub>37</sub>H<sub>65</sub>N<sub>7</sub> [M+H]<sup>+</sup> 608.53, found (MS ESI) 608.5. **Purity** LCMS: 96.94% (TIC), 98% (214 nm, peak area); **RT** = 4.55 min

**23: (R)-3-((4-(tert-butyl)cyclohexyl)methyl)-1-((R)-1-cyclohexyl-3-((S)-2-(((R)-2-imino-5-isopropylimidazolidin-1-yl)methyl)pyrrolidin-1-yl)propan-2-yl)-4-propylimidazolidin-2-imine.** Using General Scheme (scheme 1) for the synthesis of bis-cyclic guanidines compound 2509-26 was synthesized using the following reagents: Boc-D-Valine-OH (R1), Boc-D-Cyclohexylalanine-OH (R2), Boc-D-Norvaline-OH (R3), 4-tert-butyl-cyclohexanecarboxylic acid (R4). The final crude product was purified using HPLC as described above, with a gradient of (B) 2, 0/2, 2/2, 6/20, 30/30. **<sup>1</sup>H NMR** (400 MHz, CHLOROFORM-*d*) δ ppm 8.60 (br. s., 2 H) 4.16 (br. s., 1 H) 3.87 (br. s., 1 H) 3.76 (br. s., 2 H) 3.58 (br. s., 2 H) 3.33 - 3.49 (m, 2 H) 3.27 (br. s., 1 H) 3.10 - 3.21 (m, 2 H) 3.03 (d, *J*=13.82 Hz, 1 H) 2.91 (br. s., 1 H) 2.81 (br. s., 1 H) 2.53 (br. s., 1 H) 2.44 (d, *J*=12.84 Hz, 1 H) 2.07 (br. s., 2 H) 1.86 (br. s., 2 H) 1.78 (br. s., 3 H) 1.71 (br. s., 2 H) 1.62 (br. s., 2 H) 1.46 - 1.59 (m, 5 H) 1.40 (br. s., 3 H) 1.31 (br. s., 2 H) 1.06 - 1.22 (m, 5 H) 0.96 (br. s., 5 H) 0.90 (br. s., 4 H) 0.83 (br. s., 12 H); **m/z** calcd C<sub>37</sub>H<sub>69</sub>N<sub>7</sub> [M+H]<sup>+</sup> 612.56, found (MS ESI) 612.55. **Purity** LCMS: 97.60% (TIC), 98% (214 nm, peak area); **RT** = 4.78 min

**24: (R)-1-((R)-1-cyclohexyl-3-((S)-2-(((R)-2-imino-5-isopropylimidazolidin-1-yl)methyl)pyrrolidin-1-yl)propan-2-yl)-3-(4-methylpentyl)-4-propylimidazolidin-2-imine.** Using General Scheme (scheme 1) for the synthesis of bis-cyclic guanidines compound 2509-27 was synthesized using the following reagents: Boc-D-Valine-OH (R1), Boc-D-



Cyclohexylalanine-OH (R2), Boc-D-Norvaline-OH (R3), 4-Methylvaleric acid (R4). The final crude product was purified using HPLC as described above, with a gradient of (B) 2, 0/2, 2/2, 6/20, 30/30. **<sup>1</sup>H NMR** (400 MHz, CHLOROFORM-*d*) δ ppm 10.43 (br. s., 1 H) 8.59 (br. s., 2 H) 4.14 (br. s., 2 H) 3.79 (br. s., 2 H) 3.69 (br. s., 1 H) 3.59 (br. s., 2 H) 3.35 - 3.52 (m, 2 H) 3.26 (br. s., 1 H) 3.06 - 3.22 (m, 3 H) 2.94 (br. s., 1 H) 2.84 (br. s., 1 H) 2.53 (br. s., 1 H) 2.45 (d, *J*=13.08 Hz, 1 H) 2.09 (br. s., 1 H) 1.80 (br. s., 4 H) 1.70 (br. s., 2 H) 1.64 (br. s., 2 H) 1.38 - 1.60 (m, 6 H) 1.32 (br. s., 2 H) 1.17 (br. s., 6 H) 0.93 - 1.05 (m, 5 H) 0.73 - 0.93 (m, 12 H); ***m/z*** calcd C<sub>32</sub>H<sub>61</sub>N<sub>7</sub> [M+H]<sup>+</sup> 544.50, found (MS ESI) 544.45. **Purity** LCMS: 98.63% (TIC), 99% (214 nm, peak area); **RT** = 4.34 min

**25: (R)-3-(adamantan-1-ylmethyl)-1-((R)-1-cyclohexyl-3-((S)-2-(((R)-2-imino-5-isopropylimidazolidin-1-yl)methyl)pyrrolidin-1-yl)propan-2-yl)-4-isopropylimidazolidin-2-imine.** Using General Scheme (scheme 1) for the synthesis of bis-cyclic guanidines compound 2509-28 was synthesized using the following reagents: Boc-D-Valine-OH (R1), Boc-D-Cyclohexylalanine-OH (R2), Boc-D-Valine-OH (R3), 1-Adamantanecarboxylic acid (R4). The final crude product was purified using HPLC as described above, with a gradient of (B) 2, 0/2, 2/2, 6/20, 30/30 **<sup>1</sup>H NMR** (400 MHz, CHLOROFORM-*d*) δ ppm 10.42 (br. s., 1 H) 9.18 (br. s., 1 H) 8.62 (br. s., 2 H) 4.08 (br. s., 1 H) 3.99 (br. s., 1 H) 3.77 (br. s., 1 H) 3.55 - 3.68 (m, 1 H) 3.53 (br. s., 1 H) 3.47 (br. s., 1 H) 3.36 (br. s., 1 H) 3.26 (br. s., 2 H) 3.12 (d, *J*=14.67 Hz, 1 H) 2.92 (br. s., 1 H) 2.81 (br. s., 1 H) 2.71 (d, *J*=15.77 Hz, 1 H) 2.37 - 2.53 (m, 2 H) 2.25 (br. s., 1 H) 2.05 (br. s., 1 H) 1.98 (br. s., 3 H) 1.88 (br. s., 2 H) 1.80 (br. s., 2 H) 1.59 - 1.75 (m, 11 H) 1.36 - 1.59 (m, 6 H) 1.08 - 1.29 (m, 4 H) 1.02 (br. s., 1 H) 0.89 (s, 3 H) 0.93 (s, 3 H) 0.80 (br. s., 5 H); ***m/z*** calcd C<sub>37</sub>H<sub>65</sub>N<sub>7</sub> [M+H]<sup>+</sup> 608.53, found (MS ESI) 608.55. **Purity** LCMS: 96.79% (TIC), 99% (214 nm, peak area); **RT** = 4.55 min

**26: (R)-3-((4-(tert-butyl)cyclohexyl)methyl)-1-((R)-1-cyclohexyl-3-((S)-2-(((R)-2-imino-5-isopropylimidazolidin-1-yl)methyl)pyrrolidin-1-yl)propan-2-yl)-4-isopropylimidazolidin-2-imine.** Using General Scheme (scheme 1) for the synthesis of bis-cyclic guanidines compound 2509-29 was synthesized using the following reagents: Boc-D-Valine-OH (R1), Boc-D-Cyclohexylalanine-OH (R2), Boc-D-Valine-OH (R3), 4-tert-butyl-cyclohexanecarboxylic acid (R4). The final crude product was purified using HPLC as described above, with a gradient of (B) 2, 0/2, 2/2, 6/20, 30/30. **<sup>1</sup>H NMR** (400 MHz, CHLOROFORM-*d*) δ ppm 8.61 (br. s., 2 H) 4.06 (br. s., 1 H) 3.86 - 3.99 (m, 1 H) 3.82 (br. s., 1 H) 3.75 (br. s., 1 H) 3.53 (d, *J*=12.47 Hz, 2 H) 3.38 - 3.49 (m, 1 H) 3.36 (br. s., 1 H) 3.25 (br. s., 2 H) 3.12 (d, *J*=14.43 Hz, 1 H) 2.97 (d, *J*=14.43 Hz, 1 H) 2.90 (br. s., 1 H) 2.81 (br. s., 1 H) 2.40 - 2.50 (m, 2 H) 2.08 (br. s., 2 H) 1.75 - 1.93 (m, 4 H) 1.66 - 1.75 (m, 2 H) 1.63 (br. s., 2 H) 1.48 - 1.59 (m, 5 H) 1.44 (br. s., 2 H) 1.13 (br. s., 5 H) 0.94 (br. s., 6 H) 0.88 (br. s., 4 H) 0.83 (br. s., 14 H); ***m/z*** calcd C<sub>37</sub>H<sub>69</sub>N<sub>7</sub> [M+H]<sup>+</sup> 612.56, found (MS ESI) 612.55. **Purity** LCMS: 98.26% (TIC), 99% (214 nm, peak area); **RT** = 4.79 min

**27: (R)-1-((R)-1-cyclohexyl-3-((S)-2-(((R)-2-imino-5-isopropylimidazolidin-1-yl)methyl)pyrrolidin-1-yl)propan-2-yl)-4-isopropyl-3-(4-methylpentyl)imidazolidin-2-imine.** Using General Scheme (scheme 1) for the synthesis of bis-cyclic guanidines compound 2509-30 was synthesized using the following reagents: Boc-D-Valine-OH (R1), Boc-D-Cyclohexylalanine-OH (R2), Boc-D-Valine-OH (R3), 4-Methylvaleric acid (R4). The final crude product was purified using HPLC as described above, with a gradient of (B) 2, 0/2, 2/2, 6/20, 30/30. **<sup>1</sup>H NMR** (400 MHz, CHLOROFORM-*d*) δ ppm 8.59 (br. s., 2 H) 4.05 (br. s., 2 H) 3.84 (br. s., 1 H) 3.75 (br. s., 2 H) 3.32 - 3.60 (m, 4 H) 3.19 - 3.30 (m, 2 H) 3.12 (d, *J*=14.67 Hz,

1 H) 3.03 (br. s., 1 H) 2.77 - 2.97 (m, 2 H) 2.38 - 2.50 (m, 2 H) 2.13 (br. s., 1 H) 2.05 (br. s., 1 H) 1.80 (br. s., 4 H) 1.66 (d,  $J=17.85$  Hz, 4 H) 1.54 (br. s., 3 H) 1.45 (br. s., 2 H) 1.15 (br. s., 6 H) 0.94 (br. s., 4 H) 0.86 (br. s., 10 H) 0.80 (br. s., 5 H);  $m/z$  calcd  $C_{32}H_{61}N_7$   $[M+H]^+$  544.50, found (MS ESI) 544.5. **Purity** LCMS: 98.73% (TIC), 99% (214 nm, peak area); **RT** = 4.33 min

**28: (R)-1-((S)-3-(adamantan-1-ylmethyl)-2-imino-1-((R)-1-((S)-2-(((R)-2-imino-5-isopropylimidazolidin-1-yl)methyl)pyrrolidin-1-yl)-3-phenylpropan-2-yl)imidazolidin-4-yl)ethanol.** Using General Scheme (scheme 1) for the synthesis of bis-cyclic guanidines compound 2509-31 was synthesized using the following reagents: Boc-D-Valine-OH (R1), Boc-D-Phenylalanine-OH (R2), Boc-D-Threonine(Bzl)-OH (R3), 1-Adamantanecarboxylic acid (R4). The final crude product was purified using HPLC as described above, with a gradient of (B) 2, 0/2, 2/2, 6/20, 30/30. **1H NMR** (400 MHz, CHLOROFORM-*d*)  $\delta$  ppm 8.96 (br. s., 1 H) 8.63 (br. s., 2 H) 8.32 (br. s., 1 H) 7.39 (br. s., 2 H) 7.29 (br. s., 1 H) 7.21 (br. s., 1 H) 4.79 (br. s., 1 H) 4.02 (br. s., 2 H) 3.81 (br. s., 3 H) 3.46 - 3.66 (m, 3 H) 3.29 - 3.46 (m, 2 H) 3.22 (d,  $J=12.72$  Hz, 1 H) 3.13 (br. s., 1 H) 3.05 (d,  $J=13.20$  Hz, 1 H) 2.95 (br. s., 1 H) 2.81 (br. s., 1 H) 2.73 (br. s., 2 H) 2.52 (d,  $J=10.64$  Hz, 1 H) 2.38 (br. s., 1 H) 2.10 (br. s., 1 H) 1.88 (br. s., 3 H) 1.59 - 1.76 (m, 4 H) 1.55 (br. s., 4 H) 1.32 (br. s., 3 H) 1.06 - 1.23 (m, 5 H) 1.01 (br. s., 1 H) 0.94 (br. s., 2 H) 0.88 (br. s., 3 H);  $m/z$  calcd  $C_{36}H_{57}N_7O$   $[M+H]^+$  604.46, found (MS ESI) 614.45. **Purity** LCMS: 97.03% (TIC), 99% (214 nm, peak area); **RT** = 3.92 min

**29: (R)-1-((S)-3-((4-(tert-butyl)cyclohexyl)methyl)-2-imino-1-((R)-1-((S)-2-(((R)-2-imino-5-isopropylimidazolidin-1-yl)methyl)pyrrolidin-1-yl)-3-phenylpropan-2-yl)imidazolidin-4-yl)ethanol.** Using General Scheme (scheme 1) for the synthesis of bis-cyclic guanidines compound 2509-32 was synthesized using the following reagents: Boc-D-Valine-OH (R1), Boc-D-Phenylalanine-OH (R2), Boc-D-Threonine(Bzl)-OH (R3), 4-tert-butyl-cyclohexanecarboxylic acid (R4). The final crude product was purified using HPLC as described above, with a gradient of (B) 2, 0/2, 2/2, 6/20, 30/30. **1H NMR** (400 MHz, CHLOROFORM-*d*)  $\delta$  ppm 10.00 (br. s., 1 H) 8.59 (br. s., 2 H) 7.31 (br. s., 2 H) 7.21 (br. s., 2 H) 4.68 (br. s., 1 H) 4.20 (br. s., 2 H) 3.92 (br. s., 1 H) 3.81 (br. s., 1 H) 3.66 (br. s., 1 H) 3.44 - 3.62 (m, 4 H) 3.40 (br. s., 1 H) 3.20 (d,  $J=13.33$  Hz, 1 H) 3.12 (br. s., 1 H) 2.87 - 3.07 (m, 2 H) 2.62 - 2.83 (m, 2 H) 2.50 (d,  $J=11.37$  Hz, 1 H) 2.40 (br. s., 1 H) 2.09 (br. s., 1 H) 1.86 (br. s., 1 H) 1.70 (br. s., 2 H) 1.51 (br. s., 2 H) 1.36 (br. s., 2 H) 1.07 - 1.27 (m, 4 H) 1.00 (br. s., 1 H) 0.92 (br. s., 3 H) 0.77 - 0.89 (m, 13 H) 0.66 (br. s., 1 H);  $m/z$  calcd  $C_{36}H_{61}N_7O$   $[M+H]^+$  608.49, found (MS ESI) 608.45. **Purity** LCMS: 98.13% (TIC), 99% (214 nm, peak area); **RT** = 4.18 min

**30: (R)-1-((S)-2-imino-1-((R)-1-((S)-2-(((R)-2-imino-5-isopropylimidazolidin-1-yl)methyl)pyrrolidin-1-yl)-3-phenylpropan-2-yl)-3-(4-methylpentyl)imidazolidin-4-yl)ethanol.** Using General Scheme (scheme 1) for the synthesis of bis-cyclic guanidines compound 2509-33 was synthesized using the following reagents: Boc-D-Valine-OH (R1), Boc-D-Phenylalanine-OH (R2), Boc-D-Threonine(Bzl)-OH (R3), 4-Methylvaleric acid (R4). The final crude product was purified using HPLC as described above, with a gradient of (B) 2, 0/2, 2/2, 6/15, 30/25, 35/30. **1H NMR** (400 MHz, CHLOROFORM-*d*)  $\delta$  ppm 9.90 (br. s., 1 H) 9.00 (br. s., 1 H) 8.59 (br. s., 2 H) 7.29 (br. s., 2 H) 7.21 (br. s., 2 H) 4.59 (br. s., 2 H) 4.27 (br. s., 2 H) 3.89 (br. s., 1 H) 3.79 (br. s., 1 H) 3.66 (br. s., 1 H) 3.54 (br. s., 1 H) 3.34 - 3.51 (m, 4 H) 3.21 (d,  $J=13.94$  Hz, 1 H) 3.13 (br. s., 1 H) 2.86 - 3.06 (m, 2 H) 2.77 (br. s., 2 H) 2.36 - 2.63 (m, 2 H) 2.07 (br. s., 1 H) 1.86 (br. s., 1 H) 1.72 (br. s., 2 H) 1.39 - 1.60 (m, 2 H) 1.30 (br. s., 1 H) 1.04 - 1.22 (m, 3 H) 0.97 (br. s., 2 H) 0.91 (br. s., 3 H) 0.84 (br. s., 7 H);  $m/z$  calcd  $C_{31}H_{53}N_7O$

[M+H]<sup>+</sup> 540.43, found (MS ESI) 540.4. **Purity** LCMS: 96.78% (TIC), 99% (214 nm, peak area); **RT** = 3.63 min

**31: (R)-3-(adamantan-1-ylmethyl)-1-((R)-1-((S)-2-(((R)-2-imino-5-isopropylimidazolidin-1-yl)methyl)pyrrolidin-1-yl)-3-phenylpropan-2-yl)-4-propylimidazolidin-2-imine.** Using General Scheme (scheme 1) for the synthesis of bis-cyclic guanidines compound 2509-34 was synthesized using the following reagents: Boc-D-Valine-OH (R1), Boc-D-Phenylalanine-OH (R2), Boc-D-Norvaline-OH (R3), 1-Adamantanecarboxylic acid (R4). The final crude product was purified using HPLC as described above, with a gradient of (B) 2, 0/2, 2/2, 6/20, 30/30. **<sup>1</sup>H NMR** (400 MHz, CHLOROFORM-*d*) δ ppm 10.47 (br. s., 1 H) 9.33 (br. s., 1 H) 8.63 (br. s., 2 H) 7.37 (br. s., 2 H) 7.18 (br. s., 2 H) 4.68 (br. s., 1 H) 4.01 (br. s., 2 H) 3.76 (br. s., 1 H) 3.68 (br. s., 1 H) 3.58 (br. s., 2 H) 3.30 - 3.48 (m, 2 H) 3.16 - 3.30 (m, 3 H) 3.07 (d, *J*=14.06 Hz, 1 H) 2.98 (br. s., 2 H) 2.74 (t, *J*=11.55 Hz, 1 H) 2.45 - 2.67 (m, 3 H) 2.08 (br. s., 1 H) 1.87 (br. s., 4 H) 1.71 - 1.82 (m, 2 H) 1.63 (d, *J*=11.49 Hz, 4 H) 1.53 (br. s., 3 H) 1.27 - 1.41 (m, 3 H) 1.24 (br. s., 1 H) 1.05 - 1.21 (m, 3 H) 0.90 (br. s., 5 H) 0.82 (br. s., 3 H); **m/z** calcd C<sub>37</sub>H<sub>59</sub>N<sub>7</sub> [M+H]<sup>+</sup> 602.48, found (MS ESI) 602.45. **Purity** LCMS: 96.95% (TIC), 99% (214 nm, peak area); **RT** = 4.36 min

**32: (R)-3-((4-(tert-butyl)cyclohexyl)methyl)-1-((R)-1-((S)-2-(((R)-2-imino-5-isopropylimidazolidin-1-yl)methyl)pyrrolidin-1-yl)-3-phenylpropan-2-yl)-4-propylimidazolidin-2-imine.** Using General Scheme (scheme 1) for the synthesis of bis-cyclic guanidines compound 2509-35 was synthesized using the following reagents: Boc-D-Valine-OH (R1), Boc-D-Phenylalanine-OH (R2), Boc-D-Norvaline-OH (R3), 4-tert-butylcyclohexanecarboxylic acid (R4). The final crude product was purified using HPLC as described above, with a gradient of (B) 2, 0/2, 2/2, 6/20, 30/28. **<sup>1</sup>H NMR** (400 MHz, CHLOROFORM-*d*) δ ppm 8.64 (br. s., 2 H) 7.33 (br. s., 2 H) 7.20 (br. s., 2 H) 4.65 (br. s., 1 H) 3.75 (br. s., 2 H) 3.57 (br. s., 4 H) 3.30 - 3.49 (m, 3 H) 3.17 - 3.30 (m, 2 H) 3.12 (br. s., 1 H) 3.04 (d, *J*=14.06 Hz, 1 H) 2.96 (br. s., 1 H) 2.88 (d, *J*=15.53 Hz, 1 H) 2.69 - 2.82 (m, 1 H) 2.61 (d, *J*=10.39 Hz, 2 H) 2.09 (br. s., 1 H) 1.90 (br. s., 1 H) 1.79 (br. s., 2 H) 1.65 (br. s., 1 H) 1.43 - 1.59 (m, 2 H) 1.36 (d, *J*=12.10 Hz, 3 H) 1.23 (br. s., 3 H) 1.07 (d, *J*=12.72 Hz, 2 H) 0.86 - 1.00 (m, 8 H) 0.82 (br. s., 11 H); **m/z** calcd C<sub>37</sub>H<sub>63</sub>N<sub>7</sub> [M+H]<sup>+</sup> 606.51, found (MS ESI) 606.5. **Purity** LCMS: 97.57% (TIC), 99% (214 nm, peak area); **RT** = 4.57 min

**33: (R)-1-((R)-1-((S)-2-(((R)-2-imino-5-isopropylimidazolidin-1-yl)methyl)pyrrolidin-1-yl)-3-phenylpropan-2-yl)-3-(4-methylpentyl)-4-propylimidazolidin-2-imine.** Using General Scheme (scheme 1) for the synthesis of bis-cyclic guanidines compound 2509-36 was synthesized using the following reagents: Boc-D-Valine-OH (R1), Boc-D-Phenylalanine-OH (R2), Boc-D-Norvaline-OH (R3), 4-Methylvaleric acid (R4). The final crude product was purified using HPLC as described above, with a gradient of (B) 2, 0/2, 2/2, 6/20, 30/30. **<sup>1</sup>H NMR** (400 MHz, CHLOROFORM-*d*) δ ppm 8.60 (br. s., 2 H) 7.29 - 7.33 (m, 2 H) 7.23 - 7.27 (m, 2 H) 7.19 (br. s., 1 H) 4.55 (br. s., 1 H) 3.74 (br. s., 1 H) 3.32 - 3.60 (m, 6 H) 3.21 (br. s., 2 H) 2.90 - 3.10 (m, 4 H) 2.80 (d, *J*=10.27 Hz, 2 H) 2.47 - 2.68 (m, 2 H) 2.07 (br. s., 1 H) 1.81 - 1.93 (m, 1 H) 1.76 (br. s., 2 H) 1.64 (br. s., 1 H) 1.53 (br. s., 1 H) 1.39 - 1.49 (m, 1 H) 1.20 (br. s., 5 H) 0.96 (br. s., 2 H) 0.88 (br. s., 6 H) 0.81 (br. s., 10 H); **m/z** calcd C<sub>32</sub>H<sub>55</sub>N<sub>7</sub> [M+H]<sup>+</sup> 538.45, found (MS ESI) 538.4. **Purity** LCMS: 96.73% (TIC), 99% (214 nm, peak area); **RT** = 4.11 min

**34: (R)-3-(adamantan-1-ylmethyl)-1-((R)-1-((S)-2-(((R)-2-imino-5-isopropylimidazolidin-1-yl)methyl)pyrrolidin-1-yl)-3-phenylpropan-2-yl)-4-isopropylimidazolidin-2-imine.** Using General Scheme (scheme 1) for the synthesis of bis-cyclic guanidines compound 2509-37 was synthesized using the following reagents: Boc-D-Valine-OH (R1), Boc-D-Phenylalanine-OH (R2), Boc-D-Valine-OH (R3), 1-Adamantanecarboxylic acid (R4). The final crude product was purified using HPLC as described above, with a gradient of (B) 2, 0/2, 2/2, 6/20, 30/30. **<sup>1</sup>H NMR** (400 MHz, CHLOROFORM-*d*) δ ppm 10.45 (br. s., 1 H) 9.29 (br. s., 1 H) 8.65 (br. s., 2 H) 7.36 (br. s., 2 H) 7.29 - 7.33 (m, 2 H) 7.21 (br. s., 1 H) 4.63 (br. s., 1 H) 4.03 (br. s., 2 H) 3.75 (br. s., 2 H) 3.56 (br. s., 1 H) 3.46 (br. s., 1 H) 3.37 (t, *J*=14.12 Hz, 3 H) 3.27 (br. s., 1 H) 3.06 - 3.24 (m, 2 H) 2.90 - 3.03 (m, 2 H) 2.72 - 2.89 (m, 1 H) 2.62 (d, *J*=15.53 Hz, 1 H) 2.55 (br. s., 1 H) 2.16 (br. s., 1 H) 2.07 (br. s., 1 H) 1.89 (br. s., 3 H) 1.78 (br. s., 2 H) 1.60 - 1.71 (m, 3 H) 1.56 (br. s., 3 H) 1.37 (d, *J*=10.88 Hz, 3 H) 1.22 (d, *J*=11.25 Hz, 3 H) 0.86 - 0.99 (m, 5 H) 0.82 (br. s., 3 H) 0.73 (br. s., 3 H); ***m/z*** calcd C<sub>37</sub>H<sub>59</sub>N<sub>7</sub> [M+H]<sup>+</sup> 602.48, found (MS ESI) 602.45. **Purity** LCMS: 95.20% (TIC), 99% (214 nm, peak area); **RT** = 4.36 min

**35: (R)-3-((4-(tert-butyl)cyclohexyl)methyl)-1-((R)-1-((S)-2-(((R)-2-imino-5-isopropylimidazolidin-1-yl)methyl)pyrrolidin-1-yl)-3-phenylpropan-2-yl)-4-isopropylimidazolidin-2-imine.** Using General Scheme (scheme 1) for the synthesis of bis-cyclic guanidines compound 2509-38 was synthesized using the following reagents: Boc-D-Valine-OH (R1), Boc-D-Phenylalanine-OH (R2), Boc-D-Valine-OH (R3), 4-tert-butylcyclohexanecarboxylic acid (R4). The final crude product was purified using HPLC as described above, with a gradient of (B) 2, 0/2, 2/2, 6/20, 30/30. **<sup>1</sup>H NMR** (400 MHz, CHLOROFORM-*d*) δ ppm 8.65 (br. s., 2 H) 7.36 (br. s., 2 H) 7.29 (br. s., 2 H) 7.22 (br. s., 1 H) 4.65 (br. s., 1 H) 3.65 - 3.90 (m, 2 H) 3.58 (br. s., 2 H) 3.35 - 3.52 (m, 4 H) 3.23 - 3.33 (m, 2 H) 3.20 (br. s., 1 H) 3.09 (d, *J*=12.84 Hz, 1 H) 3.01 (br. s., 2 H) 2.71 - 2.92 (m, 2 H) 2.45 - 2.69 (m, 2 H) 2.09 (br. s., 1 H) 2.04 (br. s., 1 H) 1.92 (br. s., 1 H) 1.80 (br. s., 2 H) 1.62 - 1.74 (m, 1 H) 1.57 (br. s., 1 H) 1.39 - 1.53 (m, 2 H) 1.29 - 1.39 (m, 1 H) 1.23 (d, *J*=11.74 Hz, 1 H) 1.06 - 1.18 (m, 1 H) 0.99 (br. s., 2 H) 0.91 (br. s., 7 H) 0.84 (br. s., 10 H) 0.77 (br. s., 3 H); ***m/z*** calcd C<sub>37</sub>H<sub>63</sub>N<sub>7</sub> [M+H]<sup>+</sup> 606.51, found (MS ESI) 606.5. **Purity** LCMS: 97.88% (TIC), 99% (214 nm, peak area); **RT** = 4.58 min

**36: (R)-1-((R)-1-((S)-2-(((R)-2-imino-5-isopropylimidazolidin-1-yl)methyl)pyrrolidin-1-yl)-3-phenylpropan-2-yl)-4-isopropyl-3-(4-methylpentyl)imidazolidin-2-imine.** Using General Scheme (scheme 1) for the synthesis of bis-cyclic guanidines compound 2509-39 was synthesized using the following reagents: Boc-D-Valine-OH (R1), Boc-D-Phenylalanine-OH (R2), Boc-D-Valine-OH (R3), 4-Methylvaleric acid (R4). The final crude product was purified using HPLC as described above, with a gradient of (B) 2, 0/2, 2/2, 6/20, 30/28. **<sup>1</sup>H NMR** (400 MHz, CHLOROFORM-*d*) δ ppm 9.10 (br. s., 1 H) 8.38 (br. s., 2 H) 7.00 - 7.09 (m, 4 H) 6.95 (br. s., 1 H) 4.28 (br. s., 1 H) 3.50 (br. s., 1 H) 3.22 - 3.37 (m, 3 H) 3.13 (d, *J*=11.00 Hz, 3 H) 2.96 (br. s., 3 H) 2.74 (d, *J*=14.79 Hz, 3 H) 2.59 (d, *J*=10.27 Hz, 2 H) 2.34 (d, *J*=12.96 Hz, 1 H) 2.17 - 2.29 (m, 1 H) 1.83 (br. s., 1 H) 1.59 - 1.79 (m, 2 H) 1.52 (br. s., 2 H) 1.30 (br. s., 1 H) 1.16 - 1.26 (m, 1 H) 1.02 (br. s., 1 H) 0.92 (br. s., 1 H) 0.75 (br. s., 2 H) 0.63 (br. s., 5 H) 0.57 (br. s., 8 H) 0.47 (br. s., 4 H); ***m/z*** calcd C<sub>32</sub>H<sub>55</sub>N<sub>7</sub> [M+H]<sup>+</sup> 538.45, found (MS ESI) 538.4. **Purity** LCMS: 96.55% (TIC), 99% (214 nm, peak area); **RT** = 4.11 min

**37: 4-((1-((R)-1-((S)-2-(((R)-5-((S)-sec-butyl)-2-iminoimidazolidin-1-yl)methyl)pyrrolidin-1-yl)-3-phenylpropan-2-yl)-3-((4-(tert-butyl)cyclohexyl)methyl)-2-**

**iminoimidazolidin-4-yl)methyl)phenol.** Using General Scheme (scheme 1) for the synthesis of bis-cyclic guanidines compound 2509-40 was synthesized using the following reagents: Boc-D-Isoleucine-OH (R1), Boc-D-Phenylalanine-OH (R2), Boc-D-Tyrosine(2-Br-Z)-OH (R3), 4-tert-butyl-cyclohexanecarboxylic acid (R4). The final crude product was purified using HPLC as described above, with a gradient of (B) 2, 0/2, 2/2, 6/20, 30/28. **<sup>1</sup>H NMR** (400 MHz, CHLOROFORM-*d*) δ ppm 9.26 (br. s., 1 H) 8.66 (br. s., 2 H) 7.22 (br. s., 2 H) 6.88 (br. s., 3 H) 4.38 (br. s., 1 H) 3.94 (br. s., 2 H) 3.85 (br. s., 2 H) 3.64 (br. s., 2 H) 3.48 - 3.58 (m, 2 H) 3.45 (br. s., 1 H) 3.38 (br. s., 1 H) 3.23 (br. s., 1 H) 2.98 - 3.18 (m, 3 H) 2.92 (br. s., 1 H) 2.69 (br. s., 2 H) 2.53 (br. s., 2 H) 2.44 (br. s., 1 H) 1.95 (br. s., 1 H) 1.82 (br. s., 3 H) 1.52 (br. s., 2 H) 1.39 (br. s., 1 H) 1.33 (br. s., 1 H) 1.22 (d, *J*=13.45 Hz, 3 H) 0.95 (br. s., 4 H) 0.69 - 0.90 (m, 10 H); **m/z** calcd C<sub>42</sub>H<sub>65</sub>N<sub>7</sub>O [M+H]<sup>+</sup> 684.54, found (MS ESI) 684.5. **Purity** LCMS: 98.23 % (TIC), 99% (214 nm, peak area); **RT** = 4.47 min

### Penta-amine Compound Characterization

**2494-1:** (3S)-4-((R)-2-(((2R,3S)-1-amino-3-methylpentan-2-yl)amino)methyl)pyrrolidin-1-yl)-3-(((S)-2-((4-ethoxyphenethyl)amino)-3-phenylpropyl)amino)butan-2-ol. Using General Scheme (scheme 1) for the synthesis of penta-amines compound 2494-1 was synthesized using the following reagents: (R1) Boc-D-Ile-OH, (R2) Boc-D-Thr(Bzl)-OH, (R3) Boc-Phe-OH, (R4) 4-ethoxyphenylacetic acid. The final crude product was purified using HPLC as described above, with a gradient of (B) 2, 0/2, 2/2, 6/10, 35/40. **1H NMR** (400 MHz, CHLOROFORM-*d*)  $\delta$  ppm 8.52 (br. s., 1 H) 7.29 (br. s., 1 H) 7.26 (br. s., 1 H) 7.14 (d,  $J=8.93$  Hz, 3 H) 6.98 (br. s., 1 H) 6.73 - 6.89 (m, 3 H) 6.64 (br. s., 3 H) 4.01 (br. s., 2 H) 3.92 (br. s., 2 H) 3.61 (br. s., 1 H) 3.49 (br. s., 1 H) 3.32 (br. s., 1 H) 3.18 (br. s., 2 H) 2.97 - 3.14 (m, 5 H) 2.85 (br. s., 4 H) 2.19 (br. s., 1 H) 2.08 (br. s., 1 H) 2.02 (br. s., 2 H) 1.89 (br. s., 1 H) 1.76 (br. s., 1 H) 1.42 (br. s., 3 H) 1.31 (br. s., 1 H) 1.02 - 1.25 (m, 3 H) 0.92 (br. s., 3 H) 0.83 (br. s., 2 H) **m/z** calcd C<sub>34</sub>H<sub>57</sub>N<sub>5</sub>O<sub>2</sub> [M+H]<sup>+</sup> 567.45, found (MS ESI) 568.20. **Purity** LCMS: 97.51% (TIC), 100% (214 nm, peak area); **RT** = 3.2 min

**2494-2:** (2R,3S)-4-((R)-2-(((2R,3S)-1-amino-3-methylpentan-2-yl)amino)methyl)pyrrolidin-1-yl)-3-(((S)-2-((4-(tert-butyl)cyclohexyl)methyl)amino)-3-phenylpropyl)amino)butan-2-ol. Using General Scheme (scheme 1) for the synthesis of penta-amines compound 2494-2 was synthesized using the following reagents: (R1) Boc-D-Ile-OH, (R2) Boc-D-Thr(Bzl)-OH, (R3) Boc-Phe-OH, 4-tert-butyl-cyclohexanecarboxylic acid (R4) 4-tert-butyl-cyclohexanecarboxylic acid. The final crude product was purified using HPLC as described above, with a gradient of (B) 2, 0/2, 2/2, 6/15, 35/45. **1H NMR** (400 MHz, CHLOROFORM-*d*)  $\delta$  ppm 8.51 (br. s., 1 H) 7.33 (br. s., 2 H) 7.26 (br. s., 3 H) 6.81 (br. s., 5 H) 3.74 - 4.02 (m, 2 H) 3.60 (br. s., 1 H) 3.47 (br. s., 1 H) 3.07 - 3.32 (m, 3 H) 3.02 (br. s., 3 H) 2.94 (br. s., 2 H) 2.80 (d,  $J=15.77$  Hz, 3 H) 2.31 (br. s., 1 H) 2.18 (br. s., 1 H) 2.03 (br. s., 4 H) 1.97 (br. s., 1 H) 1.85 - 1.94 (m, 1 H) 1.65 - 1.85 (m, 3 H) 1.42 - 1.64 (m, 3 H) 1.32 (br. s., 1 H) 1.17 (br. s., 1 H) 1.02 - 1.14 (m, 2 H) 0.95 (br. s., 5 H) 0.84 (br. s., 9 H) **m/z** calcd C<sub>35</sub>H<sub>65</sub>N<sub>5</sub>O [M+H]<sup>+</sup> 571.52, found (MS ESI) 572.20. **Purity** LCMS: 98.89% (TIC), 93.02% (214 nm, peak area); **RT** = 3.6 min

**2494-3:** (3S)-4-((R)-2-(((2R,3S)-1-amino-3-methylpentan-2-yl)amino)methyl)pyrrolidin-1-yl)-3-(((S)-2-((3,5-bis(trifluoromethyl)phenethyl)amino)-3-phenylpropyl)amino)butan-2-ol. Using General Scheme (scheme 1) for the synthesis of penta-amines compound 2494-3 was synthesized using the following reagents: (R1) Boc-D-Ile-OH, (R2) Boc-D-Thr(Bzl)-OH, (R3) Boc-Phe-OH, (R4) 3,5-Bis(Trifluoromethyl)-Phenylacetic acid. The final crude product was purified using HPLC as described above, with a gradient of (B) 2, 0/2, 2/2, 6/15, 35/45. **1H NMR** (400 MHz, CHLOROFORM-*d*)  $\delta$  ppm 8.48 (br. s., 1 H) 7.75 (br. s., 1 H) 7.66 (br. s., 1 H) 7.31 (br. s., 2 H) 7.24 (br. s., 2 H) 7.18 (br. s., 1 H) 6.62 (br. s., 4 H) 3.98 (br. s., 1 H) 3.89 (br. s., 1 H) 3.54 (br. s., 1 H) 3.35 (br. s., 1 H) 3.15 - 3.30 (m, 3 H) 2.99 - 3.15 (m, 4 H) 2.87 - 2.99 (m, 3 H) 2.81 (br. s., 1 H) 2.68 (br. s., 1 H) 2.22 (br. s., 1 H) 2.10 (br. s., 1 H) 2.02 (br. s., 2 H) 1.90 (br. s., 1 H) 1.78 (br. s., 1 H) 1.51 (br. s., 1 H) 1.31 (br. s., 1 H) 1.18 (br. s., 1 H) 1.12 (br. s., 2 H) 0.93 (br. s., 3 H) 0.83 (br. s., 3 H) **m/z** calcd C<sub>34</sub>H<sub>51</sub>F<sub>6</sub>N<sub>5</sub>O [M+H]<sup>+</sup> 659.4, found (MS ESI) 660.00. **Purity** LCMS: 92.73% (TIC), 91.69% (214 nm, peak area); **RT** = 3.62 min

**2494-4:** (3S)-4-((R)-2-(((2R,3S)-1-amino-3-methylpentan-2-yl)amino)methyl)pyrrolidin-1-yl)-3-((R)-3-cyclohexyl-2-((4-ethoxyphenethyl)amino)propyl)amino)butan-2-ol. Using General Scheme (scheme 1) for the synthesis of penta-amines compound 2494-4 was synthesized using the following reagents: (R1) Boc-D-Ile-OH, (R2) Boc-D-Thr(Bzl)-OH, (R3) Boc-D-Cha-OH, (R4) 4-ethoxyphenylacetic acid. The final crude product was purified using HPLC as described above, with a gradient of (B) 2, 0/2, 2/2, 6/10, 35/40. **1H NMR** (400 MHz, CHLOROFORM-*d*)  $\delta$  ppm 8.51 (br. s., 2 H) 7.29 (br. s., 1 H) 7.01 - 7.26 (m, 2 H) 6.74 - 7.00 (m, 3 H) 6.65 (br. s., 3 H) 4.01 (br. s., 4 H) 3.65 (br. s., 1 H) 3.28 (br. s., 1 H) 3.18 (br. s., 3 H) 2.98 - 3.14 (m, 5 H) 2.94 (br. s., 1 H) 2.66 - 2.89 (m, 1 H) 2.21 (br. s., 1 H) 2.09 (br. s., 1 H) 2.03 (br. s., 2 H) 1.90 (br. s., 1 H) 1.63 - 1.79 (m, 5 H) 1.47 - 1.63 (m, 2 H) 1.41 (br. s., 3 H) 1.09 - 1.33 (m, 7 H) 0.88 - 1.05 (m, 4 H) 0.84 (br. s., 3 H) **m/z** calcd C<sub>34</sub>H<sub>63</sub>N<sub>5</sub>O<sub>2</sub> [M+H]<sup>+</sup> 573.5, found (MS ESI) 574.20. **Purity** LCMS: 100% (TIC), 100% (214 nm, peak area); **RT** = 3.40 min

**2494-5:** N/A

**2494-6:** (3S)-4-((R)-2-(((2R,3S)-1-amino-3-methylpentan-2-yl)amino)methyl)pyrrolidin-1-yl)-3-((R)-2-((3,5-bis(trifluoromethyl)phenethyl)amino)-3-cyclohexylpropyl)amino)butan-2-ol. Using General Scheme (scheme 1) for the synthesis of penta-amines compound 2494-6 was synthesized using the following reagents: (R1) Boc-D-Ile-OH, (R2) Boc-D-Thr(Bzl)-OH, (R3) Boc-D-Cha-OH, (R4) 3,5-Bis(Trifluoromethyl)-Phenylacetic acid. The final crude product was purified using HPLC as described above a gradient of (B) 2, 0/2, 2/2, 6/15, 35/45. **1H NMR** (400 MHz, CHLOROFORM, with *-d*)  $\delta$  ppm 8.54 (br. s., 1 H) 7.79 (d, *J*=9.54 Hz, 3 H) 6.77 (br. s., 3 H) 4.06 (br. s., 1 H) 3.97 (br. s., 1 H) 3.63 (br. s., 1 H) 3.51 (d, *J*=12.23 Hz, 1 H) 3.28 - 3.45 (m, 2 H) 3.21 (d, *J*=11.74 Hz, 4 H) 2.91 - 3.15 (m, 5 H) 2.77 - 2.89 (m, 1 H) 2.72 (d, *J*=9.66 Hz, 1 H) 2.23 (br. s., 1 H) 2.11 (br. s., 1 H) 2.03 (br. s., 3 H) 1.92 (br. s., 1 H) 1.78 (br. s., 1 H) 1.65 - 1.74 (m, 4 H) 1.60 (br. s., 1 H) 1.55 (br. s., 1 H) 1.27 (br. s., 5 H) 1.19 (br. s., 3 H) 0.95 (br. s., 4 H) 0.84 (br. s., 3 H) **m/z** calcd C<sub>34</sub>H<sub>57</sub>F<sub>6</sub>N<sub>5</sub>O [M+H]<sup>+</sup> 665.45, found (MS ESI) 666.25. **Purity** LCMS: 98.78% (TIC), 100% (214 nm, peak area); **RT** = 3.76 min

**2494-7:** 4-((2S)-3-(((2S)-1-((R)-2-(((2R,3S)-1-amino-3-methylpentan-2-yl)amino)methyl)pyrrolidin-1-yl)-3-hydroxybutan-2-yl)amino)-2-((4-ethoxyphenethyl)amino)propyl)phenol. Using General Scheme (scheme 1) for the synthesis of penta-amines compound 2494-7 was synthesized using the following reagents: (R1) Boc-D-Ile-OH, (R2) Boc-D-Thr(Bzl)-OH, (R3) Boc-D-Tyr(2-Br-Z)-OH, (R4) 4-ethoxyphenylacetic acid. The final crude product was purified using HPLC as described above, with a gradient of (B) 2, 0/2, 2/2, 6/10, 35/40. **1H NMR** (400 MHz, CHLOROFORM-*d*)  $\delta$  ppm 8.38 (br. s., 1 H) 7.14 (br. s., 1 H) 6.99 (br. s., 2 H) 6.82 (br. s., 3 H) 6.65 (br. s., 4 H) 3.84 (br. s., 2 H) 3.63 (br. s., 2 H) 3.44 (br. s., 1 H) 3.29 (br. s., 1 H) 3.11 (br. s., 2 H) 2.95 (br. s., 3 H) 2.83 (br. s., 4 H) 2.60 (br. s., 3 H) 2.00 (br. s., 1 H) 1.87 (br. s., 5 H) 1.71 (br. s., 1 H) 1.57 (br. s., 2 H) 1.24 (br. s., 3 H) 1.13 (br. s., 1 H) 0.96 (d, *J*=19.44 Hz, 1 H) 0.85 (br. s., 2 H) 0.74 (br. s., 3 H) 0.63 (br. s., 2 H) **m/z** calcd C<sub>34</sub>H<sub>57</sub>N<sub>5</sub>O<sub>3</sub> [M+H]<sup>+</sup> 583.45, found (MS ESI) 584.25. **Purity** LCMS: 100% (TIC), 100% (214 nm, peak area); **RT** = 2.96 min

**2494-8:** 4-((2S)-3-(((2S)-1-((R)-2-(((2R,3S)-1-amino-3-methylpentan-2-yl)amino)methyl)pyrrolidin-1-yl)-3-hydroxybutan-2-yl)amino)-2-(((4-(tert-butyl)cyclohexyl)methyl)amino)propyl)phenol. Using General Scheme (scheme 1) for the synthesis of penta-amines compound 2494-8 was synthesized using the following reagents: (R1) Boc-D-Ile-OH, (R2) Boc-D-Thr(Bzl)-OH, (R3) Boc-D-Tyr(2-Br-Z)-OH, (R4) 4-tert-butyl-cyclohexanecarboxylic acid. The final crude product was purified using HPLC as described above, with a gradient of (B) 2, 0/2, 2/2, 6/10, 35/40. **1H NMR** (400 MHz, CHLOROFORM-*d*)  $\delta$  ppm 8.52 (br. s., 1 H) 7.29 (br. s., 1 H) 7.02 (br. s., 3 H) 6.82 (br. s., 5 H) 3.78 (br. s., 2 H) 3.63 (br. s., 1 H) 3.31 (br. s., 2 H) 3.10 (br. s., 3 H) 2.96 (br. s., 4 H) 2.76 (br. s., 3 H) 2.33 (br. s., 1 H) 2.18 (br. s., 1 H) 2.03 (br. s., 5 H) 1.85 - 1.97 (m, 2 H) 1.82 (br. s., 1 H) 1.73 (br. s., 1 H) 1.58 (br. s., 3 H) 1.29 (br. s., 1 H) 1.16 (br. s., 2 H) 1.02 (br. s., 4 H) 0.93 (br. s., 3 H) 0.68 - 0.89 (m, 9 H) **m/z** calcd C<sub>35</sub>H<sub>65</sub>N<sub>5</sub>O<sub>2</sub> [M+H]<sup>+</sup> 587.51, found (MS ESI) 588.20. **Purity** LCMS: 99.12% (TIC), 100% (214 nm, peak area); **RT** = 3.95 min

**2494-9:** 4-((2S)-3-(((2S)-1-((R)-2-(((2R,3S)-1-amino-3-methylpentan-2-yl)amino)methyl)pyrrolidin-1-yl)-3-hydroxybutan-2-yl)amino)-2-((3,5-bis(trifluoromethyl)phenethyl)amino)propyl)phenol. Using General Scheme (scheme 1) for the synthesis of penta-amines compound 2494-9 was synthesized using the following reagents: (R1) Boc-D-Ile-OH, (R2) Boc-D-Thr(Bzl)-OH, (R3) Boc-D-Tyr(2-Br-Z)-OH, (R4) 3,5-Bis(Trifluoromethyl)-Phenylacetic acid. The final crude product was purified using HPLC as described above, with a gradient of (B) 2, 0/2, 2/2, 6/10, 35/40. **1H NMR** (400 MHz, CHLOROFORM-*d*)  $\delta$  ppm 8.52 (br. s., 1 H) 7.77 (br. s., 2 H) 7.00 (br. s., 2 H) 6.84 - 6.96 (m, 2 H) 6.78 (br. s., 5 H) 3.79 (br. s., 2 H) 3.60 (br. s., 1 H) 3.26 - 3.50 (m, 3 H) 3.21 (br. s., 2 H) 2.95 - 3.14 (m, 4 H) 2.92 (br. s., 2 H) 2.57 - 2.85 (m, 2 H) 2.18 (br. s., 1 H) 2.02 (br. s., 5 H) 1.86 (br. s., 1 H) 1.75 (br. s., 2 H) 1.28 (br. s., 1 H) 1.13 (br. s., 1 H) 1.02 (br. s., 2 H) 0.92 (br. s., 2 H) 0.80 (br. s., 2 H) **m/z** calcd C<sub>34</sub>H<sub>51</sub>F<sub>6</sub>N<sub>5</sub>O<sub>2</sub> [M+H]<sup>+</sup> 675.39, found (MS ESI) 676.15. **Purity** LCMS: 96.45% (TIC), 98% (214 nm, peak area); **RT** = 4.30 min

**2494-10:** (2R,3S)-N2-(((R)-1-((S)-3-cyclohexyl-2-(((R)-2-((4-ethoxyphenethyl)amino)-3-phenylpropyl)amino)propyl)pyrrolidin-2-yl)methyl)-3-methylpentane-1,2-diamine. Using General Scheme (scheme 1) for the synthesis of penta-amines compound 2494-10 was synthesized using the following reagents: (R1) Boc-D-Ile-OH, (R2) Boc-Cha-OH, (R3) Boc-Phe-OH, (R4) 4-ethoxyphenylacetic acid. The final crude product was purified using HPLC as described above, with a gradient of (B) 2, 0/2, 2/2, 6/15, 35/45. **1H NMR** (400 MHz, CHLOROFORM-*d*)  $\delta$  ppm 8.53 (br. s., 1 H) 7.29 - 7.38 (m, 2 H) 7.20 - 7.27 (m, 2 H) 7.00 - 7.19 (m, 3 H) 6.83 (d, *J*=6.60 Hz, 5 H) 4.01 (br. s., 2 H) 3.87 (br. s., 1 H) 3.69 (br. s., 1 H) 3.47 (br. s., 1 H) 3.36 (br. s., 2 H) 3.09 - 3.29 (m, 5 H) 3.03 (d, *J*=13.08 Hz, 2 H) 2.70 - 2.98 (m, 6 H) 2.20 (br. s., 1 H) 2.10 (br. s., 1 H) 2.01 (br. s., 2 H) 1.77 (br. s., 2 H) 1.63 (br. s., 4 H) 1.50 (d, *J*=11.98 Hz, 2 H) 1.41 (br. s., 3 H) 1.33 (br. s., 1 H) 1.27 (br. s., 2 H) 1.13 (d, *J*=11.98 Hz, 4 H) 0.93 (br. s., 4 H) 0.84 (br. s., 3 H) 0.70 (d, *J*=10.39 Hz, 1 H) **m/z** calcd C<sub>39</sub>H<sub>65</sub>N<sub>5</sub>O [M+H]<sup>+</sup> 619.52, found 620.20 (MS ESI). **Purity** LCMS: 99.25% (TIC), 98.65% (214 nm, peak area); **RT** = 3.70 min

**2494-11:** (2R,3S)-N2-(((R)-1-((S)-2-(((R)-2-(((4-(tert-butyl)cyclohexyl)methyl)amino)-3-phenylpropyl)amino)-3-cyclohexylpropyl)pyrrolidin-2-yl)methyl)-3-methylpentane-1,2-diamine. Using General Scheme (scheme 1) for the synthesis of penta-amines compound 2494-11 was synthesized using the following reagents: (R1) Boc-D-Ile-OH, (R2) Boc-Cha-OH, (R3)



Boc-Phe-OH, (R4) 4-tert-butyl-cyclohexanecarboxylic acid. The final crude product was purified using HPLC as described above, with a gradient of (B) 2, 0/2, 2/2, 6/20, 35/50. **1H NMR** (400 MHz, CHLOROFORM-*d*)  $\delta$  ppm 8.52 (br. s., 1 H) 7.33 (br. s., 2 H) 6.57 (br. s., 5 H) 3.83 (br. s., 1 H) 3.67 (br. s., 1 H) 3.32 (br. s., 2 H) 3.21 (br. s., 1 H) 3.07 (d,  $J=10.51$  Hz, 2 H) 2.84 - 3.03 (m, 5 H) 2.60 - 2.83 (m, 2 H) 2.30 (br. s., 1 H) 2.18 (br. s., 1 H) 2.07 (br. s., 1 H) 1.88 - 2.04 (m, 4 H) 1.73 - 1.87 (m, 3 H) 1.46 - 1.73 (m, 8 H) 1.33 (br. s., 2 H) 1.27 (br. s., 2 H) 1.06 - 1.21 (m, 4 H) 0.89 - 1.04 (m, 7 H) 0.68 - 0.89 (m, 12 H) **m/z** calcd C<sub>40</sub>H<sub>73</sub>N<sub>5</sub> [M+H]<sup>+</sup> 623.59, found (MS ESI) 624.20. **Purity** LCMS: 100% (TIC), 100% (214 nm, peak area); **RT** = 3.98 min

**2494-12:** (2R,3S)-N2-(((R)-1-((S)-2-(((R)-2-((3,5-bis(trifluoromethyl)phenethyl)amino)-3-phenylpropyl)amino)-3-cyclohexylpropyl)pyrrolidin-2-yl)methyl)-3-methylpentane-1,2-diamine. Using General Scheme (scheme 1) for the synthesis of penta-amines compound 2494-12 was synthesized using the following reagents: (R1) Boc-D-Ile-OH, (R2) Boc-Cha-OH, (R3) Boc-Phe-OH, (R4) 3,5-Bis(Trifluoromethyl)-Phenylacetic acid. The final crude product was purified using HPLC as described above, with a gradient of (B) 2, 0/2, 2/2, 6/20, 35/50. **1H NMR** (400 MHz, CHLOROFORM-*d*)  $\delta$  ppm 8.50 (br. s., 1 H) 7.75 (br. s., 1 H) 7.68 (br. s., 2 H) 7.32 (br. s., 2 H) 7.20 (br. s., 3 H) 6.76 (br. s., 3 H) 3.80 (br. s., 1 H) 3.64 (br. s., 1 H) 3.35 (br. s., 3 H) 3.29 (br. s., 1 H) 2.97 - 3.25 (m, 7 H) 2.85 - 2.97 (m, 2 H) 2.77 (t,  $J=11.86$  Hz, 2 H) 2.23 (br. s., 1 H) 2.12 (br. s., 1 H) 2.01 (br. s., 2 H) 1.79 (br. s., 2 H) 1.64 (br. s., 3 H) 1.54 (d,  $J=13.20$  Hz, 2 H) 1.36 (br. s., 1 H) 1.31 (br. s., 1 H) 1.15 (d,  $J=12.10$  Hz, 4 H) 0.89 - 1.05 (m, 4 H) 0.85 (br. s., 3 H) 0.75 (br. s., 1 H) **m/z** calcd C<sub>39</sub>H<sub>59</sub>F<sub>6</sub>N<sub>5</sub> [M+H]<sup>+</sup> 711.47, found (MS ESI) 712.20. **Purity** LCMS: 100% (TIC), 100% (214 nm, peak area); **RT** = 3.99 min

**2494-13:** (2R,3S)-N2-(((R)-1-((S)-3-cyclohexyl-2-(((R)-3-cyclohexyl-2-((4-ethoxyphenethyl)amino)propyl)amino)propyl)pyrrolidin-2-yl)methyl)-3-methylpentane-1,2-diamine. Using General Scheme (scheme 1) for the synthesis of penta-amines compound 2494-13 was synthesized using the following reagents: (R1) Boc-D-Ile-OH, (R2) Boc-Cha-OH, (R3) Boc-D-Cha-OH, (R4) 4-ethoxyphenylacetic acid. The final crude product was purified using HPLC as described above, with a gradient of (B) 2, 0/2, 2/2, 6/20, 35/50. **1H NMR** (400 MHz, CHLOROFORM-*d*)  $\delta$  ppm 8.53 (br. s., 2 H) 7.29 (br. s., 1 H) 7.18 (d,  $J=7.21$  Hz, 3 H) 6.84 (d,  $J=6.85$  Hz, 4 H) 3.98 - 4.25 (m, 2 H) 3.96 (br. s., 1 H) 3.68 (br. s., 1 H) 3.33 - 3.49 (m, 2 H) 3.26 (d,  $J=12.84$  Hz, 2 H) 3.17 (br. s., 2 H) 2.93 - 3.13 (m, 4 H) 2.84 - 2.93 (m, 1 H) 2.57 - 2.83 (m, 2 H) 2.16 - 2.43 (m, 1 H) 2.12 (br. s., 1 H) 2.03 (br. s., 3 H) 1.63 - 1.87 (m, 10 H) 1.55 (br. s., 3 H) 1.41 (br. s., 3 H) 1.32 (br. s., 2 H) 1.09 - 1.29 (m, 7 H) 0.93 (br. s., 6 H) 0.69 - 0.89 (m, 3 H) **m/z** calcd C<sub>39</sub>H<sub>71</sub>N<sub>5</sub>O [M+H]<sup>+</sup> 625.57, found (MS ESI) 626.20. **Purity** LCMS: 99.16% (TIC), 100% (214 nm, peak area); **RT** = 3.87 min

**2494-14:** N/A

**2494-15:** (2R,3S)-N2-(((R)-1-((S)-2-(((R)-2-((3,5-bis(trifluoromethyl)phenethyl)amino)-3-cyclohexylpropyl)amino)-3-cyclohexylpropyl)pyrrolidin-2-yl)methyl)-3-methylpentane-1,2-diamine. Using General Scheme (scheme 1) for the synthesis of penta-amines compound 2494-15 was synthesized using the following reagents: (R1) Boc-D-Ile-OH, (R2) Boc-Cha-OH, (R3) Boc-D-Cha-OH, (R4) 3,5-Bis(Trifluoromethyl)-Phenylacetic acid. The final crude product was purified using HPLC as described above, with a gradient of (B) 2, 0/2, 2/2, 6/20, 35/50. **1H NMR** (400 MHz, CHLOROFORM-*d*)  $\delta$  ppm 8.51 (br. s., 2 H) 7.73 - 7.99 (m, 3 H) 6.63 (br. s., 3

H) 3.91 (br. s., 1 H) 3.75 (br. s., 1 H) 3.37 - 3.61 (m, 3 H) 3.11 - 3.36 (m, 5 H) 3.04 (d,  $J=14.31$  Hz, 2 H) 2.91 (d,  $J=10.64$  Hz, 1 H) 2.63 - 2.85 (m, 2 H) 2.26 (br. s., 1 H) 2.13 (br. s., 1 H) 2.03 (br. s., 3 H) 1.84 (br. s., 1 H) 1.65 - 1.77 (m, 9 H) 1.58 (br. s., 3 H) 1.34 (br. s., 3 H) 1.21 (br. s., 7 H) 0.89 - 1.07 (m, 6 H) 0.64 - 0.89 (m, 4 H) **m/z** calcd  $C_{39}H_{65}F_6N_5$   $[M+H]^+$  717.51, found (MS ESI) 718.10. **Purity** LCMS: 100% (TIC), 100% (214 nm, peak area); **RT** = 4.15 min

**2494-16:** **4-((R)-3-(((S)-1-((R)-2-(((2R,3S)-1-amino-3-methylpentan-2-yl)amino)methyl)pyrrolidin-1-yl)-3-cyclohexylpropan-2-yl)amino)-2-((4-ethoxyphenethyl)amino)propyl)phenol.** Using General Scheme (scheme 1) for the synthesis of penta-amines compound 2494-16 was synthesized using the following reagents: (R1) Boc-D-Ile-OH, (R2) Boc-Cha-OH, (R3) Boc-D-Tyr(2-Br-Z)-OH, (R4) 4-ethoxyphenylacetic acid. The final crude product was purified using HPLC as described above, with a gradient of (B) 2, 0/2, 2/2, 6/10, 35/40. **1H NMR** (400 MHz, CHLOROFORM-*d*)  $\delta$  ppm 8.57 (br. s., 2 H) 7.30 (br. s., 1 H) 7.14 (d,  $J=6.85$  Hz, 3 H) 6.90 - 7.02 (m, 2 H) 6.79 - 6.89 (m, 4 H) 6.08 (br. s., 2 H) 4.00 (br. s., 2 H) 3.77 (br. s., 1 H) 3.68 (br. s., 1 H) 3.30 (br. s., 2 H) 3.21 (br. s., 2 H) 3.07 (br. s., 4 H) 3.01 (br. s., 3 H) 2.89 (br. s., 1 H) 2.73 (d,  $J=9.78$  Hz, 2 H) 2.63 (br. s., 1 H) 2.19 (br. s., 1 H) 1.90 - 2.11 (m, 2 H) 1.75 (br. s., 2 H) 1.63 (br. s., 5 H) 1.40 (br. s., 5 H) 1.04 - 1.28 (m, 6 H) 0.90 (br. s., 4 H) 0.81 (br. s., 4 H) **m/z** calcd  $C_{39}H_{65}N_5O_2$   $[M+H]^+$  635.51, found (MS ESI) 636.25. **Purity** LCMS: 99.48% (TIC), 100% (214 nm, peak area); **RT** = 3.47 min

**2494-17:** **4-((R)-3-(((S)-1-((R)-2-(((2R,3S)-1-amino-3-methylpentan-2-yl)amino)methyl)pyrrolidin-1-yl)-3-cyclohexylpropan-2-yl)amino)-2-(((4-(tert-butyl)cyclohexyl)methyl)amino)propyl)phenol.** Using General Scheme (scheme 1) for the synthesis of penta-amines compound 2494-17 was synthesized using the following reagents: (R1) Boc-D-Ile-OH, (R2) Boc-Cha-OH, (R3) Boc-D-Tyr(2-Br-Z)-OH, (R4) 4-tert-butylcyclohexanecarboxylic acid. The final crude product was purified using HPLC as described above, with a gradient of (B) 2, 0/2, 2/2, 6/20, 35/50. **1H NMR** (400 MHz, CHLOROFORM-*d*)  $\delta$  ppm 8.52 (br. s., 1 H) 7.01 (br. s., 7 H) 6.90 (br. s., 1 H) 6.84 (br. s., 2 H) 3.80 (br. s., 1 H) 3.65 (br. s., 1 H) 3.36 (br. s., 2 H) 3.23 (d,  $J=11.49$  Hz, 1 H) 2.97 - 3.17 (m, 4 H) 2.85 - 2.96 (m, 2 H) 2.81 (br. s., 1 H) 2.73 (d,  $J=11.74$  Hz, 2 H) 2.28 (br. s., 1 H) 2.19 (br. s., 1 H) 1.83 - 2.09 (m, 8 H) 1.78 (br. s., 2 H) 1.48 - 1.72 (m, 7 H) 1.35 (br. s., 2 H) 1.15 (br. s., 5 H) 0.89 - 1.05 (m, 6 H) 0.84 (br. s., 10 H) **m/z** calcd  $C_{40}H_{73}N_5O$   $[M+H]^+$  639.58, found (MS ESI) 640.25. **Purity** LCMS: 99.31% (TIC), 100% (214 nm, peak area); **RT** = 3.81 min

**2494-18:** **4-((R)-3-(((S)-1-((R)-2-(((2R,3S)-1-amino-3-methylpentan-2-yl)amino)methyl)pyrrolidin-1-yl)-3-cyclohexylpropan-2-yl)amino)-2-((3,5-bis(trifluoromethyl)phenethyl)amino)propyl)phenol.** Using General Scheme (scheme 1) for the synthesis of penta-amines compound 2494-18 was synthesized using the following reagents: (R1) Boc-D-Ile-OH, (R2) Boc-Cha-OH, (R3) Boc-D-Tyr(2-Br-Z)-OH, (R4) 3,5-Bis(Trifluoromethyl)-Phenylacetic acid. The final crude product was purified using HPLC as described above, with a gradient of (B) 2, 0/2, 2/2, 6/20, 35/50. **1H NMR** (400 MHz, CHLOROFORM-*d*)  $\delta$  ppm 8.53 (br. s., 1 H) 7.73 (br. s., 2 H) 7.29 (br. s., 1 H) 6.83 - 7.12 (m, 6 H) 6.57 - 6.83 (m, 3 H) 3.78 (br. s., 1 H) 3.46 (br. s., 1 H) 3.22 - 3.39 (m, 3 H) 3.10 (d,  $J=13.82$  Hz, 3 H) 3.03 (br. s., 2 H) 2.65 - 2.92 (m, 4 H) 2.21 (d,  $J=16.99$  Hz, 1 H) 2.09 (br. s., 1 H) 2.02 (br. s., 6 H) 1.86 (br. s., 1 H) 1.54 - 1.82 (m, 5 H) 1.34 (d,  $J=18.46$  Hz, 2 H) 1.14 (d,  $J=11.86$  Hz,

4 H) 0.92 (br. s., 3 H) 0.83 (br. s., 3 H) **m/z** calcd C<sub>39</sub>H<sub>59</sub>F<sub>6</sub>N<sub>5</sub>O [M+H]<sup>+</sup> 727.46, found (MS ESI) 728.20. **Purity** LCMS: 100% (TIC), 100% (214 nm, peak area); **RT** = 3.79 min

**2494-19:** (2R,3S)-N2-(((R)-1-((R)-2-(((S)-2-((4-ethoxyphenethyl)amino)-3-phenylpropyl)amino)-3-phenylpropyl)pyrrolidin-2-yl)methyl)-3-methylpentane-1,2-diamine. Using General Scheme (scheme 1) for the synthesis of penta-amines compound 2494-19 was synthesized using the following reagents: (R1) Boc-D-Ile-OH, (R2) Boc-D-Phe-OH, (R3) Boc-Phe-OH, (R4) 4-ethoxyphenylacetic acid. The final crude product was purified using HPLC as described above, with a gradient of (B) 2, 0/2, 2/2, 6/20, 35/50. **1H NMR** (400 MHz, CHLOROFORM-*d*)  $\delta$  ppm 8.51 (br. s., 2 H) 7.35 (d, *J*=6.24 Hz, 3 H) 7.19 - 7.27 (m, 3 H) 7.15 (d, *J*=7.95 Hz, 3 H) 6.93 - 7.11 (m, 4 H) 6.83 (d, *J*=6.97 Hz, 4 H) 3.98 - 4.15 (m, 2 H) 3.90 - 3.98 (m, 1 H) 3.51 (br. s., 1 H) 3.40 (d, *J*=13.69 Hz, 1 H) 3.26 (br. s., 2 H) 2.96 - 3.23 (m, 7 H) 2.79 - 2.95 (m, 3 H) 2.60 - 2.78 (m, 2 H) 2.55 (d, *J*=11.74 Hz, 1 H) 2.38 (t, *J*=10.82 Hz, 1 H) 2.19 (br. s., 1 H) 2.03 (br. s., 2 H) 1.94 (br. s., 1 H) 1.74 (br. s., 2 H) 1.42 (br. s., 3 H) 1.35 (br. s., 1 H) 1.19 (br. s., 1 H) 0.94 (br. s., 3 H) 0.69 - 0.90 (m, 2 H) **m/z** calcd C<sub>39</sub>H<sub>59</sub>N<sub>5</sub>O [M+H]<sup>+</sup> 613.47, found (MS ESI) 614.15. **Purity** LCMS: 100% (TIC), 100% (214 nm, peak area); **RT** = 3.55 min

**2494-20:** (2R,3S)-N2-(((R)-1-((R)-2-(((S)-2-(((4-(tert-butyl)cyclohexyl)methyl)amino)-3-phenylpropyl)amino)-3-phenylpropyl)pyrrolidin-2-yl)methyl)-3-methylpentane-1,2-diamine. Using General Scheme (scheme 1) for the synthesis of penta-amines compound 2494-20 was synthesized using the following reagents: (R1) Boc-D-Ile-OH, (R2) Boc-D-Phe-OH, (R3) Boc-Phe-OH, (R4) 4-tert-butyl-cyclohexanecarboxylic acid. The final crude product was purified using HPLC as described above, with a gradient of (B) 2, 0/2, 2/2, 6/20, 35/50. **1H NMR** (400 MHz, CHLOROFORM-*d*)  $\delta$  ppm 8.54 (br. s., 1 H) 7.29 - 7.55 (m, 4 H) 7.20 - 7.27 (m, 3 H) 6.98 - 7.19 (m, 4 H) 6.91 (br. s., 3 H) 3.99 (br. s., 1 H) 3.92 (br. s., 1 H) 3.52 (br. s., 2 H) 3.28 (d, *J*=10.51 Hz, 2 H) 3.20 (br. s., 1 H) 3.10 (d, *J*=12.84 Hz, 1 H) 3.00 (d, *J*=11.98 Hz, 3 H) 2.81 - 2.96 (m, 3 H) 2.75 (br. s., 1 H) 2.65 (d, *J*=13.57 Hz, 1 H) 2.58 (br. s., 1 H) 2.38 (br. s., 1 H) 2.14 (br. s., 1 H) 1.93 - 2.07 (m, 6 H) 1.90 (br. s., 1 H) 1.81 (br. s., 1 H) 1.72 (br. s., 2 H) 1.58 (d, *J*=12.35 Hz, 2 H) 1.33 (br. s., 1 H) 1.17 (br. s., 1 H) 0.89 - 1.06 (m, 6 H) 0.84 (br. s., 9 H) **m/z** calcd C<sub>40</sub>H<sub>67</sub>N<sub>5</sub>O [M+H]<sup>+</sup> 617.54, found (MS ESI) 618.15. **Purity** LCMS: 100% (TIC), 100% (214 nm, peak area); **RT** = 3.83 min

**2494-21:** (2R,3S)-N2-(((R)-1-((R)-2-(((S)-2-((3,5-bis(trifluoromethyl)phenethyl)amino)-3-phenylpropyl)amino)-3-phenylpropyl)pyrrolidin-2-yl)methyl)-3-methylpentane-1,2-diamine Using General Scheme (scheme 1) for the synthesis of penta-amines compound 2494-21 was synthesized using the following reagents: (R1) Boc-D-Ile-OH, (R2) Boc-D-Phe-OH, (R3) Boc-Phe-OH, (R4) 3,5-Bis(Trifluoromethyl)-Phenylacetic acid. The final crude product was purified using HPLC as described above, with a gradient of (B) 2, 0/2, 2/2, 6/20, 35/50. **1H NMR** (400 MHz, CHLOROFORM-*d*)  $\delta$  ppm 8.47 (br. s., 2 H) 8.20 (br. s., 1 H) 7.76 (br. s., 2 H) 7.68 (br. s., 2 H) 7.59 (br. s., 1 H) 7.29 - 7.47 (m, 6 H) 7.18 (br. s., 3 H) 7.12 (br. s., 1 H) 7.05 (br. s., 2 H) 3.99 (t, *J*=11.07 Hz, 1 H) 3.56 (br. s., 1 H) 3.50 (br. s., 1 H) 3.30 - 3.44 (m, 2 H) 3.00 - 3.29 (m, 7 H) 2.93 (d, *J*=12.72 Hz, 3 H) 2.66 (d, *J*=11.62 Hz, 1 H) 2.28 - 2.51 (m, 1 H) 2.20 (br. s., 1 H) 2.03 (br. s., 2 H) 1.96 (br. s., 1 H) 1.75 (br. s., 2 H) 1.36 (br. s., 1 H) 1.21 (br. s., 1 H) 0.95 (br. s., 3 H) 0.86 (br. s., 2 H) **m/z** calcd C<sub>39</sub>H<sub>53</sub>F<sub>6</sub>N<sub>5</sub> [M+H]<sup>+</sup> 705.42, found (MS ESI) 706.10. **Purity** LCMS: 100% (TIC), 100% (214 nm, peak area); **RT** = 3.89 min

**2494-22: (2R,3S)-N2-(((R)-1-((R)-2-(((R)-3-cyclohexyl-2-((4-ethoxyphenethyl)amino)propyl)amino)-3-phenylpropyl)pyrrolidin-2-yl)methyl)-3-methylpentane-1,2-diamine** Using General Scheme (scheme 1) for the synthesis of penta-amines compound 2494-22 was synthesized using the following reagents: (R1) Boc-D-Ile-OH, (R2) Boc-D-Phe-OH, (R3) Boc-D-Cha-OH, (R4) 4-ethoxyphenylacetic acid. The final crude product was purified using HPLC as described above, with a gradient of (B) 2, 0/2, 2/2, 6/20, 35/50. **1H NMR** (400 MHz, CHLOROFORM-*d*)  $\delta$  ppm 8.52 (br. s., 2 H) 7.33 (br. s., 4 H) 7.26 (br. s., 1 H) 7.18 (br. s., 3 H) 6.78 - 7.02 (m, 3 H) 6.70 (br. s., 1 H) 3.92 - 4.08 (m, 3 H) 3.52 (br. s., 1 H) 3.16 - 3.36 (m, 4 H) 3.12 (d,  $J=14.67$  Hz, 4 H) 3.01 (br. s., 1 H) 2.75 - 2.96 (m, 2 H) 2.70 (d,  $J=12.35$  Hz, 1 H) 2.59 (br. s., 1 H) 2.48 (t,  $J=11.62$  Hz, 1 H) 2.14 (br. s., 1 H) 2.05 (br. s., 3 H) 1.88 (br. s., 1 H) 1.71 (br. s., 5 H) 1.50 - 1.66 (m, 2 H) 1.41 (br. s., 3 H) 1.10 - 1.37 (m, 5 H) 0.89 - 1.06 (m, 4 H) 0.86 (br. s., 3 H) **m/z** calcd C<sub>39</sub>H<sub>65</sub>N<sub>5</sub>O [M+H]<sup>+</sup> 619.52, found (MS ESI) 620.15. **Purity** LCMS: 100% (TIC), 100% (214 nm, peak area); **RT** = 3.77 min

**2494-23: (2R,3S)-N2-(((R)-1-((R)-2-(((R)-2-(((4-(tert-butyl)cyclohexyl)methyl)amino)-3-cyclohexylpropyl)amino)-3-phenylpropyl)pyrrolidin-2-yl)methyl)-3-methylpentane-1,2-diamine.** Using General Scheme (scheme 1) for the synthesis of penta-amines compound 2494-23 was synthesized using the following reagents: (R1) Boc-D-Ile-OH, (R2) Boc-D-Phe-OH, (R3) Boc-D-Cha-OH, (R4) 4-tert-butyl-cyclohexanecarboxylic acid. The final crude product was purified using HPLC as described above, with a gradient of (B) 2, 0/2, 2/2, 6/20, 35/50. **1H NMR** (400 MHz, CHLOROFORM-*d*)  $\delta$  ppm 8.57 (br. s., 1 H) 7.33 (br. s., 2 H) 7.26 (br. s., 1 H) 7.19 (br. s., 2 H) 6.44 (br. s., 3 H) 3.69 - 3.97 (m, 1 H) 3.47 (br. s., 1 H) 3.25 (br. s., 1 H) 2.96 - 3.21 (m, 5 H) 2.83 - 2.96 (m, 2 H) 2.78 (br. s., 1 H) 2.68 (d,  $J=12.84$  Hz, 1 H) 2.40 - 2.58 (m, 2 H) 2.35 (br. s., 1 H) 2.18 (br. s., 1 H) 2.02 (br. s., 4 H) 1.77 - 1.98 (m, 5 H) 1.73 (br. s., 4 H) 1.45 - 1.67 (m, 5 H) 1.11 - 1.40 (m, 6 H) 1.02 (br. s., 4 H) 0.93 (br. s., 4 H) 0.85 (br. s., 9 H) **m/z** calcd C<sub>40</sub>H<sub>73</sub>N<sub>5</sub> [M+H]<sup>+</sup> 623.59, found (MS ESI) 624.30. **Purity** LCMS: 100% (TIC), 100% (214 nm, peak area); **RT** = 4.05 min

**2494-24: (2R,3S)-N2-(((R)-1-((R)-2-(((R)-2-((3,5-bis(trifluoromethyl)phenethyl)amino)-3-cyclohexylpropyl)amino)-3-phenylpropyl)pyrrolidin-2-yl)methyl)-3-methylpentane-1,2-diamine.** Using General Scheme (scheme 1) for the synthesis of penta-amines compound 2494-24 was synthesized using the following reagents: (R1) Boc-D-Ile-OH, (R2) Boc-D-Phe-OH, (R3) Boc-D-Cha-OH, (R4) 3,5-Bis(Trifluoromethyl)-Phenylacetic acid. The final crude product was purified using HPLC as described above, with a gradient of (B) 2, 0/2, 2/2, 6/20, 35/50. **1H NMR** (400 MHz, CHLOROFORM-*d*)  $\delta$  ppm 8.60 (br. s., 2 H) 7.72 - 7.92 (m, 3 H) 7.34 (br. s., 3 H) 7.26 (br. s., 1 H) 7.19 (br. s., 2 H) 6.55 (br. s., 2 H) 4.00 (br. s., 1 H) 3.95 (br. s., 1 H) 3.58 (br. s., 1 H) 3.46 (br. s., 1 H) 3.29 - 3.41 (m, 1 H) 3.15 - 3.29 (m, 4 H) 3.10 (br. s., 3 H) 3.02 (br. s., 1 H) 2.94 (d,  $J=12.35$  Hz, 1 H) 2.77 - 2.90 (m, 1 H) 2.70 (d,  $J=13.08$  Hz, 1 H) 2.46 - 2.62 (m, 2 H) 2.13 (br. s., 1 H) 2.03 (br. s., 2 H) 1.87 (br. s., 1 H) 1.73 (br. s., 5 H) 1.59 (br. s., 2 H) 1.50 (br. s., 1 H) 1.36 (br. s., 1 H) 1.11 - 1.33 (m, 4 H) 1.01 (br. s., 1 H) 0.94 (br. s., 3 H) 0.70 - 0.91 (m, 3 H) **m/z** calcd C<sub>39</sub>H<sub>59</sub>F<sub>6</sub>N<sub>5</sub> [M+H]<sup>+</sup> 711.47, found (MS ESI) 712.15. **Purity** LCMS: 100% (TIC), 100% (214 nm, peak area); **RT** = 4.05 min

**2494-25:** 4-((R)-3-(((R)-1-((R)-2-(((2R,3S)-1-amino-3-methylpentan-2-yl)amino)methyl)pyrrolidin-1-yl)-3-phenylpropan-2-yl)amino)-2-((4-ethoxyphenethyl)amino)propyl)phenol. Using General Scheme (scheme 1) for the synthesis of penta-amines compound 2494-25 was synthesized using the following reagents: (R1) Boc-D-Ile-OH, (R2) Boc-D-Phe-OH, (R3) Boc-D-Tyr(2-Br-Z)-OH, (R4) 4-ethoxyphenylacetic acid. The final crude product was purified using HPLC as described above, with a gradient of (B) 2, 0/2, 2/2, 6/20, 35/50. **1H NMR** (400 MHz, CHLOROFORM-*d*)  $\delta$  ppm 8.48 (br. s., 2 H) 7.23 (br. s., 2 H) 7.13 - 7.20 (m, 3 H) 7.09 (br. s., 1 H) 6.86 - 7.04 (m, 4 H) 6.83 (br. s., 6 H) 3.99 (br. s., 2 H) 3.84 (br. s., 1 H) 3.44 (br. s., 1 H) 3.21 (d,  $J=15.53$  Hz, 2 H) 3.14 (br. s., 2 H) 2.95 - 3.10 (m, 4 H) 2.78 - 2.94 (m, 4 H) 2.55 - 2.78 (m, 3 H) 2.48 (br. s., 1 H) 2.33 (d,  $J=11.00$  Hz, 1 H) 2.03 (br. s., 2 H) 1.84 (br. s., 1 H) 1.69 (br. s., 2 H) 1.40 (br. s., 3 H) 1.28 (br. s., 1 H) 1.15 (br. s., 1 H) 0.91 (br. s., 3 H) 0.81 (br. s., 3 H) **m/z** calcd C<sub>39</sub>H<sub>59</sub>N<sub>5</sub>O<sub>2</sub> [M+H]<sup>+</sup> 629.47, found (MS ESI) 630.15. **Purity** LCMS: 100% (TIC), 100% (214 nm, peak area); **RT** = 3.32 min

**2494-26:** 4-((R)-3-(((R)-1-((R)-2-(((2R,3S)-1-amino-3-methylpentan-2-yl)amino)methyl)pyrrolidin-1-yl)-3-phenylpropan-2-yl)amino)-2-(((4-(tert-butyl)cyclohexyl)methyl)amino)propyl)phenol. Using General Scheme (scheme 1) for the synthesis of penta-amines compound 2494-26 was synthesized using the following reagents: (R1) Boc-D-Ile-OH, (R2) Boc-D-Phe-OH, (R3) Boc-D-Tyr(2-Br-Z)-OH, (R4) 4-tert-butylcyclohexanecarboxylic acid. The final crude product was purified using HPLC as described above, with a gradient of (B) 2, 0/2, 2/2, 6/20, 35/50. **1H NMR** (400 MHz, CHLOROFORM-*d*)  $\delta$  ppm 8.54 (br. s., 1 H) 7.29 (br. s., 2 H) 7.26 (br. s., 1 H) 7.19 (br. s., 1 H) 7.02 (s, 2 H) 7.06 (s, 2 H) 6.88 (br. s., 3 H) 6.69 (br. s., 3 H) 3.87 (br. s., 1 H) 3.47 (br. s., 1 H) 3.29 (br. s., 1 H) 3.05 (br. s., 5 H) 2.70 - 2.96 (m, 4 H) 2.63 (d,  $J=11.37$  Hz, 2 H) 2.37 (d,  $J=12.96$  Hz, 1 H) 2.05 (br. s., 6 H) 1.94 (d,  $J=11.49$  Hz, 2 H) 1.83 (br. s., 2 H) 1.68 (br. s., 2 H) 1.57 (br. s., 2 H) 1.28 (br. s., 1 H) 1.16 (br. s., 1 H) 1.00 (br. s., 2 H) 0.92 (br. s., 3 H) 0.84 (br. s., 11 H) **m/z** calcd C<sub>40</sub>H<sub>67</sub>N<sub>5</sub>O [M+H]<sup>+</sup> 633.53, found (MS ESI) 634.30. **Purity** LCMS: 100% (TIC), 100% (214 nm, peak area); **RT** = 3.64 min

**2494-27:** N/A

**2494-28:** (3S)-4-((R)-2-(((S)-1-amino-3-methylbutan-2-yl)amino)methyl)pyrrolidin-1-yl)-3-(((S)-2-((4-ethoxyphenethyl)amino)-3-phenylpropyl)amino)butan-2-ol. Using General Scheme (scheme 1) for the synthesis of penta-amines compound 2494-28 was synthesized using the following reagents: (R1) Boc-Val-OH, (R2) Boc-D-Thr(Bzl)-OH, (R3) Boc-Phe-OH, (R4) 4-ethoxyphenylacetic acid. The final crude product was purified using HPLC as described above, with a gradient of (B) 2, 0/2, 2/2, 4/10, 40/38. **1H NMR** (400 MHz, CHLOROFORM-*d*)  $\delta$  ppm 8.53 (br. s., 1 H) 7.29 (br. s., 1 H) 7.25 (br. s., 1 H) 7.00 - 7.21 (m, 3 H) 6.83 (br. s., 2 H) 6.00 (br. s., 6 H) 4.02 (br. s., 2 H) 3.87 (br. s., 1 H) 3.56 (br. s., 1 H) 3.49 (br. s., 1 H) 3.27 - 3.42 (m, 1 H) 3.10 - 3.26 (m, 3 H) 3.05 (br. s., 2 H) 2.92 - 3.01 (m, 2 H) 2.86 (d,  $J=13.33$  Hz, 4 H) 2.69 (br. s., 1 H) 2.13 (br. s., 1 H) 2.00 (br. s., 4 H) 1.79 (br. s., 1 H) 1.41 (br. s., 2 H) 1.12 (br. s., 2 H) 1.01 (br. s., 1 H) 0.95 (br. s., 2 H) 0.87 (br. s., 3 H) **m/z** calcd C<sub>33</sub>H<sub>55</sub>N<sub>5</sub>O<sub>2</sub> [M+H]<sup>+</sup> 553.44, found (MS ESI) 554.20. **Purity** LCMS: 100% (TIC), 100% (214 nm, peak area); **RT** = 3.07 min

**2494-29:** (2R,3S)-4-((R)-2-(((S)-1-amino-3-methylbutan-2-yl)amino)methyl)pyrrolidin-1-yl)-3-(((S)-2-(((4-(tert-butyl)cyclohexyl)methyl)amino)-3-

**phenylpropyl)amino)butan-2-ol.** Using General Scheme (scheme 1) for the synthesis of penta-amines compound 2494-29 was synthesized using the following reagents: (R1) Boc-Val-OH, (R2) Boc-D-Thr(Bzl)-OH, (R3) Boc-Phe-OH, (R4) 4-tert-butyl-cyclohexanecarboxylic acid. The final crude product was purified using HPLC as described above, with a gradient of (B) 2, 0/2, 2/2, 6/20, 35/50. **<sup>1</sup>H NMR** (400 MHz, CHLOROFORM-*d*)  $\delta$  ppm 8.50 (br. s., 2 H) 7.33 (br. s., 2 H) 7.27 (br. s., 2 H) 6.09 (br. s., 6 H) 3.87 (br. s., 2 H) 3.54 - 3.72 (m, 1 H) 3.51 (br. s., 1 H) 3.29 - 3.45 (m, 1 H) 3.21 (br. s., 2 H) 2.95 - 3.14 (m, 3 H) 2.75 - 2.95 (m, 5 H) 2.70 (br. s., 1 H) 2.25 (br. s., 1 H) 2.14 (br. s., 1 H) 1.86 - 2.08 (m, 5 H) 1.77 (d,  $J=15.16$  Hz, 2 H) 1.55 (d,  $J=13.08$  Hz, 3 H) 1.14 (br. s., 3 H) 1.04 (br. s., 1 H) 0.97 (br. s., 4 H) 0.72 - 0.92 (m, 10 H) ***m/z*** calcd C<sub>34</sub>H<sub>63</sub>N<sub>5</sub>O [M+H]<sup>+</sup> 557.50, found (MS ESI) 558.20. **Purity LCMS:** 100% (TIC), 100% (214 nm, peak area); **RT** = 3.52min

**2494-30: (3S)-4-((R)-2-(((S)-1-amino-3-methylbutan-2-yl)amino)methyl)pyrrolidin-1-yl)-3-(((S)-2-((3,5-bis(trifluoromethyl)phenethyl)amino)-3-phenylpropyl)amino)butan-2-ol.** Using General Scheme (scheme 1) for the synthesis of penta-amines compound 2494-30 was synthesized using the following reagents: (R1) Boc-Val-OH, (R2) Boc-D-Thr(Bzl)-OH, (R3) Boc-Phe-OH, (R4) 3,5-Bis(Trifluoromethyl)-Phenylacetic acid. The final crude product was purified using HPLC as described above, with a gradient of (B) 2, 0/2, 2/2, 6/20, 35/50. **<sup>1</sup>H NMR** (400 MHz, CHLOROFORM-*d*)  $\delta$  ppm 8.48 (br. s., 2 H) 7.68 - 7.88 (m, 1 H) 7.64 (br. s., 1 H) 7.31 (br. s., 2 H) 7.25 (br. s., 2 H) 6.06 (br. s., 6 H) 3.91 (br. s., 1 H) 3.65 (t,  $J=11.07$  Hz, 1 H) 3.54 (br. s., 1 H) 3.38 (br. s., 1 H) 3.15 - 3.33 (m, 4 H) 3.09 (d,  $J=10.27$  Hz, 2 H) 3.00 (d,  $J=11.74$  Hz, 2 H) 2.92 (br. s., 2 H) 2.76 - 2.88 (m, 2 H) 2.17 (br. s., 1 H) 2.07 (br. s., 1 H) 2.01 (br. s., 2 H) 1.76 (br. s., 1 H) 1.10 - 1.23 (m, 2 H) 1.04 (br. s., 1 H) 0.97 (br. s., 2 H) 0.88 (br. s., 2 H) ***m/z*** calcd C<sub>33</sub>H<sub>49</sub>F<sub>6</sub>N<sub>5</sub>O [M+H]<sup>+</sup> 645.38, found (MS ESI) 646.05. **Purity LCMS:** 100% (TIC), 100% (214 nm, peak area); **RT** = 3.54 min

**2494-31: (3S)-4-((R)-2-(((S)-1-amino-3-methylbutan-2-yl)amino)methyl)pyrrolidin-1-yl)-3-(((R)-3-cyclohexyl-2-((4-ethoxyphenethyl)amino)propyl)amino)butan-2-ol.** Using General Scheme (scheme 1) for the synthesis of penta-amines compound 2494-31 was synthesized using the following reagents: (R1) Boc-Val-OH, (R2) Boc-D-Thr(Bzl)-OH, (R3) Boc-D-Cha-OH, (R4) 4-ethoxyphenylacetic acid. The final crude product was purified using HPLC as described above, with a gradient of (B) 2, 0/2, 2/2, 6/15, 35/40. **<sup>1</sup>H NMR** (400 MHz, CHLOROFORM-*d*)  $\delta$  ppm 8.51 (br. s., 2 H) 7.04 - 7.27 (m, 2 H) 6.80 - 6.96 (m, 2 H) 6.04 (br. s., 4 H) 3.91 - 4.13 (m, 3 H) 3.68 (t,  $J=11.74$  Hz, 1 H) 3.56 (br. s., 1 H) 3.39 (d,  $J=13.08$  Hz, 1 H) 3.15 - 3.32 (m, 3 H) 2.88 - 3.15 (m, 7 H) 2.81 (t,  $J=11.98$  Hz, 1 H) 1.95 - 2.23 (m, 5 H) 1.82 (br. s., 1 H) 1.68 (br. s., 5 H) 1.47 - 1.61 (m, 1 H) 1.41 (br. s., 3 H) 1.27 (br. s., 4 H) 1.09 - 1.22 (m, 2 H) 1.04 (br. s., 1 H) 0.97 (br. s., 3 H) 0.69 - 0.92 (m, 3 H) ***m/z*** calcd C<sub>33</sub>H<sub>61</sub>N<sub>5</sub>O<sub>2</sub> [M+H]<sup>+</sup> 559.48, found (MS ESI) 560.20. **Purity LCMS:** 100% (TIC), 100% (214 nm, peak area); **RT** = 3.32 min

**2494-32: (3S)-4-((R)-2-(((S)-1-amino-3-methylbutan-2-yl)amino)methyl)pyrrolidin-1-yl)-3-(((R)-2-(((4-(tert-butyl)cyclohexyl)methyl)amino)-3-cyclohexylpropyl)amino)butan-2-ol.** Using General Scheme (scheme 1) for the synthesis of penta-amines compound 2494-32 was synthesized using the following reagents: (R1) Boc-Val-OH, (R2) Boc-D-Thr(Bzl)-OH, (R3) Boc-D-Cha-OH, (R4) 4-tert-butyl-cyclohexanecarboxylic acid. The final crude product was purified using HPLC as described above, with a gradient of (B) 2, 0/2, 2/2, 6/20, 35/50. **<sup>1</sup>H NMR** (400 MHz, CHLOROFORM-*d*)  $\delta$  ppm 8.24 (br. s., 2 H) 5.58 (br. s., 5 H) 3.71 (br. s., 2 H)

3.39 (br. s., 1 H) 3.34 (br. s., 1 H) 3.12 (br. s., 1 H) 2.88 - 3.04 (m, 2 H) 2.74 - 2.86 (m, 3 H) 2.58 - 2.72 (m, 3 H) 2.37 - 2.58 (m, 1 H) 2.05 (br. s., 1 H) 1.91 (br. s., 1 H) 1.69 - 1.86 (m, 3 H) 1.63 (br. s., 2 H) 1.42 - 1.58 (m, 5 H) 1.36 (d,  $J=12.72$  Hz, 3 H) 1.29 (br. s., 2 H) 0.92 - 1.13 (m, 6 H) 0.67 - 0.90 (m, 8 H) 0.60 (br. s., 11 H) **m/z** calcd  $C_{34}H_{69}N_5O$   $[M+H]^+$  563.55, found (MS ESI) 564.25. **Purity** LCMS: 100% (TIC), 100% (214 nm, peak area); **RT** = 3.70 min

**2494-33:** (3S)-4-((R)-2-(((S)-1-amino-3-methylbutan-2-yl)amino)methyl)pyrrolidin-1-yl)-3-(((R)-2-((3,5-bis(trifluoromethyl)phenethyl)amino)-3-cyclohexylpropyl)amino)butan-2-ol. Using General Scheme (scheme 1) for the synthesis of penta-amines compound 2494-33 was synthesized using the following reagents: (R1) Boc-Val-OH, (R2) Boc-D-Thr(Bzl)-OH, (R3) Boc-D-Cha-OH, (R4) 3,5-Bis(Trifluoromethyl)-Phenylacetic acid. The final crude product was purified using HPLC as described above, with a gradient of (B) 2, 0/2, 2/2, 6/20, 35/50. **1H NMR** (400 MHz, CHLOROFORM-*d*)  $\delta$  ppm 8.50 (br. s., 2 H) 7.79 (br. s., 3 H) 6.09 (br. s., 5 H) 3.99 (br. s., 1 H) 3.63 - 3.84 (m, 1 H) 3.55 (br. s., 1 H) 3.45 (d,  $J=12.59$  Hz, 1 H) 3.34 (br. s., 2 H) 3.22 (br. s., 3 H) 3.02 - 3.16 (m, 2 H) 2.98 (br. s., 2 H) 2.91 (br. s., 1 H) 2.62 - 2.88 (m, 1 H) 2.25 (br. s., 1 H) 1.95 - 2.20 (m, 4 H) 1.86 (br. s., 1 H) 1.68 (br. s., 5 H) 1.54 (br. s., 1 H) 1.28 (br. s., 3 H) 1.21 (d,  $J=13.82$  Hz, 3 H) 1.04 (br. s., 1 H) 0.98 (br. s., 3 H) 0.89 (br. s., 4 H) **m/z** calcd  $C_{33}H_{55}F_6N_5O$   $[M+H]^+$  651.43, found (MS ESI) 652.20. **Purity** LCMS: 100% (TIC), 100% (214 nm, peak area); **RT** = 3.70 min

**2494-34:** 4-((2S)-3-(((2S)-1-((R)-2-(((S)-1-amino-3-methylbutan-2-yl)amino)methyl)pyrrolidin-1-yl)-3-hydroxybutan-2-yl)amino)-2-((4-ethoxyphenethyl)amino)propyl)phenol. Using General Scheme (scheme 1) for the synthesis of penta-amines compound 2494-34 was synthesized using the following reagents: (R1) Boc-Val-OH, (R2) Boc-D-Thr(Bzl)-OH, (R3) Boc-D-Tyr(2-Br-Z)-OH, (R4) 4-ethoxyphenylacetic acid. The final crude product was purified using HPLC as described above, with a gradient of (B) 2, 0/2, 2/2, 6/8, 35/35. **1H NMR** (400 MHz, DMSO-*d*6)  $\delta$  ppm 8.35 (br. s., 1 H) 7.02 - 7.29 (m, 3 H) 6.97 (br. s., 2 H) 6.76 - 6.90 (m, 3 H) 6.47 - 6.75 (m, 3 H) 6.17 (br. s., 1 H) 3.99 (br. s., 2 H) 3.71 (br. s., 1 H) 3.13 (br. s., 1 H) 2.93 (br. s., 2 H) 2.73 - 2.90 (m, 4 H) 2.69 (br. s., 3 H) 2.58 (br. s., 3 H) 2.33 - 2.48 (m, 2 H) 2.19 (br. s., 1 H) 1.82 - 2.03 (m, 2 H) 1.77 (br. s., 1 H) 1.65 (br. s., 3 H) 1.32 (br. s., 3 H) 1.06 (br. s., 2 H) 0.71 - 0.97 (m, 5 H) **m/z** calcd  $C_{33}H_{55}N_5O_3$   $[M+H]^+$  569.43 found (MS ESI) 570.20. **Purity** LCMS: 100% (TIC), 100% (214 nm, peak area); **RT** = 2.83 min

**2494-35:** 4-((2S)-3-(((2S)-1-((R)-2-(((S)-1-amino-3-methylbutan-2-yl)amino)methyl)pyrrolidin-1-yl)-3-hydroxybutan-2-yl)amino)-2-(((4-(tert-butyl)cyclohexyl)methyl)amino)propyl)phenol. Using General Scheme (scheme 1) for the synthesis of penta-amines compound 2494-35 was synthesized using the following reagents: (R1) Boc-Val-OH, (R2) Boc-D-Thr(Bzl)-OH, (R3) Boc-D-Tyr(2-Br-Z)-OH, (R4) 4-tert-butylcyclohexanecarboxylic acid. The final crude product was purified using HPLC as described above, with a gradient of (B) 2, 0/2, 2/2, 6/15, 35/40. **1H NMR** (400 MHz, CHLOROFORM-*d*)  $\delta$  ppm 8.14 (br. s., 2 H) 7.29 (br. s., 1 H) 7.16 (br. s., 1 H) 6.86 (d,  $J=12.72$  Hz, 1 H) 4.29 (br. s., 1 H) 4.02 (br. s., 2 H) 3.90 (br. s., 4 H) 3.39 (br. s., 7 H) 3.29 (br. s., 3 H) 3.18 (br. s., 7 H) 2.47 (br. s., 1 H) 2.38 (br. s., 1 H) 2.12 (br. s., 4 H) 1.90 (br. s., 2 H) 1.71 (br. s., 1 H) 1.60 (br. s., 2 H) 1.43 (br. s., 2 H) 1.28 (br. s., 2 H) 1.15 (br. s., 3 H) 1.01 (br. s., 4 H) 0.85 (br. s., 6 H) 0.40 (br. s.,

1 H) **m/z** calcd C<sub>34</sub>H<sub>63</sub>N<sub>5</sub>O<sub>2</sub> [M+H]<sup>+</sup> 573.50, found (MS ESI) 574.20. **Purity** LCMS: 100% (TIC), 100% (214 nm, peak area); **RT** = 3.26 min

**2494-36:** **4-((2S)-3-(((2S)-1-((R)-2-(((S)-1-amino-3-methylbutan-2-yl)amino)methyl)pyrrolidin-1-yl)-3-hydroxybutan-2-yl)amino)-2-((3,5-bis(trifluoromethyl)phenethyl)amino)propyl)phenol.** Using General Scheme (scheme 1) for the synthesis of penta-amines compound 2494-36 was synthesized using the following reagents: (R1) Boc-Val-OH, (R2) Boc-D-Thr(Bzl)-OH, (R3) Boc-D-Tyr(2-Br-Z)-OH, (R4) 3,5-Bis(Trifluoromethyl)-Phenylacetic acid. The final crude product was purified using HPLC as described above, with a gradient of (B) 2, 0/2, 2/2, 6/10, 35/40. **1H NMR** (400 MHz, DMSO-*d*6)  $\delta$  ppm 8.36 (br. s., 1 H) 8.13 (d, *J*=19.81 Hz, 1 H) 7.95 (br. s., 2 H) 7.16 (br. s., 1 H) 6.97 (d, *J*=6.85 Hz, 2 H) 6.62 - 6.81 (m, 2 H) 3.69 (br. s., 1 H) 3.07 (br. s., 2 H) 2.94 (br. s., 3 H) 2.75 - 2.89 (m, 4 H) 2.66 (br. s., 2 H) 2.60 (br. s., 3 H) 2.43 (br. s., 1 H) 2.34 (d, *J*=12.23 Hz, 1 H) 2.12 (br. s., 1 H) 1.91 (br. s., 3 H) 1.82 (br. s., 1 H) 1.75 (br. s., 1 H) 1.45 - 1.69 (m, 3 H) 1.03 (br. s., 2 H) 0.83 (s, 3 H) 0.87 (s, 2 H) 0.74 (br. s., 1 H) **m/z** calcd C<sub>33</sub>H<sub>49</sub>F<sub>6</sub>N<sub>5</sub>O<sub>2</sub> [M+H]<sup>+</sup> 661.38, found (MS ESI) 662.05. **Purity** LCMS: 100% (TIC), 100% (214 nm, peak area); **RT** = 3.29 min

**2494-37:** **(S)-N2-(((R)-1-((S)-3-cyclohexyl-2-(((R)-2-((4-ethoxyphenethyl)amino)-3-phenylpropyl)amino)propyl)pyrrolidin-2-yl)methyl)-3-methylbutane-1,2-diamine.** Using General Scheme (scheme 1) for the synthesis of penta-amines compound 2494-37 was synthesized using the following reagents: (R1) Boc-Val-OH, (R2) Boc-Cha-OH, (R3) Boc-Phe-OH, (R4) 4-ethoxyphenylacetic acid. The final crude product was purified using HPLC as described above, with a gradient of (B) 2, 0/2, 2/2, 6/10, 35/40. **1H NMR** (400 MHz, CHLOROFORM-*d*)  $\delta$  ppm 8.43 (br. s., 2 H) 7.14 (br. s., 2 H) 7.09 (br. s., 2 H) 6.86 - 7.06 (m, 3 H) 6.62 - 6.74 (m, 2 H) 6.18 (br. s., 2 H) 3.87 (br. s., 2 H) 3.76 (br. s., 1 H) 3.18 - 3.33 (m, 2 H) 3.13 (br. s., 1 H) 2.88 - 3.05 (m, 4 H) 2.86 (br. s., 1 H) 2.78 (d, *J*=19.93 Hz, 4 H) 2.45 - 2.72 (m, 4 H) 1.81 - 1.98 (m, 3 H) 1.77 (br. s., 1 H) 1.35 - 1.61 (m, 6 H) 1.27 (br. s., 4 H) 1.13 (br. s., 1 H) 0.95 - 1.08 (m, 3 H) 0.93 (br. s., 1 H) 0.83 (br. s., 3 H) 0.71 (br. s., 3 H) 0.40 - 0.67 (m, 2 H) **m/z** calcd C<sub>38</sub>H<sub>63</sub>N<sub>5</sub>O [M+H]<sup>+</sup> 605.50, found (MS ESI) 606.15. **Purity** LCMS: 100% (TIC), 100% (214 nm, peak area); **RT** = 3.64 min

**2494-38:** **(S)-N2-(((R)-1-((S)-2-(((R)-2-(((4-(tert-butyl)cyclohexyl)methyl)amino)-3-phenylpropyl)amino)-3-cyclohexylpropyl)pyrrolidin-2-yl)methyl)-3-methylbutane-1,2-diamine.** Using General Scheme (scheme 1) for the synthesis of penta-amines compound 2494-38 was synthesized using the following reagents: (R1) Boc-Val-OH, (R2) Boc-Cha-OH, (R3) Boc-Phe-OH, (R4) 4-tert-butyl-cyclohexanecarboxylic acid. The final crude product was purified using HPLC as described above, with a gradient of (B) 2, 0/2, 2/2, 6/15, 35/45. **1H NMR** (400 MHz, CHLOROFORM-*d*)  $\delta$  ppm 8.58 (br. s., 1 H) 7.29 (s, 1 H) 7.31 (s, 2 H) 6.03 (br. s., 4 H) 3.69 (br. s., 1 H) 3.35 (br. s., 2 H) 3.01 - 3.20 (m, 3 H) 2.90 - 3.01 (m, 4 H) 2.86 (br. s., 2 H) 2.79 (d, *J*=14.31 Hz, 4 H) 2.24 (br. s., 1 H) 1.98 (br. s., 4 H) 1.89 (d, *J*=13.08 Hz, 1 H) 1.72 - 1.84 (m, 2 H) 1.48 - 1.72 (m, 8 H) 1.38 (br. s., 2 H) 1.27 (br. s., 1 H) 1.10 - 1.22 (m, 3 H) 1.04 (br. s., 2 H) 0.98 (br. s., 5 H) 0.84 (br. s., 13 H) **m/z** calcd C<sub>39</sub>H<sub>71</sub>N<sub>5</sub> [M+H]<sup>+</sup> 609.57, found (MS ESI) 610.25. **Purity** LCMS: 100% (TIC), 100% (214 nm, peak area); **RT** = 3.94 min

**2494-39:** **(S)-N2-(((R)-1-((S)-2-(((R)-2-((3,5-bis(trifluoromethyl)phenethyl)amino)-3-phenylpropyl)amino)-3-cyclohexylpropyl)pyrrolidin-2-yl)methyl)-3-methylbutane-1,2-**



**diamine.** Using General Scheme (scheme 1) for the synthesis of penta-amines compound 2494-39 was synthesized using the following reagents: (R1) Boc-Val-OH, (R2) Boc-Cha-OH, (R3) Boc-Phe-OH, (R4) 3,5-Bis(Trifluoromethyl)-Phenylacetic acid. The final crude product was purified using HPLC as described above, with a gradient of (B) 2, 0/2, 2/2, 6/15, 35/45. **<sup>1</sup>H NMR** (400 MHz, CHLOROFORM-*d*)  $\delta$  ppm 8.55 (br. s., 1 H) 7.76 (br. s., 1 H) 7.69 (br. s., 2 H) 7.49 (br. s., 2 H) 7.16 (br. s., 2 H) 6.35 (br. s., 3 H) 3.89 (br. s., 1 H) 3.49 (br. s., 2 H) 3.32 (br. s., 3 H) 3.11 (br. s., 4 H) 2.98 (br. s., 5 H) 2.79 (d, *J*=15.89 Hz, 4 H) 2.06 (br. s., 2 H) 1.98 (br. s., 1 H) 1.83 (br. s., 1 H) 1.66 (br. s., 3 H) 1.59 (br. s., 2 H) 1.45 (br. s., 1 H) 1.24 - 1.38 (m, 1 H) 1.07 - 1.23 (m, 4 H) 0.98 (br. s., 3 H) 0.86 (br. s., 3 H) 0.76 (d, *J*=11.13 Hz, 1 H) ***m/z*** calcd C<sub>38</sub>H<sub>57</sub>F<sub>6</sub>N<sub>5</sub> [M+H]<sup>+</sup> 697.45, found (MS ESI) 698.15. **Purity** LCMS: 100% (TIC), 100% (214 nm, peak area); **RT** = 3.95 min

**2494-40: (S)-N2-(((R)-1-((S)-3-cyclohexyl-2-(((R)-3-cyclohexyl-2-((4-ethoxyphenethyl)amino)propyl)amino)propyl)pyrrolidin-2-yl)methyl)-3-methylbutane-1,2-diamine.** Using General Scheme (scheme 1) for the synthesis of penta-amines compound 2494-40y was synthesized using the following reagents: (R1) Boc-Val-OH, (R2) Boc-Cha-OH, (R3) Boc-D-Cha-OH, (R4) 4-ethoxyphenylacetic acid. The final crude product was purified using HPLC as described above, with a gradient of (B) 2, 0/2, 2/2, 6/15, 35/45. **<sup>1</sup>H NMR** (400 MHz, CHLOROFORM-*d*)  $\delta$  ppm 8.39 (br. s., 2 H) 7.03 (d, *J*=7.09 Hz, 2 H) 6.69 (d, *J*=6.11 Hz, 2 H) 5.86 (br. s., 2 H) 3.86 (br. s., 3 H) 3.43 (br. s., 1 H) 3.27 (d, *J*=8.68 Hz, 2 H) 3.08 (d, *J*=10.88 Hz, 2 H) 2.89 - 3.03 (m, 4 H) 2.79 - 2.89 (m, 3 H) 2.74 (br. s., 1 H) 2.66 (d, *J*=11.37 Hz, 2 H) 2.50 (br. s., 1 H) 1.97 (br. s., 2 H) 1.86 (br. s., 3 H) 1.37 - 1.64 (m, 12 H) 1.26 (br. s., 3 H) 0.96 - 1.20 (m, 8 H) 0.82 (br. s., 6 H) 0.71 (br. s., 4 H) ***m/z*** calcd C<sub>38</sub>H<sub>69</sub>N<sub>5</sub>O [M+H]<sup>+</sup> 611.55, found (MS ESI) 612.25. **Purity** LCMS: 100% (TIC), 100% (214 nm, peak area); **RT** = 3.84 min

**2494-41: (S)-N2-(((R)-1-((S)-2-(((R)-2-(((4-(tert-butyl)cyclohexyl)methyl)amino)-3-cyclohexylpropyl)amino)-3-cyclohexylpropyl)pyrrolidin-2-yl)methyl)-3-methylbutane-1,2-diamine.** Using General Scheme (scheme 1) for the synthesis of penta-amines compound 2494-41 was synthesized using the following reagents: (R1) Boc-Val-OH, (R2) Boc-Cha-OH, (R3) Boc-D-Cha-OH, (R4) 4-tert-butyl-cyclohexanecarboxylic acid. The final crude product was purified using HPLC as described above, with a gradient of (B) 2, 0/2, 2/2, 6/20, 35/50. **<sup>1</sup>H NMR** (400 MHz, CHLOROFORM-*d*)  $\delta$  ppm 8.54 (br. s., 1 H) 6.60 (br. s., 4 H) 3.98 (br. s., 1 H) 3.55 (br. s., 1 H) 3.35 (d, *J*=9.41 Hz, 1 H) 3.27 (br. s., 1 H) 3.20 (d, *J*=10.15 Hz, 1 H) 3.04 (br. s., 2 H) 2.88 - 3.01 (m, 3 H) 2.85 (br. s., 1 H) 2.74 - 2.82 (m, 1 H) 2.71 (br. s., 1 H) 2.46 - 2.68 (m, 1 H) 2.27 (br. s., 1 H) 2.09 (br. s., 2 H) 2.01 (br. s., 5 H) 1.87 (br. s., 2 H) 1.66 - 1.82 (m, 10 H) 1.60 (br. s., 3 H) 1.55 (br. s., 3 H) 1.11 - 1.38 (m, 8 H) 0.97 (s, 5 H) 1.01 (s, 4 H) 0.85 (br. s., 11 H) ***m/z*** calcd C<sub>39</sub>H<sub>77</sub>N<sub>5</sub> [M+H]<sup>+</sup> 615.62, found (MS ESI) 616.25. **Purity** LCMS: 100% (TIC), 100% (214 nm, peak area); **RT** = 4.09 min

**2494-42: (S)-N2-(((R)-1-((S)-2-(((R)-2-((3,5-bis(trifluoromethyl)phenethyl)amino)-3-cyclohexylpropyl)amino)-3-cyclohexylpropyl)pyrrolidin-2-yl)methyl)-3-methylbutane-1,2-diamine.** Using General Scheme (scheme 1) for the synthesis of penta-amines compound 2494-42 was synthesized using the following reagents: (R1) Boc-Val-OH, (R2) Boc-Cha-OH, (R3) Boc-D-Cha-OH, (R4) 3,5-Bis(Trifluoromethyl)-Phenylacetic acid. The final crude product was purified using HPLC as described above, with a gradient of (B) 2, 0/2, 2/2, 6/20, 35/50. **<sup>1</sup>H NMR** (400 MHz, CHLOROFORM-*d*)  $\delta$  ppm 8.55 (br. s., 1 H) 7.77 (s, 1 H) 7.80 (s, 1 H) 6.13

(br. s., 3 H) 5.73 (br. s., 1 H) 3.96 (br. s., 1 H) 3.57 (br. s., 1 H) 3.37 - 3.49 (m, 2 H) 3.32 (br. s., 1 H) 3.23 (br. s., 2 H) 3.07 (d,  $J=11.13$  Hz, 3 H) 2.89 - 3.03 (m, 2 H) 2.80 (br. s., 2 H) 2.68 (br. s., 1 H) 2.12 (br. s., 2 H) 2.01 (br. s., 4 H) 1.64 - 1.83 (m, 10 H) 1.57 (br. s., 3 H) 1.12 - 1.38 (m, 8 H) 1.04 (br. s., 1 H) 0.90 - 1.01 (m, 5 H) 0.86 (br. s., 4 H) **m/z** calcd  $C_{38}H_{63}F_6N_5$   $[M+H]^+$  703.50, found (MS ESI) 704.20. **Purity** LCMS: 100% (TIC), 100% (214 nm, peak area); **RT** = 4.11 min

**2494-43:** **4-((R)-3-(((S)-1-((R)-2-(((S)-1-amino-3-methylbutan-2-yl)amino)methyl)pyrrolidin-1-yl)-3-cyclohexylpropan-2-yl)amino)-2-((4-ethoxyphenethyl)amino)propyl)phenol.** Using General Scheme (scheme 1) for the synthesis of penta-amines compound 2494-43 was synthesized using the following reagents: (R1) Boc-Val-OH, (R2) Boc-Cha-OH, (R3) Boc-D-Tyr(2-Br-Z)-OH, (R4) 4-ethoxyphenylacetic acid. The final crude product was purified using HPLC as described above, with a gradient of (B) 2, 0/2, 2/2, 6/10, 35/40. **1H NMR** (400 MHz, CHLOROFORM-*d*)  $\delta$  ppm 8.51 (br. s., 2 H) 7.29 (br. s., 1 H) 7.13 (d,  $J=6.72$  Hz, 2 H) 7.07 (br. s., 1 H) 6.94 (br. s., 2 H) 6.82 (br. s., 4 H) 6.55 (br. s., 3 H) 4.00 (br. s., 2 H) 3.88 (br. s., 1 H) 3.47 (br. s., 2 H) 3.38 (br. s., 1 H) 3.19 (br. s., 2 H) 3.07 (br. s., 5 H) 2.78 - 2.99 (m, 3 H) 2.56 - 2.77 (m, 2 H) 2.23 (br. s., 1 H) 2.01 (br. s., 4 H) 1.52 - 1.80 (m, 5 H) 1.40 (br. s., 3 H) 1.27 (br. s., 1 H) 1.14 (br. s., 3 H) 1.03 (br. s., 1 H) 0.93 (br. s., 2 H) 0.81 (br. s., 3 H) **m/z** calcd  $C_{38}H_{63}N_5O_2$   $[M+H]^+$  621.50, found (MS ESI) 622.20. **Purity** LCMS: 100% (TIC), 100% (214 nm, peak area); **RT** = 3.39 min

**2494-44:** **4-((R)-3-(((S)-1-((R)-2-(((S)-1-amino-3-methylbutan-2-yl)amino)methyl)pyrrolidin-1-yl)-3-cyclohexylpropan-2-yl)amino)-2-(((4-(tert-butyl)cyclohexyl)methyl)amino)propyl)phenol.** Using General Scheme (scheme 1) for the synthesis of penta-amines compound 2494-44 was synthesized using the following reagents: (R1) Boc-Val-OH, (R2) Boc-Cha-OH, (R3) Boc-D-Tyr(2-Br-Z)-OH, (R4) 4-tert-butylcyclohexanecarboxylic acid. The final crude product was purified using HPLC as described above, with a gradient of (B) 2, 0/2, 2/2, 6/15, 35/45. **1H NMR** (400 MHz, CHLOROFORM-*d*)  $\delta$  ppm 8.53 (br. s., 1 H) 7.01 (br. s., 2 H) 6.75 - 6.92 (m, 3 H) 6.68 (br. s., 5 H) 3.82 (br. s., 1 H) 3.40 (br. s., 2 H) 3.14 - 3.31 (m, 1 H) 3.07 (d,  $J=10.27$  Hz, 3 H) 2.96 (br. s., 2 H) 2.64 - 2.91 (m, 5 H) 2.27 (br. s., 1 H) 2.03 (br. s., 7 H) 1.89 (d,  $J=14.67$  Hz, 2 H) 1.80 (br. s., 2 H) 1.66 (br. s., 3 H) 1.59 (br. s., 4 H) 1.41 (br. s., 1 H) 1.08 - 1.35 (m, 5 H) 0.96 (s, 3 H) 0.99 (s, 3 H) 0.85 (br. s., 10 H) **m/z** calcd  $C_{39}H_{71}N_5O$   $[M+H]^+$  625.57, found (MS ESI) 626.25. **Purity** LCMS: 100% (TIC), 100% (214 nm, peak area); **RT** = 3.73 min

**2494-45:** **4-((R)-3-(((S)-1-((R)-2-(((S)-1-amino-3-methylbutan-2-yl)amino)methyl)pyrrolidin-1-yl)-3-cyclohexylpropan-2-yl)amino)-2-((3,5-bis(trifluoromethyl)phenethyl)amino)propyl)phenol.** Using General Scheme (scheme 1) for the synthesis of penta-amines compound 2494-45 was synthesized using the following reagents: (R1) Boc-Val-OH, (R2) Boc-Cha-OH, (R3) Boc-D-Tyr(2-Br-Z)-OH, (R4) 3,5-Bis(Trifluoromethyl)-Phenylacetic acid. The final crude product was purified using HPLC as described above, with a gradient of (B) 2, 0/2, 2/2, 6/15, 35/45. **1H NMR** (400 MHz, CHLOROFORM-*d*)  $\delta$  ppm 8.54 (br. s., 1 H) 7.74 (br. s., 2 H) 6.95 (br. s., 2 H) 6.61 - 6.87 (m, 3 H) 6.42 (br. s., 5 H) 3.85 (br. s., 1 H) 3.47 (br. s., 2 H) 3.33 (br. s., 2 H) 3.26 (br. s., 2 H) 3.06 (br. s., 4 H) 2.91 (d,  $J=14.31$  Hz, 2 H) 2.80 (br. s., 1 H) 2.52 - 2.77 (m, 3 H) 2.01 (br. s., 6 H) 1.85 (br. s., 1 H) 1.54 - 1.75 (m, 4 H) 1.45 (br. s., 1 H) 1.14 (br. s., 4 H) 1.05 (br. s., 1 H) 0.96

(br. s., 2 H) 0.90 (br. s., 1 H) 0.83 (br. s., 3 H) **m/z** calcd C<sub>38</sub>H<sub>57</sub>F<sub>6</sub>N<sub>5</sub>O [M+H]<sup>+</sup> 713.45, found (MS ESI) 714.15. **Purity** LCMS: 100% (TIC), 100% (214 nm, peak area); **RT** = 3.72 min

**2494-46:** (S)-N<sub>2</sub>-(((R)-1-((R)-2-(((S)-2-((4-ethoxyphenethyl)amino)-3-phenylpropyl)amino)-3-phenylpropyl)pyrrolidin-2-yl)methyl)-3-methylbutane-1,2-diamine. Using General Scheme (scheme 1) for the synthesis of penta-amines compound 2494-46 was synthesized using the following reagents: (R1) Boc-Val-OH, (R2) Boc-D-Phe-OH, (R3) Boc-Phe-OH, (R4) 4-ethoxyphenylacetic acid. The final crude product was purified using HPLC as described above, with a gradient of (B) 2, 0/2, 2/2, 6/15, 35/45. **1H NMR** (400 MHz, CHLOROFORM-*d*) δ ppm 8.53 (br. s., 2 H) 7.29 - 7.54 (m, 3 H) 7.21 (br. s., 3 H) 7.03 - 7.17 (m, 4 H) 6.84 (d, *J*=6.36 Hz, 2 H) 5.90 (br. s., 4 H) 4.02 (br. s., 2 H) 3.81 (t, *J*=11.25 Hz, 1 H) 3.57 (br. s., 1 H) 3.43 (br. s., 1 H) 3.25 (br. s., 3 H) 3.11 (br. s., 5 H) 2.95 (d, *J*=12.35 Hz, 2 H) 2.69 - 2.88 (m, 3 H) 2.62 (br. s., 1 H) 2.52 (br. s., 2 H) 2.22 (br. s., 1 H) 1.79 - 2.07 (m, 4 H) 1.42 (br. s., 2 H) 0.97 (br. s., 2 H) 0.88 (br. s., 3 H) **m/z** calcd C<sub>38</sub>H<sub>57</sub>N<sub>5</sub>O [M+H]<sup>+</sup> 599.46, found (MS ESI) 600.20. **Purity** LCMS: 100% (TIC), 100% (214 nm, peak area); **RT** = 3.49 min

**2494-47:** (S)-N<sub>2</sub>-(((R)-1-((R)-2-(((S)-2-(((4-(tert-butyl)cyclohexyl)methyl)amino)-3-phenylpropyl)amino)-3-phenylpropyl)pyrrolidin-2-yl)methyl)-3-methylbutane-1,2-diamine. Using General Scheme (scheme 1) for the synthesis of penta-amines compound 2494-47 was synthesized using the following reagents: (R1) Boc-Val-OH, (R2) Boc-D-Phe-OH, (R3) Boc-Phe-OH, (R4) 4-tert-butyl-cyclohexanecarboxylic acid. The final crude product was purified using HPLC as described above, with a gradient of (B) 2, 0/2, 2/2, 6/15, 35/45. **1H NMR** (400 MHz, CHLOROFORM-*d*) δ ppm 8.51 (br. s., 2 H) 7.35 (br. s., 4 H) 7.09 (br. s., 5 H) 6.04 (br. s., 4 H) 3.85 (t, *J*=11.19 Hz, 1 H) 3.61 (br. s., 1 H) 3.43 (br. s., 1 H) 3.26 (br. s., 3 H) 3.00 - 3.18 (m, 3 H) 2.97 (br. s., 2 H) 2.67 - 2.93 (m, 4 H) 2.53 (br. s., 2 H) 2.34 (br. s., 1 H) 2.19 (br. s., 1 H) 2.03 (br. s., 3 H) 1.92 (d, *J*=13.33 Hz, 2 H) 1.84 (d, *J*=15.53 Hz, 2 H) 1.58 (d, *J*=14.31 Hz, 3 H) 0.97 (br. s., 6 H) 0.85 (br. s., 11 H) **m/z** calcd C<sub>39</sub>H<sub>65</sub>N<sub>5</sub> [M+H]<sup>+</sup> 603.52, found (MS ESI) 604.25. **Purity** LCMS: 100% (TIC), 100% (214 nm, peak area); **RT** = 3.78 min

**2494-48:** (S)-N<sub>2</sub>-(((R)-1-((R)-2-(((S)-2-((3,5-bis(trifluoromethyl)phenethyl)amino)-3-phenylpropyl)amino)-3-phenylpropyl)pyrrolidin-2-yl)methyl)-3-methylbutane-1,2-diamine. Using General Scheme (scheme 1) for the synthesis of penta-amines compound 2494-48 was synthesized using the following reagents: (R1) Boc-Val-OH, (R2) Boc-D-Phe-OH, (R3) Boc-Phe-OH, (R4) 3,5-Bis(Trifluoromethyl)-Phenylacetic acid. The final crude product was purified using HPLC as described above, with a gradient of (B) 2, 0/2, 2/2, 6/15, 35/45. **1H NMR** (400 MHz, CHLOROFORM-*d*) δ ppm 8.57 (br. s., 2 H) 7.75 (br. s., 1 H) 7.63 - 7.72 (m, 2 H) 7.31 - 7.44 (m, 2 H) 7.29 (br. s., 1 H) 7.18 - 7.27 (m, 3 H) 7.10 (br. s., 2 H) 5.89 (br. s., 5 H) 4.06 (br. s., 1 H) 3.83 (t, *J*=11.31 Hz, 1 H) 3.58 (br. s., 1 H) 3.22 - 3.43 (m, 4 H) 3.09 - 3.21 (m, 4 H) 3.05 (br. s., 1 H) 2.75 - 3.01 (m, 4 H) 2.43 - 2.71 (m, 3 H) 2.26 (br. s., 1 H) 2.15 (br. s., 1 H) 1.91 - 2.07 (m, 3 H) 1.85 (br. s., 1 H) 1.73 (br. s., 1 H) 0.98 (br. s., 2 H) 0.88 (br. s., 3 H) **m/z** calcd C<sub>38</sub>H<sub>51</sub>F<sub>6</sub>N<sub>5</sub> [M+H]<sup>+</sup> 691.40, found (MS ESI) 692.15. **Purity** LCMS: 100% (TIC), 100% (214 nm, peak area); **RT** = 3.79 min

**2494-49:** (S)-N<sub>2</sub>-(((R)-1-((R)-2-(((R)-3-cyclohexyl-2-((4-ethoxyphenethyl)amino)propyl)amino)-3-phenylpropyl)pyrrolidin-2-yl)methyl)-3-methylbutane-1,2-diamine. Using General Scheme (scheme 1) for the synthesis of penta-

amines compound 2494-49 was synthesized using the following reagents: (R1) Boc-Val-OH, (R2) Boc-D-Phe-OH, (R3) Boc-D-Cha-OH, (R4) 4-ethoxyphenylacetic acid. The final crude product was purified using HPLC as described above, with a gradient of (B) 2, 0/2, 2/2, 6/15, 35/45. **<sup>1</sup>H NMR** (400 MHz, CHLOROFORM-*d*)  $\delta$  ppm 8.43 (br. s., 2 H) 7.18 (br. s., 2 H) 7.10 (br. s., 1 H) 6.91 - 7.07 (m, 3 H) 6.70 (d,  $J=6.36$  Hz, 2 H) 5.85 (br. s., 4 H) 3.82 - 4.00 (m, 2 H) 3.74 (t,  $J=11.49$  Hz, 1 H) 3.05 - 3.24 (m, 4 H) 2.89 - 3.05 (m, 6 H) 2.82 (d,  $J=12.10$  Hz, 2 H) 2.66 (t,  $J=12.29$  Hz, 1 H) 2.25 - 2.52 (m, 2 H) 2.05 (br. s., 1 H) 1.73 - 1.94 (m, 6 H) 1.48 - 1.72 (m, 5 H) 1.42 (br. s., 2 H) 1.27 (br. s., 3 H) 0.94 - 1.21 (m, 4 H) 0.63 - 0.89 (m, 7 H) ***m/z*** calcd C<sub>38</sub>H<sub>63</sub>N<sub>5</sub>O [M+H]<sup>+</sup> 605.50, found (MS ESI) 606.15. **Purity** LCMS: 100% (TIC), 100% (214 nm, peak area); **RT** = 3.69 min

**2494-50:** (S)-N<sub>2</sub>-(((R)-1-((R)-2-(((R)-2-(((4-(tert-butyl)cyclohexyl)methyl)amino)-3-cyclohexylpropyl)amino)-3-phenylpropyl)pyrrolidin-2-yl)methyl)-3-methylbutane-1,2-diamine. Using General Scheme (scheme 1) for the synthesis of penta-amines compound 2494-50 was synthesized using the following reagents: (R1) Boc-Val-OH, (R2) Boc-D-Phe-OH, (R3) Boc-D-Cha-OH, (R4) 4-tert-butyl-cyclohexanecarboxylic acid. The final crude product was purified using HPLC as described above, with a gradient of (B) 2, 0/2, 2/2, 6/20, 35/50. **<sup>1</sup>H NMR** (400 MHz, CHLOROFORM-*d*)  $\delta$  ppm 8.58 (br. s., 1 H) 7.33 (br. s., 2 H) 7.01 - 7.27 (m, 3 H) 6.31 (br. s., 4 H) 4.01 (br. s., 1 H) 3.82 (d,  $J=10.51$  Hz, 1 H) 3.05 - 3.32 (m, 6 H) 2.88 - 3.05 (m, 2 H) 2.70 - 2.87 (m, 2 H) 2.60 (t,  $J=11.55$  Hz, 1 H) 2.49 (d,  $J=11.86$  Hz, 1 H) 2.30 (br. s., 1 H) 2.14 (br. s., 1 H) 1.95 - 2.07 (m, 5 H) 1.67 - 1.95 (m, 8 H) 1.58 (br. s., 4 H) 1.24 - 1.46 (m, 3 H) 1.22 (br. s., 2 H) 1.02 (br. s., 3 H) 0.97 (br. s., 4 H) 0.86 (br. s., 10 H) ***m/z*** calcd C<sub>39</sub>H<sub>71</sub>N<sub>5</sub> [M+H]<sup>+</sup> 609.57, found (MS ESI) 610.35. **Purity** LCMS: 100% (TIC), 100% (214 nm, peak area); **RT** = 3.99 min

**2494-51:** (S)-N<sub>2</sub>-(((R)-1-((R)-2-(((R)-2-((3,5-bis(trifluoromethyl)phenethyl)amino)-3-cyclohexylpropyl)amino)-3-phenylpropyl)pyrrolidin-2-yl)methyl)-3-methylbutane-1,2-diamine. Using General Scheme (scheme 1) for the synthesis of penta-amines compound 2494-51 was synthesized using the following reagents: (R1) Boc-Val-OH, (R2) Boc-D-Phe-OH, (R3) Boc-D-Cha-OH, (R4) 3,5-Bis(Trifluoromethyl)-Phenylacetic acid. The final crude product was purified using HPLC as described above, with a gradient of (B) 2, 0/2, 2/2, 6/20, 35/50. **<sup>1</sup>H NMR** (400 MHz, CHLOROFORM-*d*)  $\delta$  ppm 8.58 (br. s., 1 H) 7.79 (br. s., 3 H) 7.29 - 7.51 (m, 2 H) 7.04 - 7.27 (m, 3 H) 5.96 (br. s., 3 H) 4.09 (br. s., 1 H) 3.92 (t,  $J=10.94$  Hz, 1 H) 3.49 (d,  $J=12.23$  Hz, 1 H) 3.07 - 3.33 (m, 8 H) 3.00 (d,  $J=12.72$  Hz, 2 H) 2.73 - 2.85 (m, 1 H) 2.48 - 2.67 (m, 2 H) 2.24 (d,  $J=18.95$  Hz, 1 H) 2.16 (br. s., 1 H) 1.90 - 2.08 (m, 4 H) 1.79 (br. s., 1 H) 1.72 (d,  $J=13.08$  Hz, 4 H) 1.60 (br. s., 2 H) 1.51 (br. s., 1 H) 1.38 (br. s., 1 H) 1.10 - 1.35 (m, 4 H) 0.98 (br. s., 4 H) 0.88 (br. s., 4 H) ***m/z*** calcd C<sub>38</sub>H<sub>57</sub>F<sub>6</sub>N<sub>5</sub> [M+H]<sup>+</sup> 697.45, found (MS ESI) 698.20. **Purity** LCMS: 100% (TIC), 100% (214 nm, peak area); **RT** = 3.98 min

**2494-52:** 4-((R)-3-(((R)-1-((R)-2-(((S)-1-amino-3-methylbutan-2-yl)amino)methyl)pyrrolidin-1-yl)-3-phenylpropan-2-yl)amino)-2-((4-ethoxyphenethyl)amino)propyl)phenol. Using General Scheme (scheme 1) for the synthesis of penta-amines compound 2494-52 was synthesized using the following reagents: (R1) Boc-Val-OH, (R2) Boc-D-Phe-OH, (R3) Boc-D-Tyr(2-Br-Z)-OH, (R4) 4-ethoxyphenylacetic acid. The final crude product was purified using HPLC as described above, with a gradient of (B) 2, 0/2, 2/2, 6/10, 35/40. **<sup>1</sup>H NMR** (400 MHz, CHLOROFORM-*d*)  $\delta$  ppm 8.59 (br. s., 1 H) 7.22 (br. s., 2

H) 7.08 - 7.19 (m, 2 H) 6.99 (br. s., 3 H) 6.83 (br. s., 5 H) 6.40 (br. s., 4 H) 3.96 - 4.04 (m, 1 H) 3.94 (br. s., 1 H) 3.64 - 3.88 (m, 1 H) 3.05 - 3.32 (m, 6 H) 2.78 - 3.05 (m, 6 H) 2.68 (d,  $J=11.49$  Hz, 1 H) 2.52 (br. s., 1 H) 2.43 (br. s., 1 H) 2.13 (br. s., 1 H) 1.81 - 2.08 (m, 7 H) 1.40 (br. s., 3 H) 0.98 (br. s., 1 H) 0.92 (br. s., 2 H) 0.83 (br. s., 3 H) **m/z** calcd  $C_{38}H_{57}N_5O_2$   $[M+H]^+$  615.45, found (MS ESI) 616.20. **Purity** LCMS: 100% (TIC), 100% (214 nm, peak area); **RT** = 3.23 min

**2494-53:** **4-((R)-3-(((R)-1-((R)-2-(((S)-1-amino-3-methylbutan-2-yl)amino)methyl)pyrrolidin-1-yl)-3-phenylpropan-2-yl)amino)-2-(((4-(tert-butyl)cyclohexyl)methyl)amino)propyl)phenol.** Using General Scheme (scheme 1) for the synthesis of penta-amines compound 2494-53 was synthesized using the following reagents: (R1) Boc-Val-OH, (R2) Boc-D-Phe-OH, (R3) Boc-D-Tyr(2-Br-Z)-OH, (R4) 4-tert-butyl-cyclohexanecarboxylic acid. The final crude product was purified using HPLC as described above, with a gradient of (B) 2, 0/2, 2/2, 6/15, 35/45. **1H NMR** (400 MHz, CHLOROFORM-*d*)  $\delta$  ppm 8.56 (br. s., 1 H) 7.26 (br. s., 1 H) 7.19 (br. s., 1 H) 6.98 - 7.12 (m, 3 H) 6.93 (br. s., 1 H) 6.86 (br. s., 3 H) 6.37 (br. s., 4 H) 3.96 (br. s., 1 H) 3.66 - 3.83 (m, 1 H) 3.31 (br. s., 1 H) 3.12 - 3.28 (m, 2 H) 3.06 (br. s., 3 H) 2.91 - 3.04 (m, 3 H) 2.88 (br. s., 1 H) 2.63 - 2.84 (m, 2 H) 2.54 (br. s., 1 H) 2.46 (br. s., 1 H) 2.31 (br. s., 1 H) 2.11 (br. s., 1 H) 2.03 (br. s., 4 H) 1.89 (d,  $J=13.08$  Hz, 3 H) 1.81 (br. s., 2 H) 1.57 (br. s., 3 H) 1.00 (br. s., 4 H) 0.93 (br. s., 3 H) 0.85 (br. s., 10 H) **m/z** calcd  $C_{39}H_{65}N_5O$   $[M+H]^+$  619.52, found (MS ESI) 620.25. **Purity** LCMS: 100% (TIC), 100% (214 nm, peak area); **RT** = 3.59 min

**2494-54:** **4-((R)-3-(((R)-1-((R)-2-(((S)-1-amino-3-methylbutan-2-yl)amino)methyl)pyrrolidin-1-yl)-3-phenylpropan-2-yl)amino)-2-((3,5-bis(trifluoromethyl)phenethyl)amino)propyl)phenol.** Using General Scheme (scheme 1) for the synthesis of penta-amines compound 2494-54 was synthesized using the following reagents: (R1) Boc-Val-OH, (R2) Boc-D-Phe-OH, (R3) Boc-D-Tyr(2-Br-Z)-OH, (R4) 3,5-Bis(Trifluoromethyl)-Phenylacetic acid. The final crude product was purified using HPLC as described above, with a gradient of (B) 2, 0/2, 2/2, 6/15, 35/45. **1H NMR** (400 MHz, CHLOROFORM-*d*)  $\delta$  ppm 8.58 (br. s., 2 H) 7.78 (br. s., 2 H) 7.29 (br. s., 1 H) 7.22 (br. s., 2 H) 7.16 (br. s., 1 H) 7.05 (br. s., 2 H) 6.99 (br. s., 2 H) 6.85 (br. s., 3 H) 6.40 (br. s., 3 H) 3.28 - 3.54 (m, 2 H) 3.23 (d,  $J=15.28$  Hz, 2 H) 3.07 - 3.17 (m, 2 H) 3.03 (br. s., 2 H) 2.93 (d,  $J=18.83$  Hz, 3 H) 2.62 - 2.86 (m, 3 H) 2.53 (br. s., 1 H) 2.43 (br. s., 1 H) 2.21 (br. s., 1 H) 2.03 (br. s., 6 H) 1.61 (br. s., 1 H) 0.94 (br. s., 2 H) 0.84 (br. s., 3 H) **m/z** calcd  $C_{38}H_{51}F_6N_5O$   $[M+H]^+$  707.40, found (MS ESI) 708.15. **Purity** LCMS: 100% (TIC), 100% (214 nm, peak area); **RT** = 3.62 min

## HPLC Characterization of Key Compounds

### Compound 1 (TPI 2509-4)

mAU

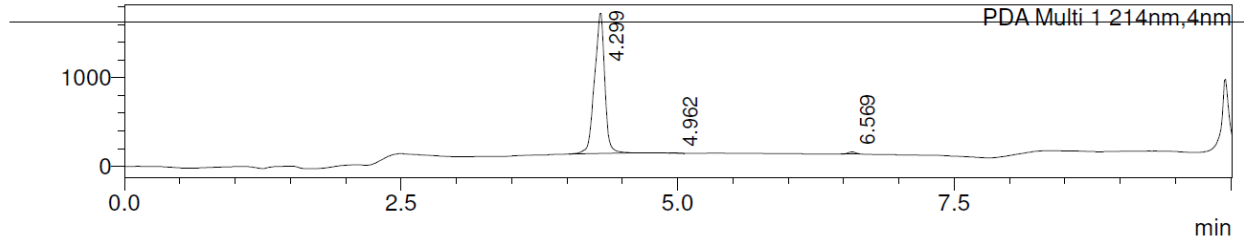

### Compound 2 (TPI 2509-5)

mAU

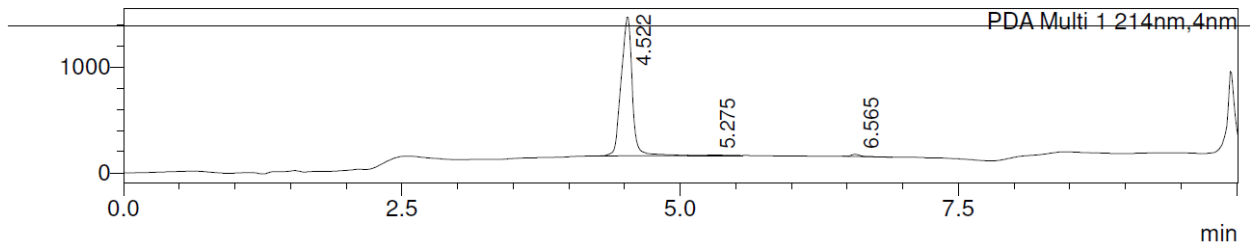

### Compound 10 (TPI 2509-13)

mAU

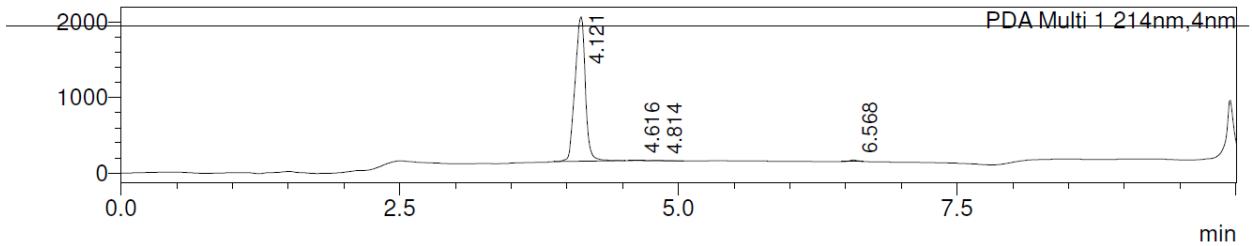

### Compound 11 (TPI 2509-14)

mAU

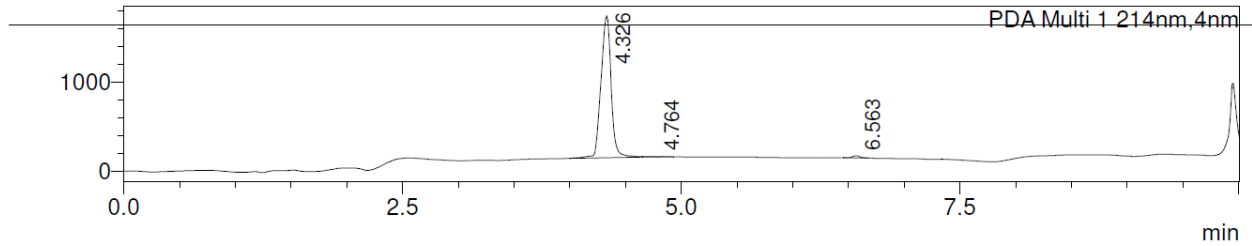

### Compound 19 (TPI 2509-22)

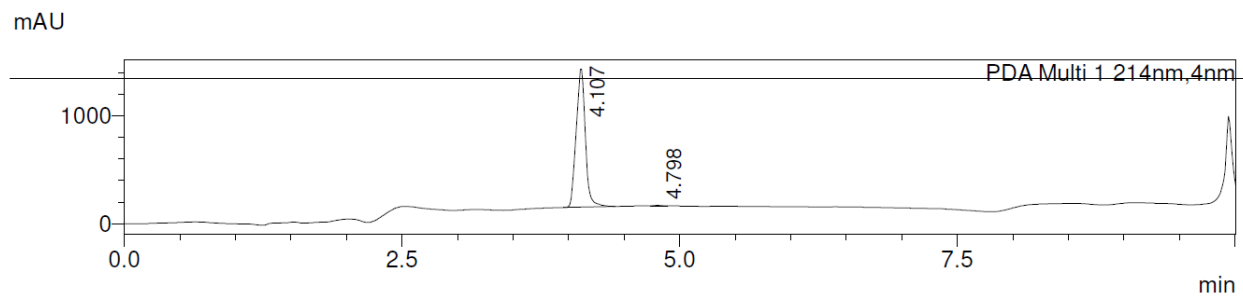

**Compound 20** (TPI 2509-23)

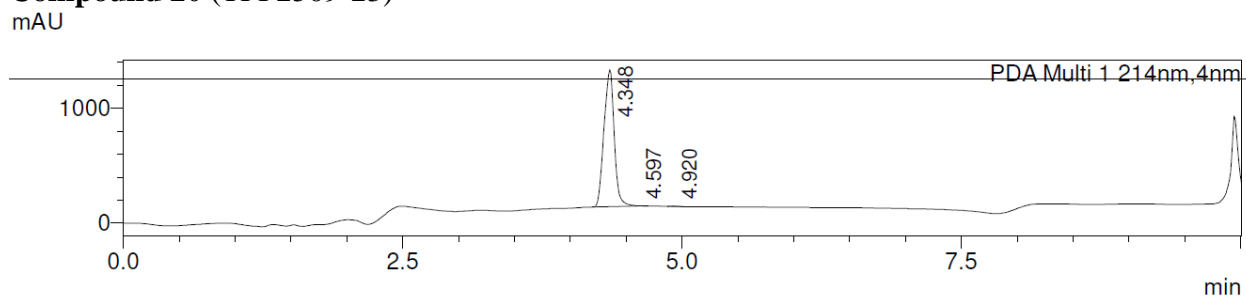

**Compound 23** (TPI 2509-26)

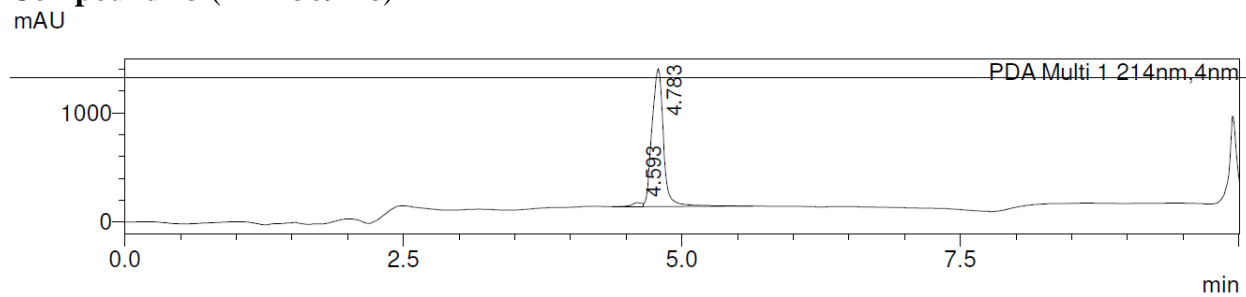

**Compound 28** (TPI 2509-31)

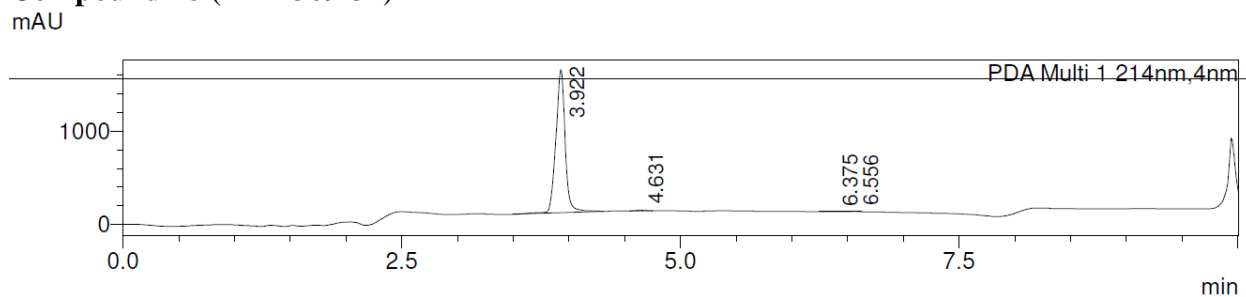

**Compound 29** (TPI 2509-32)

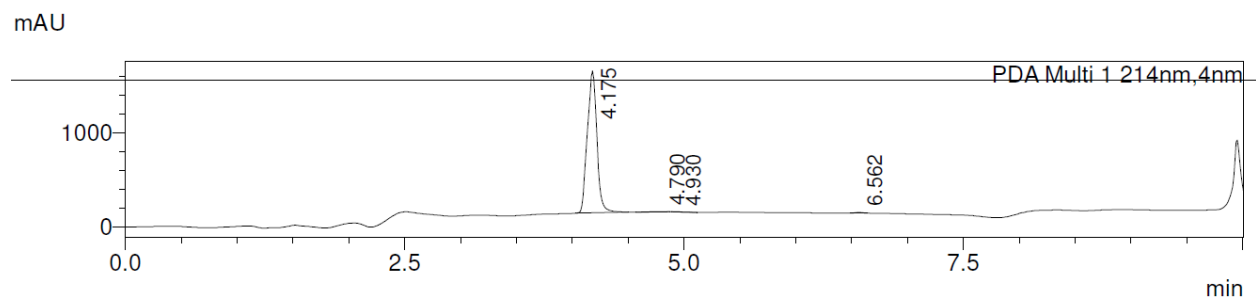



**SI Table 1: Building Block to Functionality Table.** Mixture-based positional scan library, building blocks, and corresponding functionalities for the pyrrolidine bis-cyclic guanidine and penta-amine libraries

| <b>R<sub>1</sub></b> | <b>R<sub>2</sub></b> | <b>R<sub>3</sub></b> | <b>R<sub>4</sub></b> | <b>Building Block</b>                                 | <b>Functionality</b>               |
|----------------------|----------------------|----------------------|----------------------|-------------------------------------------------------|------------------------------------|
| 1                    | 27                   | 53                   |                      | Boc-L-Ala                                             | S-methyl                           |
| 2                    | 28                   | 54                   |                      | Boc-L-Phe                                             | S-benzyl                           |
| 3                    | 29                   | 55                   |                      | Boc-Gly                                               | hydrogen                           |
| 4                    | 30                   | 56                   |                      | Boc-L-Ile                                             | S-2-butyl                          |
| 5                    | 31                   | 57                   |                      | Boc-L-Leu                                             | S-isobutyl                         |
| 6                    | 32                   | 58                   |                      | Boc-L-Ser(Bzl)                                        | R-hydroxymethyl                    |
| 7                    | 33                   | 59                   |                      | Boc-L-Thr(Bzl)                                        | (R,R)-1-hydroxyethyl               |
| 8                    | 34                   | 60                   |                      | Boc-L-Val                                             | S-isopropyl                        |
| 9                    | 35                   | 61                   |                      | Boc-L-Tyr(BrZ)                                        | S-4-hydroxybenzyl                  |
| 10                   | 36                   | 62                   |                      | Boc-D-Ala                                             | R-methyl                           |
| 11                   | 37                   | 63                   |                      | Boc-D-Phe                                             | R-benzyl                           |
| 12                   | 38                   | 64                   |                      | Boc-D-Ile                                             | R-2-butyl                          |
| 13                   | 39                   | 65                   |                      | Boc-D-Leu                                             | R-isobutyl                         |
| 14                   | 40                   | 66                   |                      | Boc-D-Ser(Bzl)                                        | S-hydroxymethyl                    |
| 15                   | 41                   | 67                   |                      | Boc-D-Thr(Bzl)                                        | (S,R)-1-hydroxyethyl               |
| 16                   | 42                   | 68                   |                      | Boc-D-Val                                             | R-isopropyl                        |
| 17                   | 43                   | 69                   |                      | Boc-D-Tyr(BrZ)                                        | R-4-hydroxybenzyl                  |
| 18                   | 44                   | 70                   |                      | Boc-L-Phenylglycine                                   | S-phenyl                           |
| 19                   | 45                   | 71                   |                      | Boc-L-Norvaline                                       | S-propyl                           |
| 20                   | 46                   | 72                   |                      | Boc-D-Norvaline                                       | R-propyl                           |
| 21                   | 47                   | 73                   |                      | Boc-L-Norleucine                                      | S-butyl                            |
| 22                   | 48                   | 74                   |                      | Boc-D-Norleucine                                      | R-butyl                            |
| 23                   | 49                   | 75                   |                      | Boc-L-Naphthylalanine                                 | S-2-naphthylmethyl                 |
| 24                   | 50                   | 76                   |                      | Boc-D-Naphthylalanine                                 | R-2-naphthylmethyl                 |
| 25                   | 51                   | 77                   |                      | Boc-L-Cyclohexylalanine                               | S-cyclohexyl                       |
| 26                   | 52                   | 78                   |                      | Boc-D-Cyclohexylalanine                               | R-cyclohexyl                       |
|                      |                      |                      | 79                   | 1-phenyl-1-cyclopropanecarboxylic acid                | (1-phenyl-cyclopropyl)-methyl      |
|                      |                      |                      | 80                   | 2-phenylbutyric acid                                  | 2-phenylbutyl                      |
|                      |                      |                      | 81                   | 3-phenylbutyric acid                                  | 3-phenylbutyl                      |
|                      |                      |                      | 82                   | m-tolylacetic acid                                    | m-tolyethyl                        |
|                      |                      |                      | 83                   | 3-fluorophenylacetic acid                             | 2-(3-fluoro-phenyl)-ethyl          |
|                      |                      |                      | 84                   | 3-bromophenylacetic acid                              | 2-(3-bromo-phenyl)-ethyl           |
|                      |                      |                      |                      | ( $\alpha$ - $\alpha$ -Trifluoro-m-tolyl) acetic acid | 2-(3-trifluoromethyl-phenyl)-ethyl |
|                      |                      |                      | 85                   | acid                                                  | ethyl                              |
|                      |                      |                      | 86                   | p-tolylacetic acid                                    | p-tolyethyl                        |
|                      |                      |                      | 87                   | 4-fluorophenylacetic acid                             | 2-(4-fluoro-phenyl)-ethyl          |
|                      |                      |                      | 88                   | 3-methoxyphenylacetic acid                            | 2-(3-methoxy-phenyl)-ethyl         |
|                      |                      |                      | 89                   | 4-bromophenylacetic acid                              | 2-(4-bromo-phenyl)-ethyl           |

|     |                                               |                                          |
|-----|-----------------------------------------------|------------------------------------------|
| 90  | 4-methoxyphenylacetic acid                    | 2-(4-methoxy-phenyl)-ethyl               |
| 91  | 4-ethoxyphenylacetic acid                     | 2-(4-ethoxy-phenyl)-ethyl                |
| 92  | 4-isobutyl- $\alpha$ -methylphenylacetic acid | 2-(4-isobutyl-phenyl)-propyl             |
| 93  | 3,4-dichlorophenylacetic acid                 | 3,4-dichlorophenethyl                    |
| 94  | 3,5-bis(trifluoromethyl)-phenylacetic acid    | 2-(3,5-bis-trifluoromethyl-phenyl)-ethyl |
| 95  | 3-(3,4-dimethoxyphenyl)-propionic acid        | 3-(3,4-dimethoxy-phenyl)-propyl          |
| 96  | phenylacetic acid                             | phenyl-ethyl                             |
| 97  | 3,4,5-trimethoxybenzoic acid                  | 3,4,5-trimethoxy-benzyl                  |
| 98  | butyric acid                                  | butyl                                    |
| 99  | heptanoic acid                                | heptyl                                   |
| 100 | isobutyric acid                               | isobutyl                                 |
| 101 | 2-methylbutyric acid                          | 2-methylbutyl                            |
| 102 | isovaleric acid                               | 3-methylbutyl                            |
| 103 | 3-methylvaleric acid                          | 3-methylpentyl                           |
| 104 | 4-methylvaleric acid                          | 4-methylpentyl                           |
| 105 | p-toluic acid                                 | 4-methyl-benzyl                          |
| 106 | cyclopentanecarboxylic acid                   | cyclopentyl-methyl                       |
| 107 | cyclohexanecarboxylic acid                    | cyclohexyl-methyl                        |
| 108 | cyclohexylacetic acid                         | cyclohexyl-ethyl                         |
| 109 | cyclohexanebutyric acid                       | cyclohexyl-butyl                         |
| 110 | cycloheptanecarboxylic acid                   | cycloheptyl-methyl                       |
| 111 | 2-methylcyclopropanecarboxylic acid           | (2-methyl-cyclopropyl)-methyl            |
| 112 | cyclobutanecarboxylic acid                    | cyclobutyl-methyl                        |
| 113 | 3-cyclopentylpropionic acid                   | 3-cyclopentyl-propyl                     |
| 115 | 4-methyl-1-cyclohexanecarboxylic acid         | 4-methyl-1-cyclohexyl-methyl             |
| 116 | 4-tert-butyl-cyclohexanecarboxylic acid       | 4-tert-butyl-cyclohexyl-methyl           |
| 117 | 4-biphenylacetic acid                         | 2-biphenyl-4-yl-ethyl                    |
| 118 | 1-adamantanecarboxylic acid                   | adamantan-1-yl-methyl                    |
| 119 | 1-adamantaneacetic acid                       | 2-adamantan-1-yl-ethyl                   |
| 120 | 2-norbornaneacetic acid                       | 2-bicyclo[2,2,1]hept-2-yl-ethyl          |

The pyrrolidine bis-cyclic guanidine scaffold (TPI1955) was accessed through a tetrapeptide, Xaa<sup>4</sup>-Xaa<sup>3</sup>-Xaa<sup>2</sup>-Pro-Xaa<sup>1</sup>-NH<sub>2</sub>, which was reduced to the corresponding polyamine and subsequently cyclized with cyanogen bromide. The amino acid and carboxylic acid building

blocks maintained their chirality, if there was any, and the side chain functionality after the transformation. Above tabulates the correct nomenclature to describe the substitutions around the template in addition to the building block it was derived from. For example, the amino acid building block Boc-L-Leu was transformed into an *S*-isobutyl sidechain. Also included is the well number for each of the mixtures scanned in the mixture-based positional scan library.

SI Table 2: Pyrrolidine Bis-Cyclic Guanidine Compound SMILES.

| ID | SMILES                                                                                                                    |
|----|---------------------------------------------------------------------------------------------------------------------------|
| 1  | <chem>N=C1N(C[C@@H]([C@](C)([H])O)N1CC23CC4CC(C3)CC(C4)C2)[C@H](CC5CCCCC5)CN6[C@@H](CCC6)CN7[C@H](CC(C)C)CNC7=N</chem>    |
| 2  | <chem>N=C1N(C[C@@H]([C@](C)([H])O)N1CC2CCC(C(C)(C)C)CC2)[C@H](CC3CCCCC3)CN4[C@@H](CCC4)CN5[C@H](CC(C)C)CNC5=N</chem>      |
| 3  | <chem>N=C1N(C[C@@H]([C@](C)([H])O)N1CCCC(C)C)[C@H](CC2CCCCC2)CN3[C@@H](CCC3)CN4[C@H](CC(C)C)CNC4=N</chem>                 |
| 4  | <chem>N=C1N(C[C@@H](CCC)N1CC23CC4CC(C3)CC(C4)C2)[C@H](CC5CCCCC5)CN6[C@@H](CCC6)CN7[C@H](CC(C)C)CNC7=N</chem>              |
| 5  | <chem>N=C1N(C[C@@H](CCC)N1CC2CCC(C(C)(C)C)CC2)[C@H](CC3CCCCC3)CN4[C@@H](CCC4)CN5[C@H](CC(C)C)CNC5=N</chem>                |
| 6  | <chem>N=C1N(C[C@@H](CCC)N1CCCC(C)C)[C@H](CC2CCCCC2)CN3[C@@H](CCC3)CN4[C@H](CC(C)C)CNC4=N</chem>                           |
| 7  | <chem>N=C1N(C[C@@H](C(C)C)N1CC23CC4CC(C3)CC(C4)C2)[C@H](CC5CCCCC5)CN6[C@@H](CCC6)CN7[C@H](CC(C)C)CNC7=N</chem>            |
| 8  | <chem>N=C1N(C[C@@H](C(C)C)N1CC2CCC(C(C)(C)C)CC2)[C@H](CC3CCCCC3)CN4[C@@H](CCC4)CN5[C@H](CC(C)C)CNC5=N</chem>              |
| 9  | <chem>N=C1N(C[C@@H](C(C)C)N1CCCC(C)C)[C@H](CC2CCCCC2)CN3[C@@H](CCC3)CN4[C@H](CC(C)C)CNC4=N</chem>                         |
| 10 | <chem>N=C1N(C[C@@H]([C@](C)([H])O)N1CC23CC4CC(C3)CC(C4)C2)[C@H](CC5=CC=CC=C5)CN6[C@@H](CCC6)CN7[C@H](CC(C)C)CNC7=N</chem> |
| 11 | <chem>N=C1N(C[C@@H]([C@](C)([H])O)N1CC2CCC(C(C)(C)C)CC2)[C@H](CC3=CC=CC=C3)CN4[C@@H](CCC4)CN5[C@H](CC(C)C)CNC5=N</chem>   |
| 12 | <chem>N=C1N(C[C@@H]([C@](C)([H])O)N1CCCC(C)C)[C@H](CC2=CC=CC=C2)CN3[C@@H](CCC3)CN4[C@H](CC(C)C)CNC4=N</chem>              |
| 13 | <chem>N=C1N(C[C@@H](CCC)N1CC23CC4CC(C3)CC(C4)C2)[C@H](CC5=CC=CC=C5)CN6[C@@H](CCC6)CN7[C@H](CC(C)C)CNC7=N</chem>           |
| 14 | <chem>N=C1N(C[C@@H](CCC)N1CC2CCC(C(C)(C)C)CC2)[C@H](CC3=CC=CC=C3)CN4[C@@H](CCC4)CN5[C@H](CC(C)C)CNC5=N</chem>             |
| 15 | <chem>N=C1N(C[C@@H](CCC)N1CCCC(C)C)[C@H](CC2=CC=CC=C2)CN3[C@@H](CCC3)CN4[C@H](CC(C)C)CNC4=N</chem>                        |
| 16 | <chem>N=C1N(C[C@@H](C(C)C)N1CC23CC4CC(C3)CC(C4)C2)[C@H](CC5=CC=CC=C5)CN6[C@@H](CCC6)CN7[C@H](CC(C)C)CNC7=N</chem>         |
| 17 | <chem>N=C1N(C[C@@H](C(C)C)N1CC2CCC(C(C)(C)C)CC2)[C@H](CC3=CC=CC=C3)CN4[C@@H](CCC4)CN5[C@H](CC(C)C)CNC5=N</chem>           |
| 18 | <chem>N=C1N(C[C@@H](C(C)C)N1CCCC(C)C)[C@H](CC2=CC=CC=C2)CN3[C@@H](CCC3)CN4[C@H](CC(C)C)CNC4=N</chem>                      |
| 19 | <chem>N=C1N(C[C@@H]([C@](C)([H])O)N1CC23CC4CC(C3)CC(C4)C2)[C@H](CC5CCCCC5)CN6[C@@H](CCC6)CN7[C@H](C(C)C)CNC7=N</chem>     |
| 20 | <chem>N=C1N(C[C@@H]([C@](C)([H])O)N1CC2CCC(C(C)(C)C)CC2)[C@H](CC3CCCCC3)CN4[C@@H](CCC4)CN5[C@H](C(C)C)CNC5=N</chem>       |
| 21 | <chem>N=C1N(C[C@@H]([C@](C)([H])O)N1CCCC(C)C)[C@H](CC2CCCCC2)CN3[C@@H](CCC3)CN4[C@H](C(C)C)CNC4=N</chem>                  |
| 22 | <chem>N=C1N(C[C@@H](CCC)N1CC23CC4CC(C3)CC(C4)C2)[C@H](CC5CCCCC5)CN6[C@@H](CCC6)CN7[C@H](C(C)C)CNC7=N</chem>               |
| 23 | <chem>N=C1N(C[C@@H](CCC)N1CC2CCC(C(C)(C)C)CC2)[C@H](CC3CCCCC3)CN4[C@@H](CCC4)CN5[C@H](C(C)C)CNC5=N</chem>                 |
| 24 | <chem>N=C1N(C[C@@H](CCC)N1CCCC(C)C)[C@H](CC2CCCCC2)CN3[C@@H](CCC3)CN4[C@H](C(C)C)CNC4=N</chem>                            |
| 25 | <chem>N=C1N(C[C@@H](C(C)C)N1CC23CC4CC(C3)CC(C4)C2)[C@H](CC5CCCCC5)CN6[C@@H](CCC6)CN7[C@H](C(C)C)CNC7=N</chem>             |
| 26 | <chem>N=C1N(C[C@@H](C(C)C)N1CC2CCC(C(C)(C)C)CC2)[C@H](CC3CCCCC3)CN4[C@@H](CCC4)CN5[C@H](C(C)C)CNC5=N</chem>               |
| 27 | <chem>N=C1N(C[C@@H](C(C)C)N1CCCC(C)C)[C@H](CC2CCCCC2)CN3[C@@H](CCC3)CN4[C@H](C(C)C)CNC4=N</chem>                          |
| 28 | <chem>N=C1N(C[C@@H]([C@](C)([H])O)N1CC23CC4CC(C3)CC(C4)C2)[C@H](CC5=CC=CC=C5)CN6[C@@H](CCC6)CN7[C@H](C(C)C)CNC7=N</chem>  |
| 29 | <chem>N=C1N(C[C@@H]([C@](C)([H])O)N1CC2CCC(C(C)(C)C)CC2)[C@H](CC3=CC=CC=C3)CN4[C@@H](CCC4)CN5[C@H](C(C)C)CNC5=N</chem>    |
| 30 | <chem>N=C1N(C[C@@H]([C@](C)([H])O)N1CCCC(C)C)[C@H](CC2=CC=CC=C2)CN3[C@@H](CCC3)CN4[C@H](C(C)C)CNC4=N</chem>               |

|    |                                                                                                     |
|----|-----------------------------------------------------------------------------------------------------|
| 31 | N=C1N(C[C@@H](CCC)N1CC23CC4CC(C3)CC(C4)C2)[C@H](CC5=CC=CC=C5)CN6[C@@H](CCC6)CN7[C@H](C(C)C)CNC7=N   |
| 32 | N=C1N(C[C@@H](CCC)N1CC2CCC(C(C)(C)C)CC2)[C@H](CC3=CC=CC=C3)CN4[C@@H](CCC4)CN5[C@H](C(C)C)CNC5=N     |
| 33 | N=C1N(C[C@@H](CCC)N1CCCC(C)C)[C@H](CC2=CC=CC=C2)CN3[C@@H](CCC3)CN4[C@H](C(C)C)CNC4=N                |
| 34 | N=C1N(C[C@@H](C(C)C)N1CC23CC4CC(C3)CC(C4)C2)[C@H](CC5=CC=CC=C5)CN6[C@@H](CCC6)CN7[C@H](C(C)C)CNC7=N |
| 35 | N=C1N(C[C@@H](C(C)C)N1CC2CCC(C(C)(C)C)CC2)[C@H](CC3=CC=CC=C3)CN4[C@@H](CCC4)CN5[C@H](C(C)C)CNC5=N   |
| 36 | N=C1N(C[C@@H](C(C)C)N1CCCC(C)C)[C@H](CC2=CC=CC=C2)CN3[C@@H](CCC3)CN4[C@H](C(C)C)CNC4=N              |
| 37 | N=C1N(CCN1CC2CCC(C(C)(C)C)CC2)[C@H](CC3=CC=CC=C3)CN4[C@@H](CCC4)CN5[C@H]([C@@H](C)CC)CNC5=N         |

**SI Table 3: Penta-amine Compound SMILES.**

| ID      | SMILES                                                                                                                               |
|---------|--------------------------------------------------------------------------------------------------------------------------------------|
| 2494-1  | <chem>NC[C@@H]([C@@](CC)(H)C)NC[C@@H](CCC1)N1C[C@@H](C(C)([H])O)NC[C@@H](CC2=CC=CC=C2)NCCC3=CC=C(OCC)C=C3</chem>                     |
| 2494-2  | <chem>NC[C@@H]([C@@](CC)(H)C)NC[C@@H](CCC1)N1C[C@@H]([C@](C)([H])O)NC[C@@H](CC2=CC=CC=C2)NCC3CCC(C(C)(C)C)CC3</chem>                 |
| 2494-3  | <chem>NC[C@@H]([C@@](CC)(H)C)NC[C@@H](CCC1)N1C[C@@H](C(C)([H])O)NC[C@@H](CC2=CC=CC=C2)NCCC3=CC(C(F)(F)F)=CC(C(F)(F)F)=C3</chem>      |
| 2494-4  | <chem>NC[C@@H]([C@@](CC)(H)C)NC[C@@H](CCC1)N1C[C@@H](C(C)([H])O)NC[C@@H](CC2CCCCC2)NCCC3=CC=C(OCC)C=C3</chem>                        |
| 2494-5  | <chem>NC[C@@H]([C@@](CC)(H)C)NC[C@@H](CCC1)N1C[C@@H](C(C)([H])O)NC[C@@H](CC2CCCCC2)NCC3CCC(C(C)(C)C)CC3</chem>                       |
| 2494-6  | <chem>NC[C@@H]([C@@](CC)(H)C)NC[C@@H](CCC1)N1C[C@@H](C(C)([H])O)NC[C@@H](CC2CCCCC2)NCCC3=CC(C(F)(F)F)=CC(C(F)(F)F)=C3</chem>         |
| 2494-7  | <chem>NC[C@@H]([C@@](CC)(H)C)NC[C@@H](CCC1)N1C[C@@H](C(C)([H])O)NC[C@@H](CC2=CC=C(O)C=C2)NCCC3=CC=C(OCC)C=C3</chem>                  |
| 2494-8  | <chem>NC[C@@H]([C@@](CC)(H)C)NC[C@@H](CCC1)N1C[C@@H](C(C)([H])O)NC[C@@H](CC2=CC=C(O)C=C2)NCC3CCC(C(C)(C)C)CC3</chem>                 |
| 2494-9  | <chem>NC[C@@H]([C@@](CC)(H)C)NC[C@@H](CCC1)N1C[C@@H](C(C)([H])O)NC[C@@H](CC2=CC=C(O)C=C2)NCCC3=CC(C(F)(F)F)=CC(C(F)(F)F)=C3</chem>   |
| 2494-10 | <chem>NC[C@@H]([C@@](CC)(H)C)NC[C@@H](CCC1)N1C[C@@H](CC2CCCCC2)NC[C@@H](CC3=CC=CC=C3)NCCC4=CC=C(OCC)C=C4</chem>                      |
| 2494-11 | <chem>NC[C@@H]([C@@](CC)(H)C)NC[C@@H](CCC1)N1C[C@@H](CC2CCCCC2)NC[C@@H](CC3=CC=CC=C3)NCC4CCC(C(C)(C)C)CC4</chem>                     |
| 2494-12 | <chem>NC[C@@H]([C@@](CC)(H)C)NC[C@@H](CCC1)N1C[C@@H](CC2CCCCC2)NC[C@@H](CC3=CC=CC=C3)NCCC4=CC(C(F)(F)F)=CC(C(F)(F)F)=C4</chem>       |
| 2494-13 | <chem>NC[C@@H]([C@@](CC)(H)C)NC[C@@H](CCC1)N1C[C@@H](CC2CCCCC2)NC[C@@H](CC3CCCCC3)NCCC4=CC=C(OCC)C=C4</chem>                         |
| 2494-14 | <chem>NC[C@@H]([C@@](CC)(H)C)NC[C@@H](CCC1)N1C[C@@H](CC2CCCCC2)NC[C@@H](CC3CCCCC3)NCC4CCC(C(C)(C)C)CC4</chem>                        |
| 2494-15 | <chem>NC[C@@H]([C@@](CC)(H)C)NC[C@@H](CCC1)N1C[C@@H](CC2CCCCC2)NC[C@@H](CC3CCCCC3)NCCC4=CC(C(F)(F)F)=CC(C(F)(F)F)=C4</chem>          |
| 2494-16 | <chem>NC[C@@H]([C@@](CC)(H)C)NC[C@@H](CCC1)N1C[C@@H](CC2CCCCC2)NC[C@@H](CC3=CC=C(O)C=C3)NCCC4=CC=C(OCC)C=C4</chem>                   |
| 2494-17 | <chem>NC[C@@H]([C@@](CC)(H)C)NC[C@@H](CCC1)N1C[C@@H](CC2CCCCC2)NC[C@@H](CC3=CC=C(O)C=C3)NCC4CCC(C(C)(C)C)CC4</chem>                  |
| 2494-18 | <chem>NC[C@@H]([C@@](CC)(H)C)NC[C@@H](CCC1)N1C[C@@H](CC2CCCCC2)NC[C@@H](CC3=CC=C(O)C=C3)NCCC4=CC(C(F)(F)F)=CC(C(F)(F)F)=C4</chem>    |
| 2494-19 | <chem>NC[C@@H]([C@@](CC)(H)C)NC[C@@H](CCC1)N1C[C@@H](CC2=CC=CC=C2)NC[C@@H](CC3=CC=CC=C3)NCCC4=CC=C(OCC)C=C4</chem>                   |
| 2494-20 | <chem>NC[C@@H]([C@@](CC)(H)C)NC[C@@H](CCC1)N1C[C@@H](CC2=CC=CC=C2)NC[C@@H](CC3=CC=CC=C3)NCC4CCC(C(C)(C)C)CC4</chem>                  |
| 2494-21 | <chem>NC[C@@H]([C@@](CC)(H)C)NC[C@@H](CCC1)N1C[C@@H](CC2=CC=CC=C2)NC[C@@H](CC3=CC=CC=C3)NCCC4=CC(C(F)(F)F)=CC(C(F)(F)F)=C4</chem>    |
| 2494-22 | <chem>NC[C@@H]([C@@](CC)(H)C)NC[C@@H](CCC1)N1C[C@@H](CC2=CC=CC=C2)NC[C@@H](CC3CCCCC3)NCCC4=CC=C(OCC)C=C4</chem>                      |
| 2494-23 | <chem>NC[C@@H]([C@@](CC)(H)C)NC[C@@H](CCC1)N1C[C@@H](CC2=CC=CC=C2)NC[C@@H](CC3CCCCC3)NCC4CCC(C(C)(C)C)CC4</chem>                     |
| 2494-24 | <chem>NC[C@@H]([C@@](CC)(H)C)NC[C@@H](CCC1)N1C[C@@H](CC2=CC=CC=C2)NC[C@@H](CC3CCCCC3)NCCC4=CC(C(F)(F)F)=CC(C(F)(F)F)=C4</chem>       |
| 2494-25 | <chem>NC[C@@H]([C@@](CC)(H)C)NC[C@@H](CCC1)N1C[C@@H](CC2=CC=CC=C2)NC[C@@H](CC3=CC=C(O)C=C3)NCCC4=CC=C(OCC)C=C4</chem>                |
| 2494-26 | <chem>NC[C@@H]([C@@](CC)(H)C)NC[C@@H](CCC1)N1C[C@@H](CC2=CC=CC=C2)NC[C@@H](CC3=CC=C(O)C=C3)NCC4CCC(C(C)(C)C)CC4</chem>               |
| 2494-27 | <chem>NC[C@@H]([C@@](CC)(H)C)NC[C@@H](CCC1)N1C[C@@H](CC2=CC=CC=C2)NC[C@@H](CC3=CC=C(O)C=C3)NCCC4=CC(C(F)(F)F)=CC(C(F)(F)F)=C4</chem> |
| 2494-28 | <chem>NC[C@H](C(C)([H])C)NC[C@@H](CCC1)N1C[C@@H](C(C)([H])O)NC[C@@H](CC2=CC=CC=C2)NCCC3=CC=C(OCC)C=C3</chem>                         |
| 2494-29 | <chem>NC[C@H](C(C)([H])C)NC[C@@H](CCC1)N1C[C@@H]([C@](C)([H])O)NC[C@@H](CC2=CC=CC=C2)NCC3CCC(C(C)(C)C)CC3</chem>                     |
| 2494-30 | <chem>NC[C@H](C(C)([H])C)NC[C@@H](CCC1)N1C[C@@H](C(C)([H])O)NC[C@@H](CC2=CC=CC=C2)NCCC3=CC(C(F)(F)F)=CC(C(F)(F)F)=C3</chem>          |
| 2494-31 | <chem>NC[C@H](C(C)([H])C)NC[C@@H](CCC1)N1C[C@@H](C(C)([H])O)NC[C@@H](CC2CCCCC2)NCCC3=CC=C(OCC)C=C3</chem>                            |
| 2494-32 | <chem>NC[C@H](C(C)([H])C)NC[C@@H](CCC1)N1C[C@@H](C(C)([H])O)NC[C@@H](CC2CCCCC2)NCC3CCC(C(C)(C)C)CC3</chem>                           |

|                |                                                                                                                     |
|----------------|---------------------------------------------------------------------------------------------------------------------|
| <b>2494-33</b> | NC[C@H](C(C)([H])C)NC[C@@H](CCC1)N1C[C@@H](C(C)([H])O)NC[C@@H](CC2CCCC2)NCCC3=CC(C(F)(F)F)=CC(C(F)(F)F)=C3          |
| <b>2494-34</b> | NC[C@H](C(C)([H])C)NC[C@@H](CCC1)N1C[C@@H](C(C)([H])O)NC[C@@H](CC2=CC=C(O)C=C2)NCCC3=CC=C(OCC)C=C3                  |
| <b>2494-35</b> | NC[C@H](C(C)([H])C)NC[C@@H](CCC1)N1C[C@@H](C(C)([H])O)NC[C@@H](CC2=CC=C(O)C=C2)NCC3CCC(C(C)(C)C)CC3                 |
| <b>2494-36</b> | NC[C@H](C(C)([H])C)NC[C@@H](CCC1)N1C[C@@H](C(C)([H])O)NC[C@@H](CC2=CC=C(O)C=C2)NCCC3=CC(C(F)(F)F)=CC(C(F)(F)F)=C3   |
| <b>2494-37</b> | NC[C@H](C(C)([H])C)NC[C@@H](CCC1)N1C[C@@H](CC2CCCC2)NC[C@@H](CC3=CC=CC=C3)NCCC4=CC=C(OCC)C=C4                       |
| <b>2494-38</b> | NC[C@H](C(C)([H])C)NC[C@@H](CCC1)N1C[C@@H](CC2CCCC2)NC[C@@H](CC3=CC=CC=C3)NCC4CCC(C(C)(C)C)CC4                      |
| <b>2494-39</b> | NC[C@H](C(C)([H])C)NC[C@@H](CCC1)N1C[C@@H](CC2CCCC2)NC[C@@H](CC3=CC=CC=C3)NCCC4=CC(C(F)(F)F)=CC(C(F)(F)F)=C4        |
| <b>2494-40</b> | NC[C@H](C(C)([H])C)NC[C@@H](CCC1)N1C[C@@H](CC2CCCC2)NC[C@@H](CC3CCCC3)NCCC4=CC=C(OCC)C=C4                           |
| <b>2494-41</b> | NC[C@H](C(C)([H])C)NC[C@@H](CCC1)N1C[C@@H](CC2CCCC2)NC[C@@H](CC3CCCC3)NCC4CCC(C(C)(C)C)CC4                          |
| <b>2494-42</b> | NC[C@H](C(C)([H])C)NC[C@@H](CCC1)N1C[C@@H](CC2CCCC2)NC[C@@H](CC3CCCC3)NCCC4=CC(C(F)(F)F)=CC(C(F)(F)F)=C4            |
| <b>2494-43</b> | NC[C@H](C(C)([H])C)NC[C@@H](CCC1)N1C[C@@H](CC2CCCC2)NC[C@@H](CC3=CC=C(O)C=C3)NCCC4=CC=C(OCC)C=C4                    |
| <b>2494-44</b> | NC[C@H](C(C)([H])C)NC[C@@H](CCC1)N1C[C@@H](CC2CCCC2)NC[C@@H](CC3=CC=C(O)C=C3)NCC4CCC(C(C)(C)C)CC4                   |
| <b>2494-45</b> | NC[C@H](C(C)([H])C)NC[C@@H](CCC1)N1C[C@@H](CC2CCCC2)NC[C@@H](CC3=CC=C(O)C=C3)NCCC4=CC(C(F)(F)F)=CC(C(F)(F)F)=C4     |
| <b>2494-46</b> | NC[C@H](C(C)([H])C)NC[C@@H](CCC1)N1C[C@@H](CC2=CC=CC=C2)NC[C@@H](CC3=CC=CC=C3)NCCC4=CC=C(OCC)C=C4                   |
| <b>2494-47</b> | NC[C@H](C(C)([H])C)NC[C@@H](CCC1)N1C[C@@H](CC2=CC=CC=C2)NC[C@@H](CC3=CC=CC=C3)NCC4CCC(C(C)(C)C)CC4                  |
| <b>2494-48</b> | NC[C@H](C(C)([H])C)NC[C@@H](CCC1)N1C[C@@H](CC2=CC=CC=C2)NC[C@@H](CC3=CC=CC=C3)NCCC4=CC(C(F)(F)F)=CC(C(F)(F)F)=C4    |
| <b>2494-49</b> | NC[C@H](C(C)([H])C)NC[C@@H](CCC1)N1C[C@@H](CC2=CC=CC=C2)NC[C@@H](CC3CCCC3)NCCC4=CC=C(OCC)C=C4                       |
| <b>2494-50</b> | NC[C@H](C(C)([H])C)NC[C@@H](CCC1)N1C[C@@H](CC2=CC=CC=C2)NC[C@@H](CC3CCCC3)NCC4CCC(C(C)(C)C)CC4                      |
| <b>2494-51</b> | NC[C@H](C(C)([H])C)NC[C@@H](CCC1)N1C[C@@H](CC2=CC=CC=C2)NC[C@@H](CC3CCCC3)NCCC4=CC(C(F)(F)F)=CC(C(F)(F)F)=C4        |
| <b>2494-52</b> | NC[C@H](C(C)([H])C)NC[C@@H](CCC1)N1C[C@@H](CC2=CC=CC=C2)NC[C@@H](CC3=CC=C(O)C=C3)NCCC4=CC=C(OCC)C=C4                |
| <b>2494-53</b> | NC[C@H](C(C)([H])C)NC[C@@H](CCC1)N1C[C@@H](CC2=CC=CC=C2)NC[C@@H](CC3=CC=C(O)C=C3)NCC4CCC(C(C)(C)C)CC4               |
| <b>2494-54</b> | NC[C@H](C(C)([H])C)NC[C@@H](CCC1)N1C[C@@H](CC2=CC=CC=C2)NC[C@@H](CC3=CC=C(O)C=C3)NCCC4=CC(C(F)(F)F)=CC(C(F)(F)F)=C4 |
